# Supplementary material
Source: PubMed Central journal article supplement (PMC153613)
Supplement: pnas_0330960100_1.pdf [file pnas_0330960100_1.pdf]

**Table 1. Clinical and histopathological information. The percentage of fast, slow, developmental, and neonatal myosin-positive fibers was estimated using immunohistochemistry (see Methods)**

| Diagnosis (severity) | Tissue no.             | Age/gender | Autopsy/surgical | % Fast fibers    | % Slow fibers    | % Dev fibers     | % Neo fibers     | Muscle type       |
|----------------------|------------------------|------------|------------------|------------------|------------------|------------------|------------------|-------------------|
| NM (severe)          | <b>T15</b>             | 3wk/M      | A                | 65               | 35               | 38               | 49               | diaphragm         |
| NM (severe)          | <b>T24</b>             | 3wk/M      | A                | 62               | 38               | 0                | 33               | psoas             |
| NM (typical)         | <b>T26<sup>1</sup></b> | 17yr/F     | S                | 0                | 100              | 0                | 0                | limb              |
| NM (typical)         | <b>T33</b>             | 1yr/F      | S                | 10               | 90               | 0                | 10               | quadriceps        |
| NM (severe)          | <b>T39<sup>2</sup></b> | 1wk/M      | A                | 85               | 15               | 80               | 65               | diaphragm         |
| NM (severe)          | <b>T41<sup>2</sup></b> | 1wk/M      | A                | 86               | 14               | 74               | 10               | abdominal wall    |
| NM (typical)         | <b>T43<sup>1</sup></b> | 19yr/M     | A                | 0                | 100              | 0                | 0                | skeletal          |
| NM (typical)         | <b>T47<sup>1</sup></b> | 28yr/F     | S                | 0.2              | 99.8             | 0                | 0.2              | quadriceps        |
| NM (severe)          | <b>T68</b>             | 1m/F       | A                | 89               | 11               | 8                | 0                | quadriceps        |
| NM (typical)         | <b>T80</b>             | 2m/M       | S                | 62               | 38               | 0                | 61               | quadriceps        |
| NM (typical)         | <b>T95</b>             | 15 yr/M    | S                | 10               | 90               | 0                | 0                | deltoid           |
| NM (typical)         | <b>T99</b>             | 42yr/F     | S                | 20               | 80               | 0                | 0                | tibialis anterior |
| NM (typical)         | <b>T133</b>            | 35yr/M     | A                | 70               | 30               | 0                | 0                | quadriceps        |
| normal               | <b>T130</b>            | 17yr/F     | S                | 55               | 45               | 0                | 0                | distal limb       |
| normal               | <b>T136</b>            | 15yr/F     | S                | 60               | 40               | 0                | 0                | distal limb       |
| normal               | <b>T137</b>            | 14yr/M     | S                | 50               | 50               | 0                | 0                | quadriceps        |
| normal               | <b>T140</b>            | 13yr/M     | S                | 70               | 30               | 0                | 0                | limb              |
| normal               | <b>T141</b>            | 2yr/M      | S                | 55               | 45               | 0                | 0                | skeletal          |
| normal               | <b>T142</b>            | 2yr/F      | S                | 55               | 45               | 0                | 0                | quadriceps        |
| normal               | <b>T144</b>            | 6yr/M      | S                | 50               | 50               | 0                | 0                | quadriceps        |
| normal               | <b>T145</b>            | 10yr/M     | S                | 65               | 35               | 0                | 0                | quadriceps        |
| normal               | <b>T146</b>            | 1yr/M      | S                | 55               | 45               | 0                | 0                | quadriceps        |
| normal               | <b>T147</b>            | 4yr/F      | S                | 40               | 60               | 0                | 0                | quadriceps        |
| normal               | <b>T148</b>            | 5yr/F      | S                | 55               | 45               | 0                | 0                | quadriceps        |
| normal               | <b>T149</b>            | 4wk/M      | A                | 60               | 40               | 0                | 0                | quadriceps        |
| normal               | <b>T160</b>            | 2yr/M      | A                | 40               | 60               | 0                | 0                | quadriceps        |
| normal               | <b>T169</b>            | 30yr/M     | S                | n/a <sup>3</sup> | n/a <sup>3</sup> | n/a <sup>3</sup> | n/a <sup>3</sup> | intercostal       |
| normal               | <b>T170</b>            | 65yr/M     | A                | n/a <sup>3</sup> | n/a <sup>3</sup> | n/a <sup>3</sup> | n/a <sup>3</sup> | quadriceps        |
| normal               | <b>T172</b>            | 60yr/M     | S                | n/a <sup>3</sup> | n/a <sup>3</sup> | n/a <sup>3</sup> | n/a <sup>3</sup> | quadriceps        |
| normal               | <b>T177</b>            | 67yr/M     | A                | 35               | 65               | 0                | 0                | pectoral          |
| normal               | <b>T178</b>            | 55yr/F     | A                | 40               | 60               | 0                | 0                | limb              |
| normal               | <b>T179</b>            | 72yr/M     | A                | 65               | 35               | 0                | 0                | limb              |
| normal               | <b>T180</b>            | 58yr/M     | S                | 60               | 40               | 0                | 0                | biceps            |
| normal               | <b>T181</b>            | 37yr/F     | S                | n/a <sup>3</sup> | n/a <sup>3</sup> | n/a <sup>3</sup> | n/a <sup>3</sup> | quadriceps        |

<sup>1</sup>These biopsies met criteria for "non typing" cases with large rods in all fibers as described by Ryan *et al.* [(2003), *Neurology* **60**:665-673].

<sup>2</sup>T39 and T41 are two independent biopsies from the same patient.

<sup>3</sup>No tissue was available for immunohistochemistry.
