# Supplementary material
Source: PubMed Central journal article supplement (PMC153613)
Supplement: pnas_0330960100_3.pdf [file pnas_0330960100_3.pdf]

**Table 2. All probe sets with fold changes higher than set thresholds but  $P > 0.001$** 

| Affy no.                         | Gene name                                                                                                                       | Symbol          | Location      | Fold  |
|----------------------------------|---------------------------------------------------------------------------------------------------------------------------------|-----------------|---------------|-------|
| <b>Down-regulated probe sets</b> |                                                                                                                                 |                 |               |       |
| 47879_at                         | N46863                                                                                                                          |                 |               | -16.9 |
| 59447_at                         | N52773                                                                                                                          |                 |               | -9.6  |
| 55503_at                         | AI085361                                                                                                                        |                 |               | -9.1  |
| 47087_at                         | AI310524                                                                                                                        |                 |               | -9.0  |
| 37209_g_at                       | phosphoserine phosphatase-like                                                                                                  | <i>PSPHL</i>    | 7q11.2        | -8.4  |
| 47137_at                         | AI479899                                                                                                                        |                 | 19p13.3       | -8.1  |
| 45876_at                         | AA536137                                                                                                                        |                 |               | -6.9  |
| 45260_at                         | TU3A protein                                                                                                                    | <i>TU3A</i>     | 3p21.1        | -6.7  |
| 56246_at                         | 6-phosphofructo-2-kinase/fructose-2,6-bisphosphatase 3                                                                          | <i>PFKFB3</i>   | 10p14-p15     | -6.7  |
| 50230_at                         | hexokinase 2                                                                                                                    | <i>HK2</i>      | 2p13          | -6.6  |
| 38248_at                         | AB011124                                                                                                                        |                 | 20p13         | -6.5  |
| 44426_at                         | R93141                                                                                                                          |                 |               | -6.4  |
| 48542_at                         | W27559                                                                                                                          |                 |               | -6.3  |
| 53813_at                         | AW051518                                                                                                                        |                 | 13q13.3       | -6.1  |
| 59577_at                         | AA243670                                                                                                                        |                 |               | -6.0  |
| 46907_at                         | W37075                                                                                                                          |                 |               | -5.8  |
| 49078_at                         | AA424983                                                                                                                        |                 |               | -5.7  |
| 49026_at                         | AI357153                                                                                                                        |                 | 20p12.3       | -5.4  |
| 53487_at                         | AI670947                                                                                                                        |                 |               | -5.4  |
| 50161_at                         | N39328                                                                                                                          |                 |               | -5.1  |
| 35994_at                         | AC002398                                                                                                                        | <i>F25965</i>   | 19q13.1       | -4.9  |
| 52285_f_at                       | AW002970                                                                                                                        |                 | 18p11.1       | -4.8  |
| 40964_at                         | hexokinase 2                                                                                                                    | <i>HK2</i>      | 2p13          | -4.6  |
| 49806_at                         | AI932283                                                                                                                        |                 |               | -4.5  |
| 58918_at                         | molecule possessing ankyrin repeats induced by lipopolysaccharide (MAIL), homolog of mouse heat shock 27 kDa associated protein | <i>MAIL</i>     | 3p12-q12      | -4.3  |
| 44633_at                         |                                                                                                                                 |                 | 3q21.1        | -4.3  |
| 46858_at                         | AI796221                                                                                                                        |                 |               | -4.2  |
| 36711_at                         | v-maf musculoaponeurotic fibrosarcoma oncogene homolog F (avian)                                                                | <i>MAFF</i>     | 22q13.1       | -4.1  |
| 54683_at                         | N49844                                                                                                                          |                 |               | -4.1  |
| 46621_at                         | N32595                                                                                                                          |                 |               | -4.1  |
| 49629_at                         | N47713                                                                                                                          |                 |               | -3.9  |
| 47703_at                         | W89189                                                                                                                          |                 |               | -3.9  |
| 59313_at                         | AI598222                                                                                                                        |                 |               | -3.8  |
| 34721_at                         | FK506 binding protein 5                                                                                                         | <i>FKBP5</i>    | 6p21.3-21.2   | -3.8  |
| 46843_at                         | AI632621                                                                                                                        |                 |               | -3.7  |
| 59611_at                         | R53069                                                                                                                          |                 | 16p11.2       | -3.7  |
| 58315_at                         | AA778171                                                                                                                        |                 | 3p25.1        | -3.6  |
| 46607_f_at                       | AI885018                                                                                                                        |                 | 17q25.3       | -3.6  |
| 33143_s_at                       | solute carrier family 16 (monocarboxylic acid transporters), member 3                                                           | <i>SLC16A3</i>  | 22q12.3-q13.2 | -3.5  |
| 54152_at                         | eukaryotic translation initiation factor 4E binding protein 1                                                                   | <i>EIF4EBP1</i> | 8p12          | -3.4  |
| 43935_at                         | ARF-GAP, RHO-GAP, ankyrin repeat and plekstrin homology domains-containing protein 3                                            | <i>ARAP3</i>    | 5q31.3        | -3.2  |
| 33849_at                         | pre-B-cell colony-enhancing factor                                                                                              | <i>PBEF</i>     | 7q11.23       | -3.2  |
| 46902_at                         | N92294                                                                                                                          |                 |               | -3.2  |
| 47023_at                         | N25555                                                                                                                          |                 |               | -3.1  |

|            |                                                                                              |                |                 |      |
|------------|----------------------------------------------------------------------------------------------|----------------|-----------------|------|
| 49459_at   | apolipoprotein L, 1                                                                          | <i>APOL1</i>   | 22q13.1         | -3.0 |
| 38271_at   | histone deacetylase 4                                                                        | <i>HDAC4</i>   | 2q37.2          | -3.0 |
| 39114_at   | decidual protein induced by progesterone                                                     | <i>DEPP</i>    | 10q11.23        | -3.0 |
| 33562_g_at | collagen, type IV, alpha 3 (Goodpasture antigen)                                             | <i>COL4A3</i>  | 2q36-q37        | -2.9 |
| 45113_r_at | AI028617                                                                                     |                | 1pter-q31.3     | -2.9 |
| 46205_at   | AA044205                                                                                     |                |                 | -2.9 |
| 52558_s_at | DAZ associated protein 1                                                                     | <i>DAZAP1</i>  | 19p13.3         | -2.8 |
| 46811_at   | AI765552                                                                                     |                |                 | -2.8 |
| 36309_at   | growth differentiation factor 8                                                              | <i>GDF8</i>    | 2q32.2          | -2.8 |
| 43449_at   | AI185063                                                                                     |                |                 | -2.8 |
| 34311_at   | glutaredoxin (thioltransferase)                                                              | <i>GLRX</i>    | 5q14            | -2.8 |
| 56568_at   | AA203241                                                                                     |                | 20p11           | -2.7 |
| 58305_at   | AI003520                                                                                     |                | 1q32.3          | -2.7 |
| 45126_at   | ectonucleotide pyrophosphatase/phosphodiesterase 5 (putative function)                       | <i>ENPP5</i>   | 6p21.1-p11.2    | -2.7 |
| 49039_at   | AI677839                                                                                     |                |                 | -2.7 |
| 32084_at   | solute carrier family 22 (organic cation transporter), member 5                              | <i>SLC22A5</i> | 5q31            | -2.7 |
| 37560_at   | AL050143                                                                                     |                | 2q37.3          | -2.7 |
| 45237_at   | AA142976                                                                                     |                |                 | -2.7 |
| 58296_at   | AA131694                                                                                     |                |                 | -2.6 |
| 59792_i_at | N30160                                                                                       |                |                 | -2.6 |
| 51661_at   | AA214534                                                                                     |                |                 | -2.6 |
| 40224_s_at | AB014585                                                                                     |                | 22q13.33        | -2.5 |
| 36485_at   | small optic lobes homolog (Drosophila)                                                       | <i>SOLH</i>    | 16p13.3         | -2.5 |
| 46859_at   | AI655686                                                                                     |                | 8q12.2          | -2.5 |
| 46271_at   | FK506 binding protein 5                                                                      | <i>FKBP5</i>   | 6p21.3-21.2     | -2.5 |
| 59523_at   | AI735283                                                                                     |                |                 | -2.5 |
| 40088_at   | nuclear receptor interacting protein 1                                                       | <i>NRIP1</i>   | 21q11.2         | -2.4 |
| 40362_at   | nuclear factor of kappa light polypeptide gene enhancer in B-cells 2 (p49/p100)              | <i>NFKB2</i>   | 10q24           | -2.4 |
| 55686_at   | AA143793                                                                                     |                |                 | -2.4 |
| 56538_at   | AI967939                                                                                     |                |                 | -2.4 |
| 1753_s_at  | RAD23 homolog A ( <i>S. cerevisiae</i> )                                                     | <i>RAD23A</i>  | 19p13.2         | -2.4 |
| 43717_at   | AA194428                                                                                     |                |                 | -2.4 |
| 40570_at   | forkhead box O1A (rhabdomyosarcoma)                                                          | <i>FOXO1A</i>  | 13q14.1         | -2.4 |
| 43697_at   | AA504249                                                                                     |                |                 | -2.3 |
| 57922_at   | AI300085                                                                                     |                | 19p13.3         | -2.3 |
| 35817_at   | myelin basic protein                                                                         | <i>MBP</i>     | 18q23           | -2.3 |
| 37018_at   | H1 histone family, member 2                                                                  | <i>H1F2</i>    | 6p21.3          | -2.3 |
| 46944_at   | AI276680                                                                                     |                |                 | -2.3 |
| 41098_at   | dishevelled associated activator of morphogenesis 2                                          | <i>DAAM2</i>   | 6p21.1          | -2.3 |
| 767_at     | myosin, heavy polypeptide 11, smooth muscle                                                  | <i>MYH11</i>   | 16p13.13-p13.12 | -2.3 |
| 58261_at   | W56390                                                                                       |                | 8q12.3          | -2.3 |
| 41690_at   | AL049471                                                                                     | □              | □               | -2.2 |
| 40522_at   | glutamate-ammonia ligase (glutamine synthase)                                                | <i>GLUL</i>    | 1q31            | -2.2 |
| 35358_at   | AB028998                                                                                     |                | 12q12           | -2.2 |
| 41861_at   | AL050019                                                                                     |                | 1p36.33         | -2.2 |
| 41827_f_at | AI932613                                                                                     | □              | □               | -2.2 |
| 40560_at   | T-box 2                                                                                      | <i>TBX2</i>    | 17q23           | -2.2 |
| 48095_at   | N32521                                                                                       |                | 20p12.3         | -2.2 |
| 52186_at   | AI560064                                                                                     |                | 1q25            | -2.2 |
| 32775_r_at | phospholipid scramblase 1                                                                    | <i>PLSCR1</i>  | 3q23            | -2.2 |
| 38526_at   | phosphodiesterase 4D, cAMP-specific (phosphodiesterase E3 dunce homolog, <i>Drosophila</i> ) | <i>PDE4D</i>   | 5q12            | -2.1 |

|             |                                                                                                |                 |                 |      |
|-------------|------------------------------------------------------------------------------------------------|-----------------|-----------------|------|
| 33858_at    | likely ortholog of rat p47                                                                     | <i>p47</i>      | 20p13           | -2.1 |
| 1052_s_at   | CCAAT/enhancer binding protein (C/EBP), delta                                                  | <i>CEBPD</i>    | 8p11.2-p11.1    | -2.1 |
| 35742_at    | U95740                                                                                         | <i>BC008967</i> | 16p13.2         | -2.1 |
| 45328_at    | AI922109                                                                                       |                 |                 | -2.1 |
| 46644_at    | transmembrane, prostate androgen induced RNA                                                   | <i>TMEPAI</i>   | 20q13.31-q13.33 | -2.1 |
| 275_at      | dual specificity phosphatase 3 (vaccinia virus phosphatase VH1-related)                        | <i>DUSP3</i>    | 17q21           | -2.1 |
| 45320_at    | AI949414                                                                                       |                 |                 | -2.1 |
| 32177_s_at  | AC004084                                                                                       | □               | 7q22-q31.1      | -2.1 |
| 37041_at    | AB023160                                                                                       | <i>Apg4B</i>    | 2q37.3          | -2.1 |
| 43106_at    | W25526                                                                                         |                 | 11q23.2         | -2.1 |
| 43225_i_at  | AA001052                                                                                       |                 |                 | -2.1 |
| 160044_g_at | aconitase 2, mitochondrial                                                                     | <i>ACO2</i>     | 22q13.2-q13.31  | -2.1 |
| 59737_at    | T90504                                                                                         |                 | 20p12.3         | -2.1 |
| 36991_at    | splicing factor, arginine/serine-rich 4                                                        | <i>SFRS4</i>    | 1p35.2          | -2.1 |
| 36680_at    | amylase, alpha 2B; pancreatic                                                                  | <i>AMY2B</i>    | 1p21            | -2.0 |
| 52791_at    | thiopurine S-methyltransferase                                                                 | <i>TPMT</i>     | 6p22.3          | -2.0 |
| 1979_s_at   | nucleolar protein 1 (120 kDa)                                                                  | <i>NOL1</i>     | 12p13           | -2.0 |
| 34817_s_at  | ataxin 2 related protein                                                                       | <i>A2LP</i>     | 7               | -2.0 |
| 32172_at    | SMART/HDAC1 associated repressor protein                                                       | <i>SHARP</i>    | 1p36.33-p36.11  | -2.0 |
| 36694_at    | potassium voltage-gated channel, delayed-rectifier, subfamily S, member 3                      | <i>KCNS3</i>    | 2p24            | -2.0 |
| 54416_at    | AI793153                                                                                       |                 |                 | -2.0 |
| 59419_f_at  | AI889142                                                                                       |                 |                 | -2.0 |
| 48438_at    | AI022739                                                                                       |                 |                 | -2.0 |
| 58796_at    | AA576036                                                                                       |                 |                 | -1.9 |
| 53874_at    | AI754487                                                                                       |                 | 16q23.1         | -1.9 |
| 39037_at    | myeloid/lymphoid or mixed-lineage leukemia (trithorax homolog, Drosophila); translocated to, 2 | <i>MLLT2</i>    | 4q21            | -1.9 |
| 41399_at    | AB029034                                                                                       |                 | X               | -1.9 |
| 37543_at    | Rac/Cdc42 guanine nucleotide exchange factor (GEF) 6                                           | <i>ARHGEF6</i>  | Xq26            | -1.9 |
| 39950_at    | acid sphingomyelinase-like phosphodiesterase                                                   | <i>ASM3A</i>    | 6               | -1.9 |
| 34256_at    | sialyltransferase 9 (CMP-NeuAc:lactosylceramide alpha-2,3-sialyltransferase; GM3 synthase)     | <i>SIAT9</i>    | 2p11.2          | -1.9 |
| 40448_at    | zinc finger protein 36, C3H type, homolog (mouse)                                              | <i>ZFP36</i>    | 19q13.1         | -1.9 |
| 34355_at    | methyl CpG binding protein 2 (Rett syndrome)                                                   | <i>MECP2</i>    | Xq28            | -1.9 |
| 45728_at    | Toll-interacting protein                                                                       | <i>TOLLIP</i>   | 11p             | -1.9 |
| 52983_at    | l(3)mbt-like (Drosophila)                                                                      | <i>L3MBTL</i>   | 20p13           | -1.9 |
| 38968_at    | SH3-domain binding protein 5 (BTK-associated)                                                  | <i>SH3BP5</i>   | 3p24.3          | -1.9 |
| 32176_at    | Ca <sup>2+</sup> -promoted Ras inactivator                                                     | <i>CAPRI</i>    | 7q22-q31.1      | -1.9 |
| 656_at      | inositol polyphosphate-1-phosphatase                                                           | <i>INPP1</i>    | 2q32            | -1.9 |
| 33408_at    | AB023151                                                                                       |                 | 10p15.3         | -1.9 |
| 54789_at    | AI376450                                                                                       |                 |                 | -1.9 |
| 33571_at    | phosphorylase kinase, gamma 1 (muscle)                                                         | <i>PHKG1</i>    | 7p12-q21        | -1.9 |
| 38908_s_at  | REV3-like, catalytic subunit of DNA polymerase zeta (yeast)                                    | <i>REV3L</i>    | 6q21            | -1.9 |
| 1001_at     | tyrosine kinase with immunoglobulin and epidermal growth factor homology domains               | <i>TIE</i>      | 1p34-p33        | -1.9 |
| 35352_at    | aryl-hydrocarbon receptor nuclear translocator 2                                               | <i>ARNT2</i>    | 15q24           | -1.9 |
| 51699_at    | AA460692                                                                                       |                 | 4p15.2          | -1.9 |
| 34728_g_at  | S-adenosylhomocysteine hydrolase-like 1                                                        | <i>AHCYL1</i>   | 1p12            | -1.9 |
| 39708_at    | signal transducer and activator of transcription 3 (acute-phase response factor)               | <i>STAT3</i>    | 17q21           | -1.9 |
| 40490_at    | DEAD/H (Asp-Glu-Ala-Asp/His) box polypeptide 21                                                | <i>DDX21</i>    | 10q21           | -1.9 |

|            |                                                                               |                 |                 |      |
|------------|-------------------------------------------------------------------------------|-----------------|-----------------|------|
| 32676_at   | aldehyde dehydrogenase 6 family, member A1                                    | <i>ALDH6A1</i>  | 14q24.2         | -1.9 |
| 33869_at   | AL080218                                                                      | □               | □               | -1.9 |
| 37407_s_at | myosin, heavy polypeptide 11, smooth muscle                                   | <i>MYH11</i>    | 16p13.13-p13.12 | -1.8 |
| 37683_at   | ubiquitin specific protease 10                                                | <i>USP10</i>    | 16q24.1         | -1.8 |
| 36100_at   | vascular endothelial growth factor                                            | <i>VEGF</i>     | 6p12            | -1.8 |
| 41049_at   | insulin receptor substrate 1                                                  | <i>IRS1</i>     | 2q36            | -1.8 |
| 41829_at   | AB018274                                                                      |                 | 5q34            | -1.8 |
| 39827_at   | HIF-1 responsive RTP801                                                       | <i>RTP801</i>   | 10pter-q26.12   | -1.8 |
| 51223_at   | phosphoinositide-3-kinase, catalytic, beta                                    | <i>PIK3CB</i>   | 3q23            | -1.8 |
| 851_s_at   | insulin receptor substrate 1                                                  | <i>IRS1</i>     | 2q36            | -1.8 |
| 38148_at   | cryptochrome 1 (photolyase-like)                                              | <i>CRY1</i>     | 12q23-q24.1     | -1.8 |
| 35848_at   | retinoic acid induced 17                                                      | <i>RAI17</i>    | 10q23.2         | -1.8 |
| 37026_at   | core promoter element binding protein                                         | <i>COPEB</i>    | 10p15           | -1.8 |
| 37965_at   | parvin, beta                                                                  | <i>PARVB</i>    | 22q13.2-q13.33  | -1.8 |
| 40240_at   | G protein-coupled receptor, family C, group 1, member B                       | <i>GPRC5B</i>   | 16p12           | -1.8 |
| 47436_at   | AI701561                                                                      |                 |                 | -1.8 |
| 2081_s_at  | protein kinase C, theta                                                       | <i>PRKCO</i>    | 10p15           | -1.8 |
| 33831_at   | CREB binding protein (Rubinstein-Taybi syndrome)                              | <i>CREBBP</i>   | 16p13.3         | -1.8 |
| 44815_s_at | Wilms' tumour 1-associating protein                                           | <i>WTAP</i>     | 6q25-q27        | -1.8 |
| 34259_at   | AB014564                                                                      |                 | 17p13.3         | -1.8 |
| 36150_at   | AB020649                                                                      |                 | 1p36.13         | -1.8 |
| 51621_at   | W90067                                                                        |                 | 14q22.1         | -1.8 |
| 47552_g_at | AA524065                                                                      |                 | 16q24.3         | -1.7 |
| 58842_at   | AI084071                                                                      |                 | 3p26.1          | -1.7 |
| 984_g_at   | mitogen-activated protein kinase 12                                           | <i>MAPK12</i>   | 22q13.33        | -1.7 |
| 36980_at   | proline rich 2                                                                | <i>PROL2</i>    | 6q16.1          | -1.7 |
| 40846_g_at | interleukin enhancer binding factor 3, 90 kDa                                 | <i>ILF3</i>     | 19p13           | -1.7 |
| 41489_at   | transducin-like enhancer of split 1 (E(sp1) homolog, Drosophila)              | <i>TLE1</i>     | 19p13.3         | -1.7 |
| 1867_at    | CASP8 and FADD-like apoptosis regulator                                       | <i>CFLAR</i>    | 2q33-q34        | -1.7 |
| 33932_at   | G1 to S phase transition 1                                                    | <i>GSPT1</i>    | 16p13.1         | -1.7 |
| 56593_at   | AI636016                                                                      |                 |                 | -1.7 |
| 45521_s_at | AI967955                                                                      |                 | 17q11.1         | -1.7 |
| 33836_at   | ceroid-lipofuscinosis, neuronal 3, juvenile (Batten, Spielmeyer-Vogt disease) | <i>CLN3</i>     | 16p12.1         | -1.7 |
| 40027_at   | mitochondrial ATP synthase regulatory component factor B                      | <i>ATPW</i>     | 14q21.3         | -1.7 |
| 1191_s_at  | proteasome (prosome, macropain) 26S subunit, non-ATPase, 11                   | <i>PSMD11</i>   | 17q11.2         | -1.7 |
| 35135_at   | X13956                                                                        |                 | 19p13.13        | -1.7 |
| 38354_at   | CCAAT/enhancer binding protein (C/EBP), beta                                  | <i>CEBPB</i>    | 20q13.1         | -1.7 |
| 43542_at   | W75954                                                                        |                 |                 | -1.7 |
| 33414_at   | pM5 protein                                                                   | <i>PM5</i>      | 16p13.11        | -1.7 |
| 37114_at   | AT-binding transcription factor 1                                             | <i>ATBF1</i>    | 16q22.3-q23.1   | -1.6 |
| 58679_at   | AI798846                                                                      |                 | 17q25.3         | -1.6 |
| 40047_at   | AF077599                                                                      | <i>SBB103</i>   | 12q12           | -1.6 |
| 40048_at   | pumilio homolog 1 (Drosophila)                                                | <i>PUM1</i>     | 1p35.2          | -1.6 |
| 39631_at   | epithelial membrane protein 2                                                 | <i>EMP2</i>     | 16p13.2         | -1.6 |
| 38488_s_at | interleukin 15                                                                | <i>IL15</i>     | 4q31            | -1.6 |
| 40451_at   | polymerase (DNA directed), epsilon                                            | <i>POLE</i>     | 12q24.3         | -1.6 |
| 41784_at   | AL080186                                                                      |                 | 6q16.3          | -1.6 |
| 40440_at   | PAI-1 mRNA-binding protein                                                    | <i>PAI-RBP1</i> | 1p31-p22        | -1.6 |
| 41302_at   | S-adenosylhomocysteine hydrolase-like 1                                       | <i>AHCYL1</i>   | 1p12            | -1.6 |
| 31823_at   | cut-like 1, CCAAT displacement protein                                        | <i>CUTL1</i>    | 7q22            | -1.6 |

|            |                                                                                                   |                 |                |      |
|------------|---------------------------------------------------------------------------------------------------|-----------------|----------------|------|
| 39376_at   | AB014530                                                                                          |                 | 1p11.2         | -1.6 |
| 41841_at   | AF052138                                                                                          | □               | □              | -1.6 |
| 36679_at   | signal recognition particle receptor ('docking                                                    | <i>SRPR</i>     | 11q23-q24      | -1.6 |
| 34192_at   | AB011104                                                                                          |                 | 8q22.1         | -1.6 |
| 49892_at   | AI445643                                                                                          |                 | 20p11.23       | -1.6 |
| 35255_at   | RAN binding protein 7                                                                             | <i>RANBP7</i>   | 11p15.3        | -1.6 |
| 43811_at   | dudulin 2                                                                                         |                 | 2q21.2         | -1.6 |
| 36054_at   | AB020699                                                                                          |                 | 19p13.11       | -1.6 |
| 41745_at   | interferon induced transmembrane protein 3 (1-8U)                                                 | <i>IFITM3</i>   | 8q13.1         | -1.6 |
| 40441_g_at | PAI-1 mRNA-binding protein                                                                        | <i>PAI-RBP1</i> | 1p31-p22       | -1.6 |
| 40087_at   | unc-13-like (C. elegans)                                                                          | <i>UNC13</i>    | 9p12-p11       | -1.6 |
| 33394_at   | AA034074                                                                                          |                 | 16q22.1        | -1.6 |
| 38164_at   | retinitis pigmentosa GTPase regulator                                                             | <i>RPGR</i>     | Xp21.1         | -1.6 |
| 33385_g_at | calpastatin                                                                                       | <i>CAST</i>     | 5q14-q22       | -1.6 |
| 55924_at   | AA085776                                                                                          |                 | 8q24.13        | -1.6 |
| 35812_at   | transportin-SR                                                                                    | <i>TRN-SR</i>   | 7q31.1         | -1.6 |
| 493_at     | casein kinase 1, delta                                                                            | <i>CSNK1D</i>   | 17q25          | -1.6 |
| 45678_at   | AA400627                                                                                          |                 |                | -1.6 |
| 45168_at   | N98749                                                                                            |                 |                | -1.6 |
| 36238_at   | myeloid/lymphoid or mixed-lineage leukemia<br>(trithorax homolog, Drosophila); translocated to, 7 | <i>MLLT7</i>    | Xq13.1         | -1.6 |
| 46266_at   | putative mitochondrial solute carrier                                                             | <i>MRS3/4</i>   | 10q23-q24      | -1.6 |
| 35221_at   | purine-rich element binding protein A                                                             | <i>PURA</i>     | 5q31           | -1.6 |
| 36791_g_at | tropomyosin 1 (alpha)                                                                             | <i>TPM1</i>     | 15q22.1        | -1.5 |
| 36117_at   | PTK2 protein tyrosine kinase 2                                                                    | <i>PTK2</i>     | 8q24-qter      | -1.5 |
| 47907_at   | AI094180                                                                                          |                 |                | -1.5 |
| 34661_at   | AB002348                                                                                          |                 | 16p13.13       | -1.5 |
| 35187_at   | AL080216                                                                                          | □               | □              | -1.5 |
| 43502_at   | AI797276                                                                                          |                 |                | -1.5 |
| 39258_at   | AI627877                                                                                          |                 | 19p13.3        | -1.5 |
| 40244_s_at | metallo phosphoesterase                                                                           | <i>MPPE1</i>    | 18p11.21-p11.1 | -1.5 |
| 46224_at   | AA133962                                                                                          | <i>PRO0149</i>  | 16p13.2        | -1.5 |
| 41337_at   | amino-terminal enhancer of split                                                                  | <i>AES</i>      | 19p13.3        | -1.5 |
| 34887_at   | radixin                                                                                           | <i>RDX</i>      | 11q23          | -1.5 |
| 46639_at   | AA398558                                                                                          |                 |                | -1.5 |
| 38828_s_at | KH-type splicing regulatory protein (FUSE binding<br>protein 2)                                   | <i>KHSRP</i>    | 19p13.3        | -1.5 |
| 46680_at   | BRG1-binding protein ELD/OSA1                                                                     | <i>ELD/OSA1</i> | 6q25.1         | -1.5 |
| 39110_at   | eukaryotic translation initiation factor 4B                                                       | <i>EIF4B</i>    | 12q12          | -1.5 |
| 31608_g_at | VDAC1 pseudogene                                                                                  | <i>VDAC1</i>    | □              | -1.5 |
| 36002_at   | AB023229                                                                                          |                 | 18q11.2        | -1.5 |
| 39404_s_at | regulator of nonsense transcripts 1                                                               | <i>RENT1</i>    | 19p13.2-p13.11 | -1.5 |
| 38173_at   | AB028999                                                                                          |                 | 12q24.31       | -1.5 |
| 676_g_at   | interferon induced transmembrane protein 1 (9-27)                                                 | <i>IFITM1</i>   | 11             | -1.5 |
| 38794_at   | upstream binding transcription factor, RNA<br>polymerase I                                        | <i>UBTF</i>     | 17q21.3        | -1.4 |
| 34743_at   | scribble                                                                                          | <i>SCRIB</i>    | □              | -1.4 |
| 40089_at   | Williams Beuren syndrome chromosome region 20                                                     | <i>WBSCR20</i>  | □              | -1.4 |
| 35361_at   | PTEN induced putative kinase 1                                                                    | <i>PINK1</i>    | 1p36           | -1.4 |
| 33834_at   | stromal cell-derived factor 1                                                                     | <i>SDF1</i>     | 10q11.1        | -1.4 |
| 35754_at   | L40391                                                                                            | □               | □              | -1.4 |
| 44973_at   | ARF-GAP, RHO-GAP, ankyrin repeat and plekstrin<br>homology domains-containing protein 3           | <i>ARAP3</i>    | 5q31.3         | -1.4 |
| 37336_at   | UBX domain-containing 2                                                                           | <i>UBXD2</i>    | 2q14.3         | -1.4 |

|                                |                                                                                            |               |               |      |
|--------------------------------|--------------------------------------------------------------------------------------------|---------------|---------------|------|
| 37307_at                       | guanine nucleotide binding protein (G protein),<br>alpha inhibiting activity polypeptide 2 | <i>GNAI2</i>  | 3p21          | -1.4 |
| 36110_at                       | RAB5A, member RAS oncogene family                                                          | <i>RAB5A</i>  | 3p24-p22      | -1.4 |
| 37196_at                       | cadherin 5, type 2, VE-cadherin (vascular)                                                 | <i>CDH5</i>   | 16q22.1       | -1.4 |
| <b>Up-regulated probe sets</b> |                                                                                            |               |               |      |
| 32729_at                       | myosin, heavy polypeptide 3, skeletal muscle,<br>embryonic                                 | <i>MYH3</i>   | 17p13.1       | 52.2 |
| 37954_at                       | annexin A8                                                                                 | <i>ANXA8</i>  | 10q11.2       | 20.1 |
| 40657_r_at                     | adipose most abundant gene transcript 1                                                    | <i>APM1</i>   | 3q27          | 16.7 |
| 38793_at                       | troponin T2, cardiac                                                                       | <i>TNNT2</i>  | 1q32          | 16.0 |
| 33910_at                       | AL049338                                                                                   | □             | □             | 15.4 |
| 41071_at                       | serine protease inhibitor, Kazal type, 2 (acrosin-<br>trypsin inhibitor)                   | <i>SPINK2</i> | 4q11          | 14.7 |
| 36941_at                       | ALL1-fused gene from chromosome 1q                                                         | <i>AF1Q</i>   | 1q21          | 14.1 |
| 40017_at                       | AL050214                                                                                   |               | 11p11.2       | 13.2 |
| 37808_at                       | sorting nexin 7                                                                            | <i>SNX7</i>   | 1p21.2        | 13.0 |
| 36990_at                       | ubiquitin carboxyl-terminal esterase L1 (ubiquitin<br>thiolesterase)                       | <i>UCHL1</i>  | 4p14          | 13.0 |
| 45584_at                       | H10957                                                                                     |               |               | 11.6 |
| 36310_at                       | keratin, hair, acidic, 1                                                                   | <i>KRTHA1</i> | 17q12-q21     | 10.8 |
| 33442_at                       | AB002365                                                                                   |               | 9q21.31       | 10.5 |
| 38140_at                       | exostoses (multiple)-like 1                                                                | <i>EXTL1</i>  | 1p36.1        | 10.3 |
| 1401_g_at                      | granulocyte-macrophage colony-stimulating factor                                           | <i>CSF1</i>   | 5q33          | 10.1 |
| 1593_at                        | fibroblast growth factor 2 (basic)                                                         | <i>FGF2</i>   | 4q26-q27      | 10.1 |
| 34820_at                       | pleiotrophin (heparin binding growth factor 8,<br>neurite growth-promoting factor 1)       | <i>PTN</i>    | 7q33-q34      | 10.0 |
| 1788_s_at                      | dual specificity phosphatase 4                                                             | <i>DUSP4</i>  | 8p12-p11      | 9.8  |
| 40548_at                       | Bicaudal D homolog 1 (Drosophila)                                                          | <i>BICD1</i>  | 12p11.2-p11.1 | 9.7  |
| 43030_at                       | transmembrane protein with EGF-like and two<br>follistatin-like domains 2                  | <i>TMEFF2</i> | 2q32.3        | 9.6  |
| 37744_r_at                     | fasciculation and elongation protein zeta 1 (zygin I)                                      | <i>FEZ1</i>   | 11q24.2       | 9.2  |
| 42728_at                       | AI286254                                                                                   |               |               | 9.2  |
| 40693_at                       | potassium voltage-gated channel, Shab-related<br>subfamily, member 1                       | <i>KCNB1</i>  | 20q13.2       | 9.2  |
| 43816_at                       | AW025806                                                                                   |               |               | 9.1  |
| 377_g_at                       | sema domain, immunoglobulin domain (Ig), short<br>basic domain, secreted, (semaphorin) 3C  | <i>SEMA3C</i> | 7q21-q31      | 8.5  |
| 269_at                         | 2'-5'-oligoadenylate synthetase-like                                                       | <i>OASL</i>   | 12q24.2       | 8.3  |
| 41806_at                       | fibroblast growth factor 2 (basic)                                                         | <i>FGF2</i>   | 4q26-q27      | 8.3  |
| 39940_at                       | AL080094                                                                                   | □             | 8             | 8.2  |
| 37249_at                       | phosphodiesterase 8B                                                                       | <i>PDE8B</i>  | 5q13.2        | 7.9  |
| 54176_at                       | H59615                                                                                     |               |               | 7.8  |
| 38243_at                       | neural cell adhesion molecule 1                                                            | <i>NCAM1</i>  | 11q23.1       | 7.7  |
| 1831_at                        | bone morphogenetic protein 5                                                               | <i>BMP5</i>   | 6p11.1        | 7.4  |
| 34566_at                       | calcitonin-related polypeptide, beta                                                       | <i>CALCB</i>  | 11p15.2-p15.1 | 7.4  |
| 46575_at                       | AI694320                                                                                   |               |               | 7.3  |
| 57298_at                       | AA757225                                                                                   |               |               | 7.3  |
| 1317_at                        | macrophage stimulating 1 receptor (c-met-related<br>tyrosine kinase)                       | <i>MST1R</i>  | 3p21.3        | 7.2  |
| 41245_at                       | growth differentiation factor 10                                                           | <i>GDF10</i>  | 10q21.1       | 7.2  |
| 37263_at                       | gamma-glutamyl hydrolase (conjugase,<br>folylpolygammaglutamyl hydrolase)                  | <i>GGH</i>    | 8q12.1        | 7.0  |
| 38608_at                       | lectin, galactoside-binding, soluble, 7 (galectin 7)                                       | <i>LGALS7</i> | 19q13.2       | 6.9  |
| 791_g_at                       | nerve growth factor, beta polypeptide                                                      | <i>NGFB</i>   | 1p13.1        | 6.7  |
| 45948_r_at                     | R98767                                                                                     |               |               | 6.7  |
| 39593_at                       | AI432401                                                                                   | □             | □             | 6.5  |

|            |                                                                                                                                        |                  |               |     |
|------------|----------------------------------------------------------------------------------------------------------------------------------------|------------------|---------------|-----|
| 918_at     | HG4724-HT5166                                                                                                                          | □                | □             | 6.4 |
| 33702_f_at | phosphoenolpyruvate carboxykinase 1 (soluble)                                                                                          | <i>PCK1</i>      | 20q13.31      | 6.4 |
| 38279_at   | guanine nucleotide binding protein (G protein),<br>alpha z polypeptide                                                                 | <i>GNAZ</i>      | 22q11.22      | 6.3 |
| 31521_f_at | H4 histone family, member E                                                                                                            | <i>H4FE</i>      | 6p22-p21.3    | 6.1 |
| 38888_at   | leucine-rich, glioma inactivated 1                                                                                                     | <i>LG11</i>      | 10q24         | 6.0 |
| 35081_at   | fibroblast growth factor 9 (glia-activating factor)                                                                                    | <i>FGF9</i>      | 13q11-q12     | 6.0 |
| 51351_at   | AA429717                                                                                                                               |                  |               | 5.9 |
| 34898_at   | amphiregulin (schwannoma-derived growth factor)                                                                                        | <i>AREG</i>      | 4q13-q21      | 5.9 |
| 47941_at   | AI540870                                                                                                                               |                  | 3p25.1        | 5.9 |
| 41764_at   | apolipoprotein C-I                                                                                                                     | <i>APOC1</i>     | 19q13.2       | 5.9 |
| 34348_at   | serine protease inhibitor, Kunitz type, 2                                                                                              | <i>SPINT2</i>    | 19q13.1       | 5.7 |
| 37513_at   | stearoyl-CoA desaturase (delta-9-desaturase)                                                                                           | <i>SCD</i>       | 10q23-q24     | 5.7 |
| 1088_at    | brain-derived neurotrophic factor                                                                                                      | <i>BDNF</i>      | 11p13         | 5.7 |
| 35237_at   | collagen, type XXI, alpha 1                                                                                                            | <i>COL21A1</i>   | 6p12.3-p11.2  | 5.6 |
| 41714_at   | AB007924                                                                                                                               |                  | 1p21.1        | 5.5 |
| 39757_at   | syndecan 2 (heparan sulfate proteoglycan 1, cell<br>surface-associated, fibroglycan)                                                   | <i>SDC2</i>      | 8q22-q23      | 5.5 |
| 1898_at    | tripartite motif-containing 29                                                                                                         | <i>TRIM29</i>    | 11q22-q23     | 5.5 |
| 34577_at   | melanoma antigen, family A, 9                                                                                                          | <i>MAGEA9</i>    | Xq28          | 5.5 |
| 37875_at   | glycoprotein A33 (transmembrane)                                                                                                       | <i>GPA33</i>     | 1q23.2        | 5.4 |
| 1616_at    | fibroblast growth factor 9 (glia-activating factor)                                                                                    | <i>FGF9</i>      | 13q11-q12     | 5.4 |
| 1341_at    | spleen focus forming virus (SFFV) proviral<br>integration oncogene spi1                                                                | <i>SPI1</i>      | 11p11.2       | 5.4 |
| 41755_at   | AB023194                                                                                                                               |                  | 2q24.3        | 5.3 |
| 34961_at   | T cell activation, increased late expression                                                                                           | <i>TACTILE</i>   | 3q13.2        | 5.3 |
| 38212_at   | UDP-N-acetyl-alpha-D-galactosamine:(N-<br>acetylneuraminy)-galactosylglucosylceramide N-<br>acetylgalactosaminyltransferase (GalNAc-T) | <i>GALGT</i>     | 12q13.3       | 5.3 |
| 31370_at   | retinitis pigmentosa GTPase regulator interacting<br>protein 1                                                                         | <i>RPGRIP1</i>   | 14q11         | 5.3 |
| 31859_at   | matrix metalloproteinase 9 (gelatinase B, 92 kDa<br>gelatinase, 92 kDa type IV collagenase)                                            | <i>MMP9</i>      | 20q11.2-q13.1 | 5.3 |
| 33285_i_at | W26762                                                                                                                                 |                  | 1p13.1        | 5.3 |
| 34563_at   | D26361                                                                                                                                 |                  | 1pter-q31.3   | 5.3 |
| 35649_at   | cysteine dioxygenase, type I                                                                                                           | <i>CDO1</i>      | 5q22-q23      | 5.3 |
| 35438_at   | SEX gene                                                                                                                               | <i>HSSEXGENE</i> | Xq28          | 5.3 |
| 52622_at   | AA541787                                                                                                                               |                  |               | 5.2 |
| 37143_s_at | phosphoribosylformylglycinamide synthase<br>(FGAR amidotransferase)                                                                    | <i>PFAS</i>      | 17p13         | 5.2 |
| 33244_at   | chimerin (chimaerin) 2                                                                                                                 | <i>CHN2</i>      | 7p15.3        | 5.1 |
| 55426_at   | cytochrome P450 retinoid metabolizing protein                                                                                          | <i>P450RAI-2</i> | 2p12          | 5.1 |
| 34985_at   | cartilage intermediate layer protein, nucleotide<br>pyrophosphohydrolase                                                               | <i>CILP</i>      | 15q22         | 5.1 |
| 50487_at   | AA447217                                                                                                                               |                  |               | 5.1 |
| 35949_at   | AB018317                                                                                                                               |                  | 13q12.2       | 5.1 |
| 1629_s_at  | HG3187-HT3366                                                                                                                          |                  |               | 5.1 |
| 33024_at   | chymase 1, mast cell                                                                                                                   | <i>CMA1</i>      | 14q11.2       | 5.1 |
| 44957_at   | AA161255                                                                                                                               |                  |               | 5.1 |
| 39257_at   | Kruppel-like factor 12                                                                                                                 | <i>KLF12</i>     | 13q22         | 5.0 |
| 58902_r_at | R44987                                                                                                                                 |                  |               | 5.0 |
| 1044_s_at  | E2F transcription factor 5, p130-binding                                                                                               | <i>E2F5</i>      | 8q21.13       | 4.9 |
| 32239_at   | matrilin 2                                                                                                                             | <i>MATN2</i>     | 8q22          | 4.9 |
| 104_at     | POU domain, class 6, transcription factor 1                                                                                            | <i>POU6F1</i>    | 12            | 4.9 |
| 36311_at   | phosphodiesterase 1A, calmodulin-dependent                                                                                             | <i>PDE1A</i>     | 4             | 4.9 |
| 34148_at   | sine oculis homeobox homolog 3 (Drosophila)                                                                                            | <i>SIX3</i>      | 2p16-p21      | 4.9 |

|            |                                                                                                       |                    |               |     |
|------------|-------------------------------------------------------------------------------------------------------|--------------------|---------------|-----|
| 38268_at   | solute carrier family 1 (neuronal/epithelial high affinity glutamate transporter, system Xag), member | <i>SLC1A1</i>      | 9p24          | 4.9 |
| 38236_at   | glutamate receptor, ionotropic, N-methyl D-aspartate 2A                                               | <i>GRIN2A</i>      | 16p13.2       | 4.9 |
| 1736_at    | insulin-like growth factor binding protein 6                                                          | <i>IGFBP6</i>      | 12q13         | 4.8 |
| 39273_at   | AL022718                                                                                              | □                  | X             | 4.8 |
| 34331_at   | EphB1                                                                                                 | <i>EPHB1</i>       | 3q21-q23      | 4.8 |
| 38535_at   | distal-less homeobox 4                                                                                | <i>DLX4</i>        | 17q21.33      | 4.8 |
| 59176_r_at | AA700040                                                                                              |                    |               | 4.7 |
| 38059_g_at | dermatopontin                                                                                         | <i>DPT</i>         | 1q12-q23      | 4.7 |
| 37925_r_at | apolipoprotein M                                                                                      | <i>G3A</i>         | 6p21.31       | 4.7 |
| 32712_at   | myelin transcription factor 1-like                                                                    | <i>MYT1L</i>       | 2p25.3        | 4.7 |
| 33733_at   | ATP-binding cassette, sub-family G (WHITE), member 2                                                  | <i>ABCG2</i>       | 4q22          | 4.7 |
| 50931_at   | AI269596                                                                                              |                    |               | 4.7 |
| 34475_at   | L34408                                                                                                | □                  | 4p16.3        | 4.6 |
| 34972_s_at | dynein, axonemal, heavy polypeptide 17                                                                | <i>DNAH17</i>      | 17q25         | 4.6 |
| 871_s_at   | hepatic leukemia factor                                                                               | <i>HLF</i>         | 17q22         | 4.6 |
| 32385_at   | AL050032                                                                                              | □                  | □             | 4.6 |
| 55074_at   | W27376                                                                                                |                    | 19q13.33      | 4.6 |
| 1714_at    | ras responsive element binding protein 1                                                              | <i>RREB1</i>       | 6p25          | 4.5 |
| 38885_at   | DNA2 DNA replication helicase 2-like (yeast)                                                          | <i>DNA2L</i>       | 10q21.3-q22.1 | 4.5 |
| 38627_at   | hepatic leukemia factor                                                                               | <i>HLF</i>         | 17q22         | 4.5 |
| 33296_at   | AB020643                                                                                              |                    | 15q22.31      | 4.5 |
| 40921_at   | CDC14 cell division cycle 14 homolog B (S. cerevisiae)                                                | <i>CDC14B</i>      | 9q22.32       | 4.4 |
| 37530_s_at | reelin                                                                                                | <i>RELN</i>        | 7q22          | 4.4 |
| 31321_at   | pancreatic beta cell growth factor                                                                    | <i>INGAP</i>       |               | 4.4 |
| 37259_at   | serine (or cysteine) proteinase inhibitor, clade I (neuroserpin), member 1                            | <i>SERPINI1</i>    | 3q26.31       | 4.4 |
| 32074_at   | DNA cross-link repair 1A (PSO2 homolog, S. cerevisiae)                                                | <i>DCLRE1A</i>     | 10q25.1       | 4.3 |
| 40699_at   | CD8 antigen, alpha polypeptide (p32)                                                                  | <i>CD8A</i>        | 2p12          | 4.3 |
| 37414_at   | solute carrier family 22 (organic cation transporter), member 1-like antisense                        | <i>SLC22A1LS</i>   | 11p15.5       | 4.3 |
| 53618_at   | AI758937                                                                                              |                    |               | 4.3 |
| 38293_s_at | homeobox D3                                                                                           | <i>HOXD3</i>       | 2q31-q37      | 4.3 |
| 36182_at   | adenomatous polyposis coli                                                                            | <i>APC</i>         | 5q21-q22      | 4.3 |
| 41001_at   | likely ortholog of mouse rabphilin 3A                                                                 | <i>RPH3A</i>       | 12q24.11      | 4.3 |
| 50995_at   | H86648                                                                                                |                    |               | 4.3 |
| 34202_at   | nectin 3                                                                                              | <i>KFZP566B084</i> | 3q13          | 4.3 |
| 37468_at   | Janus kinase 2 (a protein tyrosine kinase)                                                            | <i>JAK2</i>        | 9p24          | 4.2 |
| 37203_at   | carboxylesterase 1 (monocyte/macrophage serine esterase 1)                                            | <i>CES1</i>        | 16q13-q22.1   | 4.2 |
| 36212_at   | AL049218                                                                                              | □                  | □             | 4.2 |
| 39766_r_at | polymerase (RNA) II (DNA directed) polypeptide K (7.0 kDa)                                            | <i>POLR2K</i>      | 8q23.1        | 4.2 |
| 589_at     | steroid-5-alpha-reductase, alpha polypeptide 1 (3-oxo-5-alpha-steroid delta-4-dehydrogenase alpha 1)  | <i>SRD5A1</i>      | 5p15          | 4.2 |
| 37060_at   | U79289                                                                                                | □                  | □             | 4.2 |
| 37798_at   | chromosome 8 open reading frame 2                                                                     | <i>C8orf2</i>      | 8p11.2        | 4.2 |
| 35699_at   | BUB1 budding uninhibited by benzimidazoles 1 homolog beta (yeast)                                     | <i>BUB1B</i>       | 15q15         | 4.1 |
| 32279_at   | glutamate decarboxylase 2 (pancreatic islets and brain, 65 kDa)                                       | <i>GAD2</i>        | 10p11.23      | 4.1 |
| 1062_g_at  | interleukin 10 receptor, alpha                                                                        | <i>IL10RA</i>      | 11q23         | 4.1 |
| 55832_at   | AA043349                                                                                              |                    |               | 4.1 |

|            |                                                                                                                                                               |                 |                |     |
|------------|---------------------------------------------------------------------------------------------------------------------------------------------------------------|-----------------|----------------|-----|
| 41626_at   | timeless homolog (Drosophila)                                                                                                                                 | <i>TIMELESS</i> | 12q12-q13      | 4.0 |
| 36302_f_at | melanoma antigen, family A, 4                                                                                                                                 | <i>MAGEA4</i>   | Xq28           | 4.0 |
| 39209_r_at | pro-platelet basic protein (includes platelet basic protein, beta-thromboglobulin, connective tissue-activating peptide III, neutrophil-activating peptide-1) | <i>PPBP</i>     | 4q12-q13       | 4.0 |
| 39990_at   | ISL1 transcription factor, LIM/homeodomain, (islet-1)                                                                                                         | <i>ISL1</i>     | 5q11.1         | 4.0 |
| 33324_s_at | cell division cycle 2, G1 to S and G2 to M                                                                                                                    | <i>CDC2</i>     | 10q21.1        | 4.0 |
| 35732_at   | AL031427                                                                                                                                                      |                 | 1p33-p32.1     | 4.0 |
| 40586_at   | eukaryotic translation elongation factor 1 epsilon 1                                                                                                          | <i>EEF1E1</i>   | 6p24.3-p25.1   | 4.0 |
| 35315_at   | orosomucoid 1                                                                                                                                                 | <i>ORM1</i>     | 9q31-q32       | 4.0 |
| 39204_at   | AF090097                                                                                                                                                      | □               | 2              | 3.9 |
| 1177_at    | HG2465-HT4871                                                                                                                                                 |                 |                | 3.9 |
| 46898_at   | AI819052                                                                                                                                                      |                 |                | 3.9 |
| 43708_at   | R10307                                                                                                                                                        |                 |                | 3.9 |
| 31558_at   | Hr44 antigen                                                                                                                                                  | <i>HR44</i>     |                | 3.9 |
| 39158_at   | activating transcription factor 5                                                                                                                             | <i>ATF5</i>     | 19q13.3        | 3.9 |
| 40733_f_at | msh homeobox homolog 2 (Drosophila)                                                                                                                           | <i>MSX2</i>     | 5q34-q35       | 3.9 |
| 856_at     | CD4 receptor {exons 1 and 2} [human, T-lymphocyte, mRNA, 3429 nt]                                                                                             | □               | □              | 3.9 |
| 527_at     | centromere protein A (17 kDa)                                                                                                                                 | <i>CENPA</i>    | 2p24-p21       | 3.9 |
| 38005_at   | nucleotide-sugar transporter similar to <i>C. elegans</i> sqv-7                                                                                               | <i>SQV7L</i>    | 9q22.32        | 3.9 |
| 40682_at   | glycogen synthase 2 (liver)                                                                                                                                   | <i>GYS2</i>     | 12p12.2        | 3.9 |
| 36345_g_at | coagulation factor II (thrombin) receptor-like 1                                                                                                              | <i>F2RL1</i>    | 5q13           | 3.8 |
| 37073_at   | eyes absent homolog 1 (Drosophila)                                                                                                                            | <i>EYA1</i>     | 8q13.3         | 3.8 |
| 41272_s_at | W29031                                                                                                                                                        |                 | 19p13.12       | 3.8 |
| 34730_g_at | trophinin                                                                                                                                                     | <i>TRO</i>      | Xp11.22-p11.21 | 3.8 |
| 38630_at   | AL080192                                                                                                                                                      | □               | □              | 3.8 |
| 37464_at   | peroxisome biogenesis factor 13                                                                                                                               | <i>PEX13</i>    | 2p14-p16       | 3.8 |
| 46141_at   | thrombospondin                                                                                                                                                |                 | 6q22.33        | 3.8 |
| 41863_at   | AF070623                                                                                                                                                      | □               | □              | 3.7 |
| 38474_at   | cystathionine-beta-synthase                                                                                                                                   | <i>CBS</i>      | 21q22.3        | 3.7 |
| 35647_at   | xeroderma pigmentosum, complementation group C                                                                                                                | <i>XPC</i>      | 3p25           | 3.7 |
| 53739_at   | AI041543                                                                                                                                                      |                 |                | 3.7 |
| 41025_r_at | glycophorin E                                                                                                                                                 | <i>GYPE</i>     | 4q28-q31       | 3.7 |
| 42874_at   | AA256835                                                                                                                                                      |                 |                | 3.7 |
| 36759_at   | cholinergic receptor, muscarinic 3                                                                                                                            | <i>CHRM3</i>    | 1q41-q44       | 3.7 |
| 34426_at   | major histocompatibility complex, class I-like sequence                                                                                                       | <i>HLALS</i>    | 1q25.3         | 3.7 |
| 32778_at   | inositol 1,4,5-trisphosphate receptor, type 1                                                                                                                 | <i>ITPR1</i>    | 3p26-p25       | 3.7 |
| 37701_at   | regulator of G-protein signalling 2, 24 kDa                                                                                                                   | <i>RGS2</i>     | 1q31           | 3.7 |
| 39476_at   | Z49995                                                                                                                                                        | □               | 2              | 3.7 |
| 32426_f_at | melanoma antigen, family A, 1 (directs expression of antigen MZ2-E)                                                                                           | <i>MAGEA1</i>   | Xq28           | 3.6 |
| 35679_s_at | dipeptidylpeptidase VI                                                                                                                                        | <i>DPP6</i>     | 7q36.1-q36.2   | 3.6 |
| 31498_f_at | G antigen 6                                                                                                                                                   | <i>GAGE6</i>    | Xp11.4-p11.2   | 3.6 |
| 32919_at   | AC004010                                                                                                                                                      | □               | □              | 3.6 |
| 35236_g_at | reversion-inducing-cysteine-rich protein with kazal motifs                                                                                                    | <i>RECK</i>     | 9p13-p12       | 3.6 |
| 40805_at   | AB007900                                                                                                                                                      |                 | 14q24.1        | 3.6 |
| 53353_at   | AI492910                                                                                                                                                      |                 |                | 3.6 |
| 50307_at   | general transcription factor IIIA                                                                                                                             | <i>GTF3A</i>    | 13q12.3-q13.1  | 3.6 |
| 45437_at   | W25990                                                                                                                                                        |                 |                | 3.5 |
| 40684_at   | GTP cyclohydrolase I feedback regulatory protein                                                                                                              | <i>GCHFR</i>    | 15q15          | 3.5 |
| 41019_at   | phosducin-like                                                                                                                                                | <i>PDCL</i>     | 9q12-q13       | 3.5 |

|            |                                                                                                                                          |                 |              |     |
|------------|------------------------------------------------------------------------------------------------------------------------------------------|-----------------|--------------|-----|
| 41872_at   | deafness, autosomal dominant 5                                                                                                           | <i>DFNA5</i>    | 7p15         | 3.5 |
| 40983_s_at | W28830                                                                                                                                   |                 | 17p13.3      | 3.5 |
| 38057_at   | dermatopontin                                                                                                                            | <i>DPT</i>      | 1q12-q23     | 3.5 |
| 33554_at   | AF007131                                                                                                                                 | □               | □            | 3.4 |
| 39591_s_at | fibrinogen-like 2                                                                                                                        | <i>FGL2</i>     | 7q11.23      | 3.4 |
| 36045_at   | RNA helicase family                                                                                                                      | <i>RNAH</i>     | 6q16         | 3.4 |
| 32907_at   | 5-hydroxytryptamine (serotonin) receptor 6                                                                                               | <i>HTR6</i>     | 1p36-p35     | 3.4 |
| 33227_at   | interleukin 10 receptor, beta                                                                                                            | <i>IL10RB</i>   | 21q22.11     | 3.4 |
| 37862_at   | dihydrolipoamide branched chain transacylase (E2 component of branched chain keto acid dehydrogenase complex; maple syrup urine disease) | <i>DBT</i>      | 1p31         | 3.4 |
| 32527_at   | adipose specific 2                                                                                                                       | <i>APM2</i>     | 10q23.32     | 3.4 |
| 2027_at    | S100 calcium binding protein A2                                                                                                          | <i>S100A2</i>   | 1q21         | 3.3 |
| 50609_at   | R77106                                                                                                                                   |                 |              | 3.3 |
| 39224_at   | centaurin, delta 1                                                                                                                       | <i>CENTD1</i>   | 4p15.1       | 3.3 |
| 32882_at   | sterol O-acyltransferase 2                                                                                                               | <i>SOAT2</i>    | 12q12        | 3.3 |
| 43488_at   | CDw92 antigen                                                                                                                            | <i>CDW92</i>    | 9q31.2       | 3.3 |
| 33742_f_at | ATPase, H <sup>+</sup> transporting, lysosomal 50/57 kDa V1 subunit H                                                                    | <i>ATP6V1H</i>  | 8p22-q22.3   | 3.3 |
| 47888_at   | AI659222                                                                                                                                 |                 |              | 3.2 |
| 42589_r_at | W81668                                                                                                                                   |                 |              | 3.2 |
| 40513_at   | protein phosphatase 3 (formerly 2B), regulatory subunit B (19 kDa), alpha isoform (calcineurin B, type I)                                | <i>PPP3R1</i>   | 2p15         | 3.2 |
| 37412_at   | phosphatidylinositol-4-phosphate 5-kinase, type II, alpha                                                                                | <i>PIP5K2A</i>  | 10p11.23     | 3.2 |
| 36939_at   | glycoprotein M6A                                                                                                                         | <i>GPM6A</i>    | 4q34         | 3.1 |
| 36487_at   | short stature homeobox 2                                                                                                                 | <i>SHOX2</i>    | 3q25-q26.1   | 3.1 |
| 1097_s_at  | chemokine (C-C motif) receptor 7                                                                                                         | <i>CCR7</i>     | 17q12-q21.2  | 3.1 |
| 39124_r_at | transient receptor potential cation channel, subfamily C, member 1                                                                       | <i>TRPC1</i>    | 3q22-q24     | 3.0 |
| 41859_at   | uronyl-2-sulfotransferase                                                                                                                | <i>UST</i>      | 6q24.3-q25.1 | 3.0 |
| 39026_r_at | maternally expressed 3                                                                                                                   | <i>MEG3</i>     | 14q32        | 3.0 |
| 40024_at   | src homology three (SH3) and cysteine rich domain                                                                                        | <i>STAC</i>     | 3p22.3       | 3.0 |
| 33732_at   | adaptor-related protein complex 4, mu 1 subunit                                                                                          | <i>AP4M1</i>    | 7q11.1       | 3.0 |
| 36092_at   | AL080213                                                                                                                                 | □               | □            | 3.0 |
| 40954_at   | FXYP domain-containing ion transport regulator 2                                                                                         | <i>FXYP2</i>    | 11q23        | 3.0 |
| 32526_at   | AA149644                                                                                                                                 | <i>FLJ14529</i> | 11q25        | 3.0 |
| 2053_at    | cadherin 2, type 1, N-cadherin (neuronal)                                                                                                | <i>CDH2</i>     | 18q11.2      | 2.9 |
| 34445_at   | AB007940                                                                                                                                 |                 | 1q24-q25     | 2.9 |
| 38386_r_at | glutathione synthetase                                                                                                                   | <i>GSS</i>      | 20q11.2      | 2.9 |
| 41480_at   | RAD51 homolog C ( <i>S. cerevisiae</i> )                                                                                                 | <i>RAD51C</i>   | 17q22-q23    | 2.9 |
| 35525_at   | solute carrier family 17 (sodium phosphate), member 4                                                                                    | <i>SLC17A4</i>  | 6p22-p21.3   | 2.9 |
| 44335_at   | AA033521                                                                                                                                 |                 | 16q22.3      | 2.9 |
| 38245_i_at | AI097085                                                                                                                                 | □               | □            | 2.8 |
| 52502_at   | N49237                                                                                                                                   |                 |              | 2.8 |
| 39456_at   | AF090100                                                                                                                                 | □               | 2            | 2.8 |
| 50402_at   | AA479402                                                                                                                                 |                 | 2q33.1       | 2.8 |
| 57055_i_at | pp21 homolog                                                                                                                             | <i>LOC51186</i> | Xq22.1       | 2.8 |
| 173_at     | cadherin 18, type 2                                                                                                                      | <i>CDH18</i>    | 5p15.2-p15.1 | 2.7 |
| 55648_at   | AI203021                                                                                                                                 |                 |              | 2.7 |
| 35341_at   | ring finger protein 15                                                                                                                   | <i>RNF15</i>    | 6p21.3       | 2.7 |
| 45714_at   | AA436930                                                                                                                                 |                 | 16p13.11     | 2.7 |
| 48740_s_at | retinoic acid induced 14                                                                                                                 | <i>RAI14</i>    | 5p13.3-p13.2 | 2.7 |

|            |                                                                                         |                  |               |     |
|------------|-----------------------------------------------------------------------------------------|------------------|---------------|-----|
| 32753_at   | splicing factor 3b, subunit 3, 130 kDa                                                  | <i>SF3B3</i>     | 16q22.3       | 2.7 |
| 56375_at   | androgen induced protein                                                                | <i>AIG-1</i>     | 6q24.1-q24.2  | 2.7 |
| 376_at     | sema domain, immunoglobulin domain (Ig), short basic domain, secreted, (semaphorin) 3C  | <i>SEMA3C</i>    | 7q21-q31      | 2.7 |
| 48854_i_at | AW025683                                                                                |                  |               | 2.7 |
| 41847_at   | interleukin 24                                                                          | <i>IL24</i>      | 1q32          | 2.6 |
| 45199_at   | W73819                                                                                  |                  |               | 2.6 |
| 38881_i_at | tripartite motif-containing 16                                                          | <i>TRIM16</i>    | 17p11.2       | 2.6 |
| 36569_at   | tetranectin (plasminogen binding protein)                                               | <i>TNA</i>       | 3p22-p21.3    | 2.6 |
| 31843_at   | estrogen-related receptor gamma                                                         | <i>ESRRG</i>     | 1q41          | 2.6 |
| 54668_at   | W88427                                                                                  |                  |               | 2.6 |
| 39116_at   | putative membrane protein                                                               | <i>LOC54499</i>  | 1q22-q25      | 2.5 |
| 52885_r_at | AL046071                                                                                |                  |               | 2.5 |
| 39674_r_at | extracellular matrix protein 2, female organ and adipocyte specific                     | <i>ECM2</i>      | 9q22.3        | 2.5 |
| 33252_at   | MCM3 minichromosome maintenance deficient 3 ( <i>S. cerevisiae</i> )                    | <i>MCM3</i>      | 6p12          | 2.5 |
| 35641_g_at | core-binding factor, runt domain, alpha subunit 2; translocated to, 1; cyclin D-related | <i>CBFA2T1</i>   | 8q22          | 2.5 |
| 56694_at   | W69216                                                                                  |                  |               | 2.4 |
| 57214_at   | N95620                                                                                  | <i>PP1044</i>    | 17p13.2       | 2.4 |
| 54515_at   | chromosome 20 open reading frame 161                                                    | <i>C20orf161</i> | 20q13.11      | 2.4 |
| 36073_at   | neccdin homolog (mouse)                                                                 | <i>NDN</i>       | 15q11.2-q12   | 2.4 |
| 53717_at   | AA701033                                                                                |                  |               | 2.4 |
| 50083_at   | AI669535                                                                                |                  |               | 2.4 |
| 46183_at   | RAB23, member RAS oncogene family                                                       | <i>RAB23</i>     | 6p11.2-p12.3  | 2.4 |
| 45501_s_at | AI984087                                                                                |                  | 17q11.2       | 2.4 |
| 46275_at   | N45231                                                                                  |                  |               | 2.3 |
| 52633_at   | AA993206                                                                                |                  |               | 2.3 |
| 33436_at   | SRY (sex determining region Y)-box 9 (campomelic dysplasia, autosomal sex-reversal)     | <i>SOX9</i>      | 17q24.3-q25.1 | 2.3 |
| 50113_at   | growth differentiation factor 11                                                        | <i>GDF11</i>     | 12q12         | 2.3 |
| 56428_at   | hematological and neurological expressed 1                                              | <i>HNI</i>       | 17q25.3       | 2.3 |
| 52903_at   | brain specific protein                                                                  | <i>LOC51673</i>  | 16q23.1       | 2.3 |
| 55518_at   | tachykinin 3 (neuromedin K, neurokinin beta)                                            | <i>TAC3</i>      | 12q13-q21     | 2.3 |
| 34859_at   | melanoma antigen, family D, 2                                                           | <i>MAGED2</i>    | Xp11.4-p11.1  | 2.3 |
| 34337_s_at | putative DNA binding protein                                                            | <i>M96</i>       | 1p22.1        | 2.3 |
| 52913_at   | AA778521                                                                                |                  |               | 2.3 |
| 37783_at   | AF070575                                                                                | □                | □             | 2.3 |
| 33421_s_at | sterol-C5-desaturase (ERG3 delta-5-desaturase homolog, fungal)-like                     | <i>SC5DL</i>     | 11q23.3       | 2.3 |
| 35519_at   | AL049431                                                                                | □                | □             | 2.3 |
| 39713_at   | putative DNA/chromatin binding motif                                                    | <i>PLU-1</i>     | 1q32.1        | 2.3 |
| 52170_at   | endothelial differentiation, lysophosphatidic acid G-protein-coupled receptor, 2        | <i>EDG2</i>      | 9q32          | 2.2 |
| 38655_at   | AI525633                                                                                |                  | 12q13.1       | 2.2 |
| 51190_at   | AI810042                                                                                |                  | 1q21.2        | 2.2 |
| 37563_at   | SLIT-ROBO Rho GTPase-activating protein 3                                               | <i>SRGAP3</i>    | 3p25.3        | 2.2 |
| 35227_at   | retinoblastoma binding protein 8                                                        | <i>RBBP8</i>     | 18q11.2       | 2.2 |
| 44227_at   | AA450253                                                                                |                  |               | 2.2 |
| 46694_at   | HNOEL-iso protein                                                                       | <i>HNOEL-iso</i> | 1p13.1        | 2.2 |
| 45343_at   | APR-1 protein                                                                           | <i>MAGEH1</i>    | Xp11.22       | 2.2 |
| 40712_at   | a disintegrin and metalloproteinase domain 8                                            | <i>ADAM8</i>     | 10q26.3       | 2.2 |
| 46126_at   | oligodendrocyte transcription factor 1                                                  | <i>OLIG1</i>     | 21q22.11      | 2.2 |
| 59008_i_at | AI815758                                                                                |                  |               | 2.2 |
| 39503_s_at | dihydropyrimidinase-like 4                                                              | <i>DPYSL4</i>    | 10q26         | 2.2 |

|            |                                                                                      |                |               |     |
|------------|--------------------------------------------------------------------------------------|----------------|---------------|-----|
| 32116_at   | expressed in activated T/LAK lymphocytes                                             | <i>LAK-4P</i>  | 17q25         | 2.2 |
| 39182_at   | epithelial membrane protein 3                                                        | <i>EMP3</i>    | 19q13.3       | 2.2 |
| 46870_at   | AI686198                                                                             |                |               | 2.1 |
| 44591_at   | AW015571                                                                             |                |               | 2.1 |
| 2036_s_at  | CD44 antigen (homing function and Indian blood group system)                         | <i>CD44</i>    | 11p13         | 2.1 |
| 36905_at   | mitogen-activated protein kinase kinase kinase 7                                     | <i>MAP3K7</i>  | 6q16.1-q16.3  | 2.1 |
| 32362_r_at | topoisomerase (DNA) III beta                                                         | <i>TOP3B</i>   | 22q11         | 2.1 |
| 287_at     | activating transcription factor 3                                                    | <i>ATF3</i>    | 1q32.2        | 2.1 |
| 46845_at   | AI027546                                                                             |                |               | 2.1 |
| 45772_at   | sarcolemma associated protein                                                        | <i>SLMAP</i>   | 3p21.2-p14.3  | 2.1 |
| 47492_at   | AI742449                                                                             |                | 1p36.13       | 2.1 |
| 43307_at   | N40551                                                                               |                |               | 2.1 |
| 39995_s_at | WW domain containing oxidoreductase                                                  | <i>WWOX</i>    | 16q23.3-q24.1 | 2.0 |
| 52008_at   | AA058832                                                                             |                |               | 2.0 |
| 43418_at   | melanoma antigen, family D, 1                                                        | <i>MAGED1</i>  | Xp11.23       | 2.0 |
| 50825_at   | W23499                                                                               |                |               | 2.0 |
| 44963_r_at | R43897                                                                               |                |               | 2.0 |
| 57718_at   | tumor endothelial marker 8                                                           | <i>TEM8</i>    | 4             | 2.0 |
| 34407_at   | retinoic acid receptor responder (tazarotene induced) 2                              | <i>RARRES2</i> | 7q35          | 2.0 |
| 38258_at   | U79290                                                                               | □              | □             | 2.0 |
| 34178_at   | zinc finger protein 297                                                              | <i>ZNF297</i>  | 6p21.3        | 2.0 |
| 47139_at   | AA481256                                                                             |                | 1q42.12       | 1.9 |
| 47483_at   | AI659612                                                                             |                | 1q12          | 1.9 |
| 41139_at   | melanoma antigen, family D, 1                                                        | <i>MAGED1</i>  | Xp11.23       | 1.9 |
| 55585_at   | prostaglandin F2 receptor negative regulator                                         | <i>PTGFRN</i>  | 1p13.1-q21.3  | 1.9 |
| 40486_g_at | AA176780                                                                             |                | 11p11.2       | 1.9 |
| 35254_at   | FLN29 gene product                                                                   | <i>FLN29</i>   | 12q           | 1.9 |
| 42250_at   | AL048966                                                                             |                |               | 1.9 |
| 34659_at   | nucleoporin 155 kDa                                                                  | <i>NUP155</i>  | 5p13          | 1.9 |
| 38860_at   | phosphodiesterase 4C, cAMP-specific (phosphodiesterase E1 dunce homolog, Drosophila) | <i>PDE4C</i>   | 19p13.11      | 1.9 |
| 35989_at   | myozenin 2                                                                           | <i>MYOZ2</i>   | 4q26-q27      | 1.9 |
| 41438_at   | oxysterol binding protein-like 8                                                     | <i>OSBPL8</i>  | 12q21.1       | 1.9 |
| 56458_at   | calcium/calmodulin-dependent protein kinase (CaM kinase) II delta                    | <i>CAMK2D</i>  | 4q25          | 1.9 |
| 35369_at   | AB023154                                                                             |                | 11q12.3       | 1.9 |
| 47970_at   | olfactomedin 2                                                                       | <i>OLFM2</i>   | 19p13.2       | 1.9 |
| 50965_at   | RAB26, member RAS oncogene family                                                    | <i>RAB26</i>   | 16p13.3       | 1.9 |
| 55959_at   | AA148929                                                                             |                |               | 1.8 |
| 32645_at   | phosphodiesterase 4D interacting protein (myomegalin)                                | <i>PDE4DIP</i> | 1q12          | 1.8 |
| 50409_at   | oxysterol binding protein-like 8                                                     | <i>OSBPL8</i>  | 12q21.1       | 1.8 |
| 57071_at   | AA827641                                                                             |                |               | 1.8 |
| 55166_at   | AA593942                                                                             |                |               | 1.8 |
| 31600_s_at | postmeiotic segregation increased 2-like 1                                           | <i>PMS2L1</i>  | 7q11-q22      | 1.8 |
| 38418_at   | cyclin D1 (PRAD1: parathyroid adenomatosis 1)                                        | <i>CCND1</i>   | 11q13         | 1.8 |
| 32612_at   | gelsolin (amyloidosis, Finnish type)                                                 | <i>GSN</i>     | 9q33          | 1.8 |
| 42564_at   | W84667                                                                               |                |               | 1.8 |
| 46189_at   | AI689215                                                                             |                | Xq22.2        | 1.8 |
| 39382_at   | tripartite motif-containing 2                                                        | <i>TRIM2</i>   | 4q31.23       | 1.8 |
| 48658_at   | H77361                                                                               |                |               | 1.8 |
| 35628_at   | transmembrane 7 superfamily member 2                                                 | <i>TM7SF2</i>  | 11q13         | 1.8 |
| 43273_at   | AI655806                                                                             |                |               | 1.8 |

|            |                                                                                                                         |                 |                |     |
|------------|-------------------------------------------------------------------------------------------------------------------------|-----------------|----------------|-----|
| 55629_at   | AL040635                                                                                                                | <i>KIAA1710</i> | 1p36           | 1.7 |
| 37914_at   | endosome-associated FYVE-domain protein                                                                                 | <i>ENDOFIN</i>  | 5p15.2-q14.3   | 1.7 |
| 32679_at   | D13634                                                                                                                  | <i>KIAA0009</i> | 8q12.1         | 1.7 |
| 36475_at   | glycine C-acetyltransferase (2-amino-3-ketobutyrate - coenzyme-A ligase)                                                | <i>GCAT</i>     | 22q13.1        | 1.7 |
| 41718_g_at | fatty acid desaturase 1                                                                                                 | <i>FADS1</i>    | 11q12.2-q13.1  | 1.7 |
| 56595_at   | AA192755                                                                                                                |                 |                | 1.7 |
| 35917_at   | microtubule-associated protein 1A                                                                                       | <i>MAP1A</i>    | 15q13-qter     | 1.7 |
| 55280_at   | putative N6-DNA-methyltransferase                                                                                       | <i>N6AMT1</i>   | 21q21.2        | 1.7 |
| 35411_at   | chromosome 16 open reading frame 7                                                                                      | <i>C16orf7</i>  | 16q24          | 1.7 |
| 33294_at   | D29958                                                                                                                  |                 | 3p21.32-p21.31 | 1.7 |
| 45284_at   | butyrate-induced transcript 1                                                                                           | <i>HSPC121</i>  | 15q22.2        | 1.7 |
| 59729_at   | AI792979                                                                                                                |                 |                | 1.7 |
| 32913_i_at | AC005175                                                                                                                | □               | □              | 1.7 |
| 46208_at   | AI031666                                                                                                                |                 |                | 1.7 |
| 46684_at   | cardiomyopathy associated 3                                                                                             | <i>CMYA3</i>    | 2              | 1.7 |
| 35984_at   | E2F transcription factor 6                                                                                              | <i>E2F6</i>     | 22q11          | 1.7 |
| 42025_i_at | AI821532                                                                                                                |                 |                | 1.7 |
| 46250_at   | AI924542                                                                                                                |                 | 2p16.2         | 1.6 |
| 1813_at    | HG363-HT363                                                                                                             |                 |                | 1.6 |
| 46309_at   | AL039239                                                                                                                |                 | 3p25.1         | 1.6 |
| 43599_at   | T62955                                                                                                                  |                 |                | 1.6 |
| 37584_at   | Fanconi anemia, complementation group G                                                                                 | <i>FANCG</i>    | 9p13           | 1.6 |
| 48550_at   | T62854                                                                                                                  |                 | 12p13.31       | 1.6 |
| 47460_at   | N64794                                                                                                                  |                 | 10q24          | 1.6 |
| 57192_at   | tumor suppressing subtransferable candidate 1                                                                           | <i>TSSC1</i>    | 2              | 1.6 |
| 46735_s_at | AI952097                                                                                                                |                 | 1p34.1         | 1.6 |
| 46636_at   | AA099259                                                                                                                |                 |                | 1.6 |
| 56416_at   | AA131252                                                                                                                |                 |                | 1.6 |
| 38812_at   | laminin, beta 2 (laminin S)                                                                                             | <i>LAMB2</i>    | 3p21           | 1.6 |
| 46999_at   | oxidoreductase UCPA                                                                                                     | <i>LOC56898</i> | 4q22.2         | 1.6 |
| 47840_at   | R42863                                                                                                                  |                 |                | 1.5 |
| 34340_at   | cytochrome b5 outer mitochondrial membrane precursor                                                                    | <i>CYB5-M</i>   | 16q22.1        | 1.5 |
| 33412_at   | lectin, galactoside-binding, soluble, 1 (galectin 1)                                                                    | <i>LGALS1</i>   | 22q13.1        | 1.5 |
| 51980_at   | AI918081                                                                                                                |                 |                | 1.5 |
| 50346_at   | Golgi autoantigen, golgin subfamily a, 5                                                                                | <i>GOLGA5</i>   | 14q            | 1.5 |
| 48893_at   | AI452715                                                                                                                |                 |                | 1.5 |
| 53106_at   | mitochondrial ribosomal protein S28                                                                                     | <i>MRPS28</i>   | 8q21.1-q21.2   | 1.5 |
| 38417_at   | adenosine monophosphate deaminase 2 (isoform L)                                                                         | <i>AMPD2</i>    | 1p13.3         | 1.5 |
| 33447_at   | myosin, light polypeptide, regulatory, non-sarcomeric (20 kDa)                                                          | <i>MLCB</i>     | 18p11.31       | 1.5 |
| 45884_at   | solute carrier family 22 (organic anion transporter), member 8                                                          | <i>SLC22A8</i>  | 11q11          | 1.5 |
| 56360_at   | divalent cation tolerant protein CUTA                                                                                   | <i>LOC51596</i> | 6pter-p21.31   | 1.5 |
| 51018_at   | AA707221                                                                                                                |                 |                | 1.5 |
| 57786_at   | fragile X mental retardation, autosomal homolog 1                                                                       | <i>FXR1</i>     | 3q28           | 1.5 |
| 32681_at   | solute carrier family 9 (sodium/hydrogen exchanger), isoform 1 (antiporter, Na <sup>+</sup> /H <sup>+</sup> , amiloride | <i>SLC9A1</i>   | 1p36.1-p35     | 1.5 |

|          |                                                          |                |                 |     |
|----------|----------------------------------------------------------|----------------|-----------------|-----|
| 49485_at | PR domain containing 4                                   | <i>PRDM4</i>   | 12q23-q24.1     | 1.5 |
| 41760_at | cytochrome c oxidase subunit VIIa polypeptide 2 (liver)  | <i>COX7A2</i>  | 6q12            | 1.5 |
| 57222_at | AA203532                                                 | <i>MGC4730</i> | 9p23            | 1.5 |
| 34338_at | cytoskeleton-associated protein 1                        | <i>CKAP1</i>   | 19q13.11-q13.12 | 1.4 |
| 48831_at | cytokine induced protein 29 kDa                          | <i>CIP29</i>   | 12q12           | 1.4 |
| 55383_at | AA454036                                                 |                |                 | 1.4 |
| 41756_at | XPA binding protein 1; putative ATP(GTP)-binding protein | <i>NTPBP</i>   | 2p23.3          | 1.4 |
| 52422_at | heart alpha-kinase                                       | <i>HAK</i>     | 18q21.2         | 1.4 |
| 46712_at | W63773                                                   |                | 12p13.32        | 1.4 |
| 40147_at | vesicle amine transport protein 1                        | <i>VATI</i>    | 17q21           | 1.4 |
