# Supplementary material
Source: PubMed Central journal article supplement (PMC153613)
Supplement: pnas_0330960100_4.pdf [file pnas_0330960100_4.pdf]

**Table 3. Functional grouping of 123 U95Av2 and 83 U95B probe sets with  $P < 0.001$  and fold changes exceeding selected threshold (i.e., "reliably changed"). "Fold" refers to changes between NM and normal. The " $P$  value" is the outcome of  $t$ -test analysis.**

| Affy no.                   | Gene name                                                                      | Symbol          | Location      | Fold  | $P$ value |
|----------------------------|--------------------------------------------------------------------------------|-----------------|---------------|-------|-----------|
| <b>Glucose metabolism</b>  |                                                                                |                 |               |       |           |
| 33980_at                   | 6-phosphofructo-2-kinase/fructose-2,6-bisphosphatase 1                         | <i>PFKFB1</i>   | Xp11.21       | -4.2  | 0.000156  |
| 40293_at                   | fructose-1,6-bisphosphatase 2                                                  | <i>FBP2</i>     | 1p36.2-p36.1  | -2.8  | 0.000277  |
| 32800_at                   | retinoid X receptor, alpha                                                     | <i>RXRA</i>     | 9q34.3        | -2.7  | 0.000061  |
| 32210_at                   | phosphoglucomutase 1                                                           | <i>PGM1</i>     | 1p31          | -2.5  | 0.000358  |
| 36196_at                   | phosphofructokinase, muscle                                                    | <i>PFKM</i>     | 12q13.3       | -1.9  | 0.000021  |
| 32260_at                   | phosphoprotein enriched in astrocytes 15                                       | <i>PEA15</i>    | 1q21.1        | 1.7   | 0.000168  |
| 33819_at                   | lactate dehydrogenase B                                                        | <i>LDHB</i>     | 12p12.2-p12.1 | 2.6   | 0.000213  |
| <b>Glycogen metabolism</b> |                                                                                |                 |               |       |           |
| 39291_at                   | phosphorylase kinase, alpha 1 (muscle)                                         | <i>PHKA1</i>    | Xq12-q13      | -3.0  | 0.000033  |
| 33229_at                   | ribosomal protein S6 kinase, 90 kDa, polypeptide 3                             | <i>RPS6KA3</i>  | Xp22.2-p22.1  | -2.4  | 0.000005  |
| 812_at                     | protein phosphatase 1, regulatory (inhibitor) subunit 2                        | <i>PPP1R2</i>   | 3q29          | -2.2  | 0.000111  |
| 33180_at                   | protein phosphatase 1, regulatory (inhibitor) subunit 2                        | <i>PPP1R2</i>   | 3q29          | -2.0  | 0.000025  |
| 37392_at                   | phosphorylase kinase, beta                                                     | <i>PHKB</i>     | 16q12-q13     | -1.9  | 0.000002  |
| <b>Fatty acid related</b>  |                                                                                |                 |               |       |           |
| 34420_at                   | uncoupling protein 3 (mitochondrial, proton carrier)                           | <i>UCP3</i>     | 11q13.1       | -12.6 | 0.000294  |
| 34421_g_at                 | uncoupling protein 3 (mitochondrial, proton carrier)                           | <i>UCP3</i>     | 11q13         | -8.1  | 0.000007  |
| 34422_r_at                 | uncoupling protein 3 (mitochondrial, proton carrier)                           | <i>UCP3S</i>    |               | -5.1  | 0.000064  |
| 38098_at                   | lipin 1                                                                        | <i>LPIN1</i>    | 2p21          | -3.7  | 0.000007  |
| 32800_at                   | retinoid X receptor, alpha                                                     | <i>RXRA</i>     | 9q34.3        | -2.7  | 0.000061  |
| 37152_at                   | peroxisome proliferative activated receptor, delta                             | <i>PPARD</i>    | 6p21.2-p21.1  | -2.4  | 0.000698  |
| 32724_at                   | phytanoyl-CoA hydroxylase (Refsum disease)                                     | <i>PHYH</i>     | 10pter-p11.2  | -1.8  | 0.000002  |
| 32569_at                   | platelet-activating factor acetylhydrolase, isoform Ib, alpha subunit (45 kDa) | <i>PAFAH1B1</i> | 17p13.3       | -1.6  | 0.000976  |
| 41720_r_at                 | fatty acid desaturase 1                                                        | <i>FADS1</i>    | 11q12.2-q13.1 | 2.5   | 0.000286  |
| 501_g_at                   | cytochrome P450, subfamily III (arachidonic acid epoxygenase) polypeptide 2    | <i>CYP2J2</i>   | -             | 3.4   | 0.000101  |
| 500_at                     | cytochrome P450, subfamily III (arachidonic acid epoxygenase) polypeptide 2    | <i>CYP2J2</i>   | -             | 7.4   | 0.000002  |
| <b>Cell cycle</b>          |                                                                                |                 |               |       |           |
| 47603_at                   | glioma tumor suppressor candidate region gene 1                                | <i>GLTSCR1</i>  | 19q13.3       | -4.5  | 0.000291  |
| 45319_at                   | mitogen-activated protein kinase 9                                             | <i>MAPK9</i>    | 5q35          | -2.7  | 0.000003  |
| 40091_at                   | B-cell CLL/lymphoma 6 (zinc finger protein 51)                                 | <i>BCL6</i>     | 3q27          | -2.4  | 0.000407  |

|                      |                                                                                         |                 |              |      |          |
|----------------------|-----------------------------------------------------------------------------------------|-----------------|--------------|------|----------|
| 33229_at             | ribosomal protein S6 kinase, 90 kDa, polypeptide 3                                      | <i>RPS6KA3</i>  | Xp22.2-p22.1 | -2.4 | 0.000005 |
| 34800_at             | DNA ligase I                                                                            | <i>LIG1</i>     | -            | -2.1 | 0.000350 |
| 39431_at             | aminopeptidase puromycin sensitive                                                      | <i>NPEPPS</i>   | 17q21        | -2.0 | 0.000004 |
| 32597_at             | retinoblastoma-like 2 (p130)                                                            | <i>RBL2</i>     | 16q12.2      | -1.9 | 0.000103 |
| 1917_at              | v-raf-1 murine leukemia viral oncogene homolog 1                                        | <i>RAF1</i>     | 3p25         | -1.8 | 0.000565 |
| 41225_at             | dual specificity phosphatase 3 (vaccinia virus phosphatase VH1-cullin 1)                | <i>DUSP3</i>    | 17q21        | -1.8 | 0.000330 |
| 39724_s_at           | protein phosphatase 6, catalytic subunit                                                | <i>CUL1</i>     | 7q36.1       | -1.7 | 0.000011 |
| 37581_at             | ras-related C3 botulinum toxin substrate 1 (rho family, small GTP binding protein Rac1) | <i>PPP6C</i>    | 9q34.11      | -1.6 | 0.000391 |
| 40864_at             | ornithine decarboxylase antizyme 2                                                      | <i>RAC1</i>     | 7p22         | -1.6 | 0.000992 |
| 36146_at             | bromodomain-containing 4                                                                | <i>OAZ2</i>     | 15q22.1      | -1.6 | 0.000160 |
| 39094_at             | platelet-activating factor acetylhydrolase, isoform Ib, alpha subunit (45 kDa)          | <i>BRD4</i>     | 19p13.1      | -1.6 | 0.000081 |
| 32569_at             | cyclin-dependent kinase 4                                                               | <i>PFAFH1B1</i> | 17p13.3      | -1.6 | 0.000976 |
| 1942_s_at            | heat shock 27-kDa protein 2                                                             | <i>CDK4</i>     | 12q14        | 1.6  | 0.000003 |
| 541_g_at             | phosphoprotein enriched in astrocytes 15                                                | <i>HSPB2</i>    | 11q22-q23    | 1.7  | 0.000076 |
| 32260_at             | fibroblast growth factor (acidic) intracellular binding protein                         | <i>PEA15</i>    | 1q21.1       | 1.7  | 0.000168 |
| 37361_at             | heat shock 27-kDa protein 2                                                             | <i>FIBP</i>     | 11q13.1      | 1.8  | 0.000059 |
| 540_at               | docking protein 1, 62-kDa (downstream of tyrosine kinase 1)                             | <i>HSPB2</i>    | 11q22-q23    | 1.8  | 0.000425 |
| 816_g_at             | p53-regulated DDA3                                                                      | <i>DOK1</i>     | 2p13         | 2.0  | 0.000127 |
| 37347_at             | transforming growth factor, beta 2                                                      | <i>DDA3</i>     | 1p13.1       | 2.3  | 0.000015 |
| 1262_s_at            |                                                                                         | <i>TGFB2</i>    | 1q41         | 9.2  | 0.000528 |
| <b>Transcription</b> |                                                                                         |                 |              |      |          |
| 40823_s_at           | nuclear factor of activated T-cells, cytoplasmic, calcineurin-dependent 3               | <i>NFATC3</i>   | 16q13-q24    | -4.6 | 0.000006 |
| 50287_at             | NS1-binding protein                                                                     | <i>NS1-BP</i>   | 1q25.1-q31.1 | -4.2 | 0.000562 |
| 32078_at             | neural precursor cell expressed, developmentally down-regulated 4                       | <i>NEDD4</i>    | 15q          | -4.2 | 0.000114 |
| 32800_at             | retinoid X receptor, alpha                                                              | <i>RXRA</i>     | 9q34.3       | -2.7 | 0.000061 |
| 44538_at             | nuclear receptor subfamily 2, group C, member 2                                         | <i>NR2C2</i>    | 3p25         | -2.5 | 0.000358 |
| 40091_at             | B-cell CLL/lymphoma 6 (zinc finger protein 51)                                          | <i>BCL6</i>     | 3q27         | -2.4 | 0.000407 |
| 37152_at             | peroxisome proliferative activated receptor, delta                                      | <i>PPARD</i>    | 6p21.2-p21.1 | -2.4 | 0.000698 |
| 50262_at             | nuclear factor I/C (CCAAT-binding transcription factor)                                 | <i>NFIC</i>     | 19p13.3      | -2.3 | 0.000384 |
| 350_at               | zinc finger protein 161                                                                 | <i>ZNF161</i>   | 17q23.2      | -2.1 | 0.000005 |
| 47570_at             | RAN binding protein 7                                                                   | <i>RANBP7</i>   | 11p15.3      | -2.0 | 0.000135 |
| 40822_at             | nuclear factor of activated T-cells, cytoplasmic, calcineurin-dependent 3               | <i>NFATC3</i>   | 16q13-q24    | -2.0 | 0.000507 |
| 32628_at             | zinc finger protein 161                                                                 | <i>ZNF161</i>   | 17q23.2      | -2.0 | 0.000085 |
| 38228_g_at           | microphthalmia-associated transcription factor                                          | <i>MITF</i>     | 3p14.1-p12.3 | -1.9 | 0.000050 |
| 42054_at             | signal transducer and activator of transcription 2                                      | <i>STAT2</i>    | 12q12        | -1.9 | 0.000223 |
| 35824_at             | zinc finger protein 238                                                                 | <i>ZNF238</i>   | 1q44-qter    | -1.9 | 0.000010 |
| 38944_at             | MAD, mothers against decapentaplegic homolog 3                                          | <i>MADH3</i>    | 15q21-q22    | -1.9 | 0.000866 |

|                          |                                                                                |                 |                 |      |          |
|--------------------------|--------------------------------------------------------------------------------|-----------------|-----------------|------|----------|
| 40182_s_at               | coactivator-associated arginine methyltransferase-1                            | <i>CARM1</i>    | 19p13.2         | -1.9 | 0.000103 |
| 250_at                   | nuclear factor of activated T-cells, cytoplasmic, calcineurin-dependent 3      | <i>NFATC3</i>   | 16q13-q24       | -1.7 | 0.000390 |
| 50228_at                 | MAX protein                                                                    | <i>MAX</i>      | 14q23           | -1.7 | 0.000622 |
| 35258_f_at               | splicing factor, arginine/serine-rich 2, interacting protein                   | <i>SFRS2IP</i>  | 14q13           | -1.6 | 0.000683 |
| 53820_at                 | phosphatidylinositol glycan, class S                                           | <i>PIGS</i>     | 17p13.2         | 1.5  | 0.000455 |
| 32559_s_at               | U6 snRNA-associated Sm-like protein                                            | <i>LSM4</i>     | 19p13.12        | 1.6  | 0.000014 |
| 46212_at                 | RNA binding protein (autoantigenic, hnRNP-associated with lethal yellow)       | <i>RALY</i>     | 20q11.21-q11.23 | 1.7  | 0.000068 |
| 34707_at                 | chromodomain helicase DNA binding protein 3                                    | <i>CHD3</i>     | 17p13.1         | 1.9  | 0.000573 |
| 39747_at                 | polymerase (RNA) II (DNA directed) polypeptide G                               | <i>POLR2G</i>   | 11q13.1         | 2.0  | 0.000000 |
| 41619_at                 | interferon regulatory factor 6                                                 | <i>IRF6</i>     | 1q32.3-q41      | 2.0  | 0.000197 |
| 53569_at                 | FUS interacting protein 1                                                      | <i>FUSIP1</i>   | 1p36.11         | 2.2  | 0.000775 |
| <b>Ubiquitin related</b> |                                                                                |                 |                 |      |          |
| 1164_at                  | ubiquitin-conjugating enzyme E2D 1 (UBC4/5 homolog, yeast)                     | <i>UBE2D1</i>   | 10q11.2-q21     | -2.9 | 0.000066 |
| 37826_at                 | ubiquitin-conjugating enzyme E2D 1 (UBC4/5 homolog, yeast)                     | <i>UBE2D1</i>   | 10q11.2-q21     | -2.6 | 0.000005 |
| 36579_at                 | ubiquitination factor E4A (UFD2 homolog, yeast)                                | <i>UBE4A</i>    | 11q23.3         | -2.4 | 0.000076 |
| 35847_at                 | ubiquitin specific protease 24                                                 | <i>USP24</i>    | 1p32.1          | -2.4 | 0.000427 |
| 36982_at                 | ubiquitin specific protease 14 (tRNA-guanine transglycosylase)                 | <i>USP14</i>    | 18p11.32        | -1.7 | 0.000164 |
| 54822_at                 | ubiquitin specific protease 25                                                 | <i>USP25</i>    | 21q11.2         | -1.7 | 0.000016 |
| 40619_at                 | ubiquitin carrier protein                                                      | <i>E2-EPF</i>   | 17p12-p11       | 2.2  | 0.000251 |
| <b>Muscle and nerve</b>  |                                                                                |                 |                 |      |          |
| 41769_at                 | ATPase, Ca <sup>2+</sup> transporting, cardiac muscle, fast twitch 1           | <i>ATP2A1</i>   | 16p12.1         | -4.1 | 0.000002 |
| 38516_at                 | sodium channel, voltage-gated, type I, beta polypeptide                        | <i>SCN1B</i>    | 19q13.1         | -2.5 | 0.000003 |
| 36496_at                 | inositol(myo)-1(or 4)-monophosphatase 2                                        | <i>IMPA2</i>    | 18p11.2         | -2.5 | 0.000005 |
| 37765_at                 | leiomodulin 1 (smooth muscle)                                                  | <i>LMOD1</i>    | 1q32            | -2.4 | 0.000261 |
| 40522_at                 | glutamate-ammonia ligase (glutamine synthase)                                  | <i>GLUL</i>     | 1q31            | -2.3 | 0.000456 |
| 53162_at                 | four and a half LIM domains 3                                                  | <i>FHL3</i>     | 1p34            | -2.1 | 0.000038 |
| 39431_at                 | aminopeptidase puromycin sensitive                                             | <i>NPEPPS</i>   | 17q21           | -2.0 | 0.000004 |
| 37670_at                 | annexin A7                                                                     | <i>ANXA7</i>    | 10q21.1-q21.2   | -2.0 | 0.000139 |
| 35824_at                 | zinc finger protein 238                                                        | <i>ZNF238</i>   | 1q44-qter       | -1.9 | 0.000010 |
| 41815_at                 | synaptic nuclei expressed gene 2                                               | <i>SYNE-2</i>   | 14q23.2         | -1.9 | 0.000038 |
| 32569_at                 | platelet-activating factor acetylhydrolase, isoform Ib, alpha subunit (45 kDa) | <i>PAFAH1B1</i> | 17p13.3         | -1.6 | 0.000976 |
| 37996_s_at               | dystrophia myotonica-protein kinase                                            | <i>DMPK</i>     | 19q13.3         | 1.8  | 0.000988 |
| 40862_i_at               | creatine kinase, brain                                                         | <i>CKB</i>      | 14q32           | 1.9  | 0.000027 |
| 36493_at                 | lymphocyte-specific protein 1                                                  | <i>LSP1</i>     | 11p15.5         | 2.5  | 0.000810 |
| 36505_at                 | calsequestrin 2 (cardiac muscle)                                               | <i>CASQ2</i>    | 1p13.3-p11      | 2.8  | 0.000010 |
| 41289_at                 | neural cell adhesion molecule 1                                                | <i>NCAM1</i>    | 11q23.1         | 3.0  | 0.000005 |
| 31810_g_at               | contactin 1                                                                    | <i>CNTN1</i>    | 12q11-q12       | 3.3  | 0.000415 |
| 38251_at                 | myosin, light polypeptide 1, alkali; skeletal, fast                            | <i>MYL1</i>     | 2q33-q34        | 3.7  | 0.000305 |

|              |                                                                                                                                                   |                         |               |       |          |
|--------------|---------------------------------------------------------------------------------------------------------------------------------------------------|-------------------------|---------------|-------|----------|
| 32838_at     | similar to human nonmuscle myosin heavy chain-B (MYH10)                                                                                           | <i>similar to MYH10</i> | -             | 3.7   | 0.000004 |
| 37743_at     | fasciculation and elongation protein zeta 1 (zygin I)                                                                                             | <i>FEZ1</i>             | 11q24.2       | 5.6   | 0.000787 |
| <b>Other</b> |                                                                                                                                                   |                         |               |       |          |
| 38469_at     | transmembrane 4 superfamily member 3                                                                                                              | <i>TM4SF3</i>           | 12q14.1-q21.1 | -11.6 | 0.000478 |
| 50742_at     | KH domain containing, RNA binding, signal transduction associated 3                                                                               | <i>KHDRBS3</i>          | 8q24.2        | -9.6  | 0.000039 |
| 35134_at     | ADP-ribosyltransferase 3                                                                                                                          | <i>ART3</i>             | 4p15.1-p14    | -4.3  | 0.000008 |
| 39695_at     | decay accelerating factor for complement (CD55, Cromer blood group system)                                                                        | <i>DAF</i>              | 1q32          | -3.6  | 0.000179 |
| 50763_at     | Golgi associated, gamma adaptin ear containing, ARF binding protein 2                                                                             | <i>GGA2</i>             | 16p12         | -3.6  | 0.000126 |
| 38316_at     | formyltetrahydrofolate dehydrogenase                                                                                                              | <i>FTHFD</i>            | 3q21.3        | -3.2  | 0.000001 |
| 41744_at     | optineurin                                                                                                                                        | <i>OPTN</i>             | 10            | -3.2  | 0.000027 |
| 41766_at     | mannosidase, alpha, class 2A, member 2                                                                                                            | <i>MAN2A2</i>           | 15q25         | -3.1  | 0.000133 |
| 37283_at     | meningioma (disrupted in balanced translocation) 1                                                                                                | <i>MNI</i>              | 22q12.1       | -2.7  | 0.000063 |
| 41742_s_at   | optineurin                                                                                                                                        | <i>OPTN</i>             | 10            | -2.5  | 0.000269 |
| 38188_s_at   | mannosidase, alpha, class 2A, member 2                                                                                                            | <i>MAN2A2</i>           | 15q25         | -2.4  | 0.000006 |
| 46399_at     | sirtuin (silent mating type information regulation 2, <i>S. cerevisiae</i> , homolog) 1                                                           | <i>SIRT1</i>            | 10q22.2       | -2.3  | 0.000128 |
| 48847_at     | casein kinase 1, gamma 2                                                                                                                          | <i>CSNK1G2</i>          | 19p13.3       | -2.3  | 0.000241 |
| 33800_at     | adenylate cyclase 9                                                                                                                               | <i>ADCY9</i>            | 16p13.3       | -2.0  | 0.000009 |
| 607_s_at     | von Willebrand factor                                                                                                                             | <i>VWF</i>              | 12p13.3       | -2.0  | 0.000021 |
| 41197_at     | RAD23 homolog A ( <i>S. cerevisiae</i> )                                                                                                          | <i>RAD23A</i>           | 19p13.2       | -1.9  | 0.000013 |
| 674_g_at     | methylenetetrahydrofolate dehydrogenase (NADP <sup>+</sup> dependent), methenyltetrahydrofolate cyclohydrolase, formyltetrahydrofolate synthetase | <i>MTHFD1</i>           | 14q24         | -1.9  | 0.000017 |
| 53149_at     | integral inner nuclear membrane protein                                                                                                           | <i>MAN1</i>             | 12q14         | -1.8  | 0.000120 |
| 39691_at     | SH3-domain GRB2-like endophilin B1                                                                                                                | <i>SH3GLB1</i>          | 1p22          | -1.7  | 0.000312 |
| 36613_at     | interferon-related developmental regulator 2                                                                                                      | <i>IFRD2</i>            | 3p21.3        | -1.6  | 0.000287 |
| 33346_r_at   | tubulin, gamma 1                                                                                                                                  | <i>TUBG1</i>            | 17q21         | -1.6  | 0.000830 |
| 33708_at     | prostate cancer overexpressed gene 1                                                                                                              | <i>POVI</i>             | 11p11.2-p11.1 | -1.5  | 0.000236 |
| 1014_at      | polymerase (DNA directed), gamma                                                                                                                  | <i>POLG</i>             | 15q25         | -1.4  | 0.000051 |
| 37325_at     | angiopoietin 1                                                                                                                                    | <i>ANGPT1</i>           | 8q22.3-q23    | 1.5   | 0.000613 |
| 709_at       | tubulin, beta polypeptide                                                                                                                         | <i>TUBB</i>             | 6p21.3        | 1.7   | 0.000419 |
| 33637_g_at   | cancer/testis antigen 1                                                                                                                           | <i>CTAG1</i>            | Xq28          | 1.8   | 0.000683 |
| 39332_at     | tubulin, beta polypeptide                                                                                                                         | <i>TUBB</i>             | 6p21.3        | 2.2   | 0.000499 |
| 40567_at     | tubulin, alpha 3                                                                                                                                  | <i>TUBA3</i>            | 12q12-q14.3   | 2.2   | 0.000459 |
| 45543_r_at   | translocase of outer mitochondrial membrane 22 homolog                                                                                            | <i>TOMM22</i>           | 22q12-q13     | 2.3   | 0.000212 |
| 48822_s_at   | adenylate kinase 3                                                                                                                                | <i>AK3</i>              | 9pter-p13     | 2.4   | 0.000284 |
| 49961_at     | phosphodiesterase 4D interacting protein (myomegalin)                                                                                             | <i>PDE4DIP</i>          | 1q12          | 2.8   | 0.000001 |
| 38087_s_at   | S100 calcium binding protein A4 (calcium protein, calvasculin, metastasin, murine placental homolog)                                              | <i>S100A4</i>           | 1q21          | 3.2   | 0.000657 |
| 39979_at     | coagulation factor X                                                                                                                              | <i>F10</i>              | 13q34         | 4.1   | 0.000217 |

|                |                                                          |               |              |       |          |
|----------------|----------------------------------------------------------|---------------|--------------|-------|----------|
| 1495_at        | latent transforming growth factor beta binding protein 1 | <i>LTBP1</i>  | 2p22-p21     | 5.8   | 0.000003 |
| <b>Unknown</b> |                                                          |               |              |       |          |
| 57590_at       | AL044181                                                 | -             | -            | -13.8 | 0.000016 |
| 42710_at       | AI732608                                                 | -             | -            | -10.3 | 0.000227 |
| 46671_at       | AL048961                                                 | -             | -            | -6.9  | 0.000000 |
| 57226_at       | AI932981                                                 | FLJ22174      | 6p24.3       | -4.3  | 0.000001 |
| 58057_r_at     | AA009593                                                 | -             | -            | -4.1  | 0.000808 |
| 52701_at       | AA436311                                                 | -             | -            | -3.8  | 0.000228 |
| 53933_at       | Ku70-binding protein 3                                   | <i>KUB3</i>   | 12q13.11     | -3.7  | 0.000460 |
| 44112_at       | AA224245                                                 | -             | -            | -3.7  | 0.000193 |
| 50248_at       | W31096                                                   | -             | -            | -3.5  | 0.000175 |
| 47638_at       | AI700701                                                 | FLJ23058      | 17q25.3      | -3.5  | 0.000029 |
| 51756_at       | AA989233                                                 | -             | -            | -3.4  | 0.000071 |
| 42979_at       | AI669957                                                 | -             | -            | -3.2  | 0.000223 |
| 38864_at       | W26851                                                   | -             | 7q33         | -3.1  | 0.000011 |
| 54028_at       | AL048962                                                 | -             | -            | -3.0  | 0.000011 |
| 45203_at       | AI990483                                                 | FLJ12650      | 1p34.3       | -2.9  | 0.000905 |
| 32130_at       | W25984                                                   | TCBAP0758     | 19q13.3      | -2.9  | 0.000113 |
| 37230_at       | AB007938                                                 | KIAA0469      | 1p36.23      | -2.8  | 0.000111 |
| 51155_at       | AL043669                                                 | -             | -            | -2.7  | 0.000725 |
| 42582_at       | N22508                                                   | -             | -            | -2.7  | 0.000906 |
| 43524_at       | C14031                                                   | KIAA1170      | 7q31.1       | -2.5  | 0.000004 |
| 48287_at       | AA233912                                                 | -             | -            | -2.5  | 0.000007 |
| 42711_g_at     | AI732608                                                 | -             | -            | -2.5  | 0.000114 |
| 50221_at       | AI524138                                                 | -             | -            | -2.5  | 0.000010 |
| 48508_at       | AA461609                                                 | DKFZp547N024  | -            | -2.4  | 0.000135 |
| 55989_at       | AI018820                                                 | -             | -            | -2.4  | 0.000001 |
| 44600_at       | AI745248                                                 | KIAA1917      | 17q25.3      | -2.3  | 0.000000 |
| 53198_at       | N21424                                                   | DKFZp586C0224 | -            | -2.2  | 0.000014 |
| 57547_at       | AI361002                                                 | FLJ12168      | 19q13.33     | -2.2  | 0.000037 |
| 53830_at       | AI870761                                                 | DKFZp547O146  | 19p13.3      | -2.2  | 0.000352 |
| 34194_at       | AL049313                                                 | DKFZp564B076  | -            | -2.2  | 0.000092 |
| 34672_at       | AB011175                                                 | KIAA0603      | 13q21.33     | -2.1  | 0.000123 |
| 38626_at       | AB007859                                                 | KIAA0399      | 17p13.3      | -2.1  | 0.000056 |
| 48063_at       | AA173572                                                 | -             | -            | -2.1  | 0.000652 |
| 54848_at       | AI823400                                                 | -             | -            | -2.0  | 0.000641 |
| 32253_at       | arginine-glutamic acid dipeptide (RE) repeats            | RERE          | 1p36.1-p36.2 | -2.0  | 0.000091 |
| 57916_s_at     | AA778430                                                 | -             | -            | -2.0  | 0.000130 |
| 46699_at       | AI052110                                                 | -             | -            | -2.0  | 0.000583 |
| 31936_s_at     | limkain b 1                                              | LKAP          | 16p13.13     | -1.9  | 0.000563 |
| 56274_at       | raptor                                                   | raptor        | 17q25.3      | -1.9  | 0.000061 |
| 52145_at       | AI620923                                                 | FLJ20739      | 17q23.3      | -1.9  | 0.000000 |
| 52911_at       | AA703945                                                 | DKFZP564G092  | 10q22.2      | -1.9  | 0.000324 |
| 50751_at       | AA181800                                                 | -             | -            | -1.8  | 0.000176 |
| 32593_at       | D42043                                                   | KIAA0084      | 3p24.3       | -1.8  | 0.000566 |
| 43960_at       | AA630975                                                 | FLJ10782      | 1p36.32      | -1.8  | 0.000001 |
| 47825_at       | AA781880                                                 | -             | -            | -1.7  | 0.000043 |
| 38070_at       | AL080234                                                 | DKFZp586L081  | -            | -1.7  | 0.000437 |
| 32914_f_at     | AC005175                                                 | -             | 19p13.3      | -1.6  | 0.000410 |
| 34785_at       | AB028948                                                 | KIAA1025      | 12q24.22     | -1.6  | 0.000333 |
| 51036_at       | AA187892                                                 | KIAA1214      | 4q31.1       | -1.6  | 0.000431 |
| 38778_at       | AB028969                                                 | KIAA1046      | 4q31.1       | -1.6  | 0.000330 |

|            |                               |               |               |      |          |
|------------|-------------------------------|---------------|---------------|------|----------|
| 56970_s_at | AA442392                      | -             | -             | 1.5  | 0.000073 |
| 57125_at   | W74502                        | MGC11257      | 7p22.3        | 1.5  | 0.000738 |
| 54781_at   | T77242                        | -             | -             | 1.6  | 0.000285 |
| 44658_at   | AI817320                      | MGC13010      | 8q24.3        | 1.7  | 0.000311 |
| 41273_at   | AL046940                      | DKFZp586I0517 | -             | 1.7  | 0.000693 |
| 45286_at   | N48241                        | -             | -             | 1.8  | 0.000001 |
| 52653_at   | AI360291                      | -             | -             | 1.9  | 0.000451 |
| 59567_at   | AA456099                      | -             | -             | 1.9  | 0.000536 |
| 36529_at   | AI885381                      | MGC2650       | 19q13.32      | 2.0  | 0.000688 |
| 48091_at   | AA502943                      | -             | -             | 2.1  | 0.000647 |
| 46195_at   | AA419539                      | FLJ11753      | 2q22.1        | 2.3  | 0.000053 |
| 57194_at   | T57670                        | -             | -             | 2.3  | 0.000054 |
| 55894_at   | AI670824                      | -             | -             | 2.4  | 0.000348 |
| 38440_s_at | AA015605                      | FLJ20811      | Xq21.33-q22.3 | 2.4  | 0.000764 |
| 44804_s_at | AI982913                      | FLJ21313      | 5q23.2        | 2.4  | 0.000342 |
| 34860_g_at | melanoma antigen, family D, 2 | MAGED2        | Xp11.4-p11.1  | 2.5  | 0.000350 |
| 50417_at   | AA641023                      | FLJ13154      | 16q13         | 2.5  | 0.000484 |
| 48892_at   | AA166703                      | DKFZP564B1162 | 4q21.23-q21.3 | 2.6  | 0.000892 |
| 45823_at   | W72771                        | -             | -             | 2.8  | 0.000901 |
| 46410_at   | N21460                        | -             | Xq22.1-q22.3  | 2.9  | 0.000045 |
| 43827_s_at | T03298                        | -             | -             | 2.9  | 0.000034 |
| 44603_at   | AA029506                      | -             | -             | 3.2  | 0.000682 |
| 45773_at   | N36468                        | -             | -             | 3.2  | 0.000687 |
| 47883_at   | AA029449                      | -             | -             | 3.5  | 0.000911 |
| 41378_at   | AF010236                      | -             | 5q31-33       | 3.6  | 0.000419 |
| 45786_at   | AA082546                      | -             | -             | 3.8  | 0.000567 |
| 41837_at   | AA149431                      | DKFZp761F2014 | 14q32.2       | 5.5  | 0.000972 |
| 44137_at   | AA044830                      | -             | -             | 6.0  | 0.000779 |
| 33182_at   | AI018523                      | DKFZp761J0523 | -             | 6.7  | 0.000389 |
| 54980_at   | AA193340                      | -             | -             | 11.8 | 0.000675 |
| 42282_at   | T58619                        | -             | -             | 14.2 | 0.000860 |
