# Supplementary material
Source: PubMed Central journal article supplement (PMC153613)
Supplement: pnas_0330960100_5.pdf [file pnas_0330960100_5.pdf]

**Table 4. Fold change comparisons between GeneChip and quantitative reverse transcription PCR data<sup>1</sup>**

| Gene                     | GeneChip | TaqMan |
|--------------------------|----------|--------|
| <i>UCP3</i> <sup>2</sup> | -43.3    | -65.5  |
| <i>BCL6</i>              | -3.5     | -3.7   |
| <i>FEZ1</i>              | 1.7      | 2.2    |
| <i>PFKFB1</i>            | -4.1     | -28.7  |
| <i>PHKA1</i>             | -4.2     | -4.5   |
| <i>FADS1</i>             | 3.8      | 6.0    |

<sup>1</sup> Average fold changes across a subset (5-8 normal and 5-6 NM) of specimens.

<sup>2</sup> GeneChip data for UCP3 represent average of three probe sets.
