# Supplementary material
Source: PubMed Central journal article supplement (PMC153613)
Supplement: pnas_0330960100_6.pdf [file pnas_0330960100_6.pdf]

Expression profiling of nemaline myopathy: Sanoudou et al.  
Web supplement "ReINet 1". Relevance network analysis of 206 "reliably changed" probe sets  
across 13 NM skeletal muscle specimens at CCC > 0.8.

**Relevance Networks**

by Atul Butte, MD <atul\_butte@harvard.edu>

Software copyright (C) 1998-2002 by Atul Butte and Children's Hospital, Boston

Please cite Butte AJ, et al., Proceedings of the National Academy of Science USA 97(22):12182-6, 2000.

**Analysis**

Associations computed: 13:36 09/30/2002

Networks constructed: 13:41 09/30/2002

Dissimilarity measure: r

Minimum number of points needed for dissimilarity calculation: 5

Ignore negative and zero expression measures: FALSE

Set negative expression measures to zero: FALSE

Only use points with pairs of P calls in dissimilarity calculations: FALSE

Normalization: none

**Parameters used**

Keep associations greater than: 0.8

Keep associations less than: -0.8

**General description**

Number of networks: 18

Number of features (genes): 202

Number of features (genes) used: 86

Total number of edges possible between 202 features (genes): 20301

Number of edges left after analysis: 90

Absolute value of strongest link from any of the 86 nodes used in this analysis: 0.9684996

Absolute value of weakest link from any of the 86 nodes used in this analysis: 0.8005866

**Histogram**

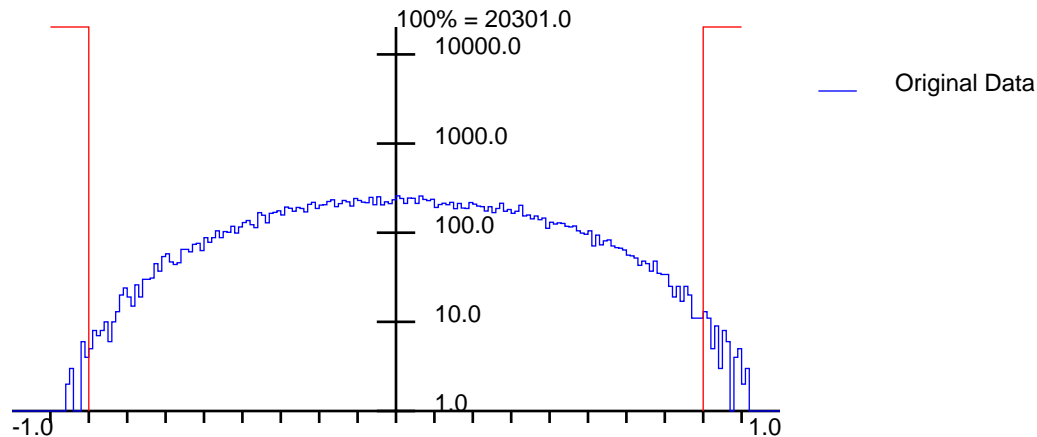

Data ranges from -0.8860942 to 0.9684996.

**Samples Used (13 samples)**

C:\Documents and Settings\Guest\Desktop\S+83Nem.Unnorm.txt\_1

C:\Documents and Settings\Guest\Desktop\S+83Nem.Unnorm.txt\_2

C:\Documents and Settings\Guest\Desktop\S+83Nem.Unnorm.txt\_3

C:\Documents and Settings\Guest\Desktop\S+83Nem.Unnorm.txt\_4

C:\Documents and Settings\Guest\Desktop\S+83Nem.Unnorm.txt\_5

C:\Documents and Settings\Guest\Desktop\S+83Nem.Unnorm.txt\_6

C:\Documents and Settings\Guest\Desktop\S+83Nem.Unnorm.txt\_7

C:\Documents and Settings\Guest\Desktop\S+83Nem.Unnorm.txt\_8

C:\Documents and Settings\Guest\Desktop\S+83Nem.Unnorm.txt\_9

C:\Documents and Settings\Guest\Desktop\S+83Nem.Unnorm.txt\_10

C:\Documents and Settings\Guest\Desktop\S+83Nem.Unnorm.txt\_11

C:\Documents and Settings\Guest\Desktop\S+83Nem.Unnorm.txt\_12

C:\Documents and Settings\Guest\Desktop\S+83Nem.Unnorm.txt\_13

**Network Table of Contents**

**Network 1 (size 3)**

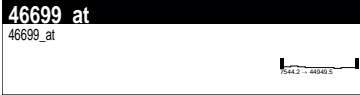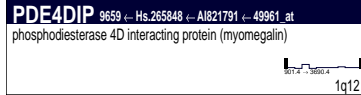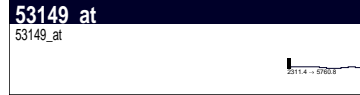

**Network 2 (size 3)**

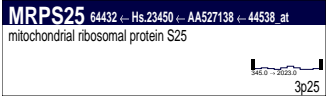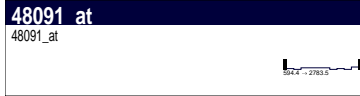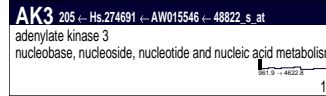

**Network 3 (size 2)**

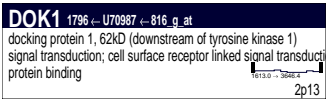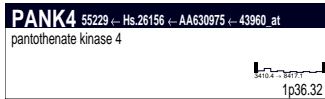

**Network 4 (size 2)**

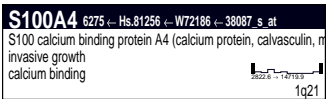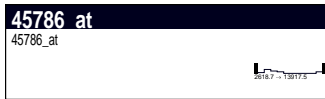

**Network 5 (size 2)**

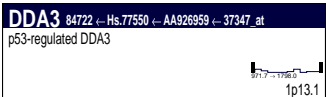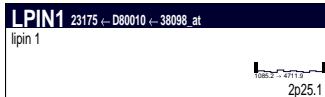

**Network 6 (size 2)**

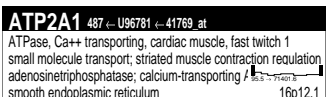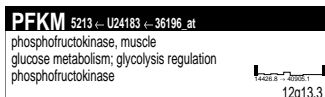

**Network 7 (size 2)**

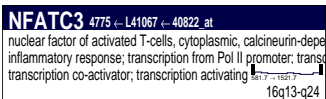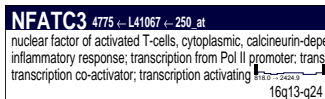

**Network 8 (size 2)**

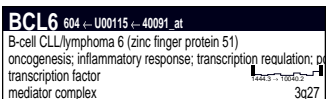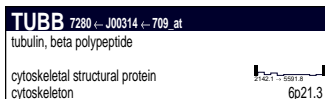

**Network 9 (size 10)**

**PPP6C** 5537 ← X92972 ← 37581 at  
 protein phosphatase 6, catalytic subunit  
 cell shape control; mitotic G1/S transition; protein dephosphorylation  
 protein serine/threonine phosphatase

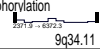

9q34.11

**SFRS2IP** 9169 ← AF030234 ← 35258 f at  
 splicing factor, arginine/serine-rich 2, interacting protein  
 mRNA splicing; mRNA processing  
 pre-mRNA splicing factor  
 nucleus; DNA-directed RNA polymerase II



12p11.21

**E2-EPF** 27338 ← M91670 ← 40619 at  
 ubiquitin carrier protein  
 protein modification



19q13.43

**DMPK** 1760 ← L08835 ← 37996 s at  
 dystrophin myotonic-protein kinase  
 muscle contraction; protein modification  
 protein kinase



19q13.3

**43827 s at**  
 43827\_s\_at



12p11.21

**LDHB** 3945 ← X13794 ← 33819 at  
 lactate dehydrogenase B  
 L-lactate dehydrogenase



12p12.2-p12.1

**50287 at**  
 50287\_at



12p11.21

**42710 at**  
 42710\_at



12p11.21

**TUBG1** 7283 ← M61764 ← 33346 r at  
 tubulin, gamma 1  
 microtubule cytoskeleton organization and biogenesis  
 cytoskeletal structural protein  
 centrosome; microtubule; spindle pole body



17q21

**42711 g at**  
 42711\_g\_at



17q21

### Network 10 (size 2)

**ART3** 419 ← U47054 ← 35134 at  
 ADP-ribosyltransferase 3  
 protein ADP-ribosylation  
 NAD(+) ADP-ribosyltransferase  
 integral plasma membrane protein



4p15.1-p14

**SH3GLB1** 51100 ← AB007960 ← 39691 at  
 SH3-domain GRB2-like endophilin B1



1p22

### Network 11 (size 4)

**CHD3** 1107 ← U91543 ← 34707 at  
 chromodomain helicase DNA binding protein 3  
 chromosome organization and biogenesis; transcription regulation from DNA binding; zinc binding; ATP dependent DNA helicase



17p13.1

**DUSP3** 1845 ← Hs.181046 ← AL049417 ← 41225 at  
 dual specificity phosphatase 3 (vaccinia virus phosphatase VH1)  
 protein dephosphorylation  
 protein tyrosine phosphatase



17q21

**ANXA7** 310 ← J04543 ← 37670 at  
 annexin A7  
 phospholipid binding; voltage-sensitive calcium channel



10q21.1-q21.2

**FDPS** 2224 ← D14697 ← 37325 at  
 farnesyl diphosphate synthase (farnesyl pyrophosphate synthase)  
 cholesterol biosynthesis



1q21.2

### Network 12 (size 3)

**TBC1D4** 9882 ← AB011175 ← 34672 at  
 TBC1 domain family, member 4



13q21.33

**OAZ2** 4947 ← AF057297 ← 36146 at  
 ornithine decarboxylase antizyme 2  
 polyamine metabolism  
 ornithine decarboxylase inhibitor



15q22.1

**SYNE-2** 23224 ← AL080133 ← 41815 at  
 synaptic nuclei expressed gene 2



14q23.1-q23.2

### Network 13 (size 2)

**NEDD4** 4734 ← D42055 ← 32078 at  
 neural precursor cell expressed, developmentally down-regulate  
 developmental processes; sodium ion homeostasis; small molecule ubiquitin-protein ligase  
 cytoplasm



15q

**DKFZP564B1162** 83478 ← Hs.93589 ← AA166703 at  
 hypothetical protein DKFZP564B1162



4q21.23-q21.3

### Network 14 (size 2)

**PPARD** 5467 ← L07592 ← 37152 at  
 peroxisome proliferative activated receptor, delta  
 energy pathways; lipid metabolism; transcription regulation from transcription factor; steroid hormone receptor  
 nucleus



6p21.2-p21.1

**MADH3** 4088 ← U68019 ← 38944 at  
 MAD, mothers against decapentaplegic homolog 3 (Drosophila)  
 transcription from Pol II promoter; TGFbeta receptor signalling  
 tumor suppressor; transcription factor



15q21-q22

### Network 15 (size 3)

**UCP3** 7352 ← U82818 ← 34422\_r\_at  
 uncoupling protein 3 (mitochondrial, proton carrier)  
 respiration; energy pathways; lipid metabolism; proton transport  
 transporter; uncoupling protein  
 mitochondrion; membrane fraction; mitochondrial inner 11q13



**MAN2A2** 4122 ← D55649 ← 41766\_at  
 mannosidase, alpha, class 2A, member 2



**GEMIN7** 79760 ← Hs.102991 ← AA497129 ← 50262\_at  
 gemin 7



### Network 16 (size 2)

**UCP3** 7352 ← U84763 ← 34420\_at  
 uncoupling protein 3 (mitochondrial, proton carrier)  
 respiration; energy pathways; lipid metabolism; proton transport  
 transporter; uncoupling protein  
 mitochondrion; membrane fraction; mitochondrial inner 11q13



**UCP3** 7352 ← U84763 ← 34421\_g\_at  
 uncoupling protein 3 (mitochondrial, proton carrier)  
 respiration; energy pathways; lipid metabolism; proton transport  
 transporter; uncoupling protein  
 mitochondrion; membrane fraction; mitochondrial inner 11q13



### Network 17 (size 36)

**PFKFB1** 5207 ← X52638 ← 33980\_at  
 6-phosphofructo-2-kinase/fructose-2,6-bisphosphatase 1  
 fructose 2,6-bisphosphate metabolism  
 fructose-2,6-bisphosphate 2-phosphatase



**FBP2** 8789 ← Y10812 ← 40293\_at  
 fructose-1,6-bisphosphatase 2  
 fructose metabolism  
 fructose-bisphosphatase



**PGM1** 5236 ← M83088 ← 32210\_at  
 phosphoglucomutase 1



**OPTN** 10133 ← AF070533 ← 41744\_at  
 optineurin  
 cell death; pathogenesis; signal transduction  
 cytoplasm



**OPTN** 10133 ← AF061034 ← 41742\_s\_at  
 optineurin  
 cell death; pathogenesis; signal transduction  
 cytoplasm



**PHYH** 5264 ← AF023462 ← 32724\_at  
 phytanoyl-CoA hydroxylase (Refsum disease)  
 neurogenesis; lipid metabolism  
 enzyme; electron transporter  
 peroxisome



**UBE2D1** 7321 ← AF020761 ← 37826\_at  
 ubiquitin-conjugating enzyme E2D 1 (UBC4/5 homolog, yeast)  
 ubiquitin-dependent protein degradation  
 ubiquitin-protein ligase; ubiquitin conjugating enzyme



**34194\_at**  
 34194\_at



**FADS1** 3992 ← Hs.132898 ← AF009767 ← 41720\_r\_at  
 fatty acid desaturase 1  
 fatty acid desaturation  
 C-5 sterol desaturase  
 integral membrane protein



**PPP1R2** 5504 ← U68111 ← 33180\_at  
 protein phosphatase 1, regulatory (inhibitor) subunit 2  
 energy pathways  
 type 1 serine/threonine specific protein phosphatase inhibitor



**IMPA2** 3613 ← AF014398 ← 36496\_at  
 inositol(myo)-1(or 4)-monophosphatase 2  
 signal transduction; phosphate metabolism  
 myo-inositol-1(or 4)-monophosphatase



**MN1** 4330 ← X82209 ← 37283\_at  
 meningioma (disrupted in balanced translocation) 1



**PPP1R2** 5504 ← U68111 ← 312\_at  
 protein phosphatase 1, regulatory (inhibitor) subunit 2  
 energy pathways  
 type 1 serine/threonine specific protein phosphatase inhibitor



**PHKB** 5257 ← X84908 ← 37392\_at  
 phosphorylase kinase, beta  
 energy pathways; glycogen metabolism; glycogen catabolism  
 phosphorylase kinase; phosphorylase kinase regulator



**1164\_at**  
 1164\_at



**FHL3** 2275 ← Hs.57687 ← A1375210 ← 53162\_at  
 four and a half LIM domains 3  
 muscle development



**DAF** 1604 ← M31516 ← 39895\_at  
 decay accelerating factor for complement (CD55, Cromer blood group s)  
 soluble fraction; integral plasma membrane protein



**FLJ20739** 55673 ← Hs.46679 ← A1620923 ← 52145\_at  
 hypothetical protein FLJ20739



**KIAA1917** 114804 ← Hs.294151 ← A1745248 ← 44600\_at  
 KIAA1917 protein



**53198\_at**  
 53198\_at



**KUB3** 91419 ← Hs.61188 ← A1525818 ← 53933\_at  
 Ku70-binding protein 3



**55989\_at**  
 55989\_at



**MAGED2** 10916 ← Z98046 ← 34860\_g\_at  
 melanoma antigen, family D, 2



**FLJ20811** 54470 ←- Hs.83530 ←- AA015605 ←- 38440 s\_at  
hypothetical protein FLJ20811

Xq21.33-q22.3

**TUBB** 7280 ←- Hs.336780 ←- AF035316 ←- 39332 at  
tubulin, beta polypeptide

cytoskeletal structural protein  
cytoskeleton

6p21.3

**TUBA3** 7846 ←- X01703 ←- 40567 at  
tubulin, alpha 3

neurogenesis; glia cell differentiation; cell shape and cell size control  
cytoskeletal structural protein  
microtubule

12q12-12q14.3

**45773 at**  
45773\_at

12q11.1-12q11.5

**MAN2A2** 4122 ←- L28821 ←- 38188 s\_at  
mannosidase, alpha, class 2A, member 2

15q25

**FLJ12168** 79735 ←- Hs.325860 ←- AI361002 ←- 57547 at  
hypothetical protein FLJ12168

19q13.33

**CDK4** 1019 ←- U37022 ←- 1942 s\_at  
cyclin-dependent kinase 4

oncogenesis; cell cycle control; cell proliferation; mitotic G1/S transition  
cyclin-dependent protein kinase

12q14

**ADCY9** 115 ←- AF036927 ←- 33800 at  
adenylate cyclase 9

signal transduction  
adenylate cyclase  
integral plasma membrane protein

16p13.3

**KIAA0469** 9903 ←- AB007938 ←- 37230 at  
KIAA0469 gene product

1p36.23

**54028 at**  
54028\_at

9q34.3

**RXRA** 6256 ←- U66306 ←- 32800 at  
retinoid X receptor, alpha

vitamin metabolism; signal transduction  
DNA binding; retinoid-X receptor; retinoic acid re  
nucleus

9q34.3

**CARM1** 10488 ←- AF055027 ←- 40182 s\_at  
coactivator-associated arginine methyltransferase-1

19p13.2

**PTOV1** 53635 ←- Hs.19555 ←- W25984 ←- 32130 at  
prostate tumor over expressed gene 1

19q13.33

## Network 18 (size 4)

**TBXA2R** 6915; 58509; 126326 ←- [3 genes] ←- 32914\_f.at ←- 32914\_f.g  
thromboxane A2 receptor

respiration; muscle contraction; G-protein linked receptor protein signal  
thromboxane A2 receptor  
plasma membrane; integral plasma membrane protein

19p13.3

**PHKA1** 5255 ←- X73674 ←- 39291 at  
phosphorylase kinase, alpha 1 (muscle)

energy pathways; glycogen metabolism; glycogen catabolism  
phosphorylase kinase; phosphorylase kinase regulator

Xq12-q13

**51756 at**  
51756\_at

8q24

**KIAA0399** 23140 ←- AB007859 ←- 38626 at  
KIAA0399 protein

17p13.3

End of Network Table of Contents

# Relevance Networks Legend

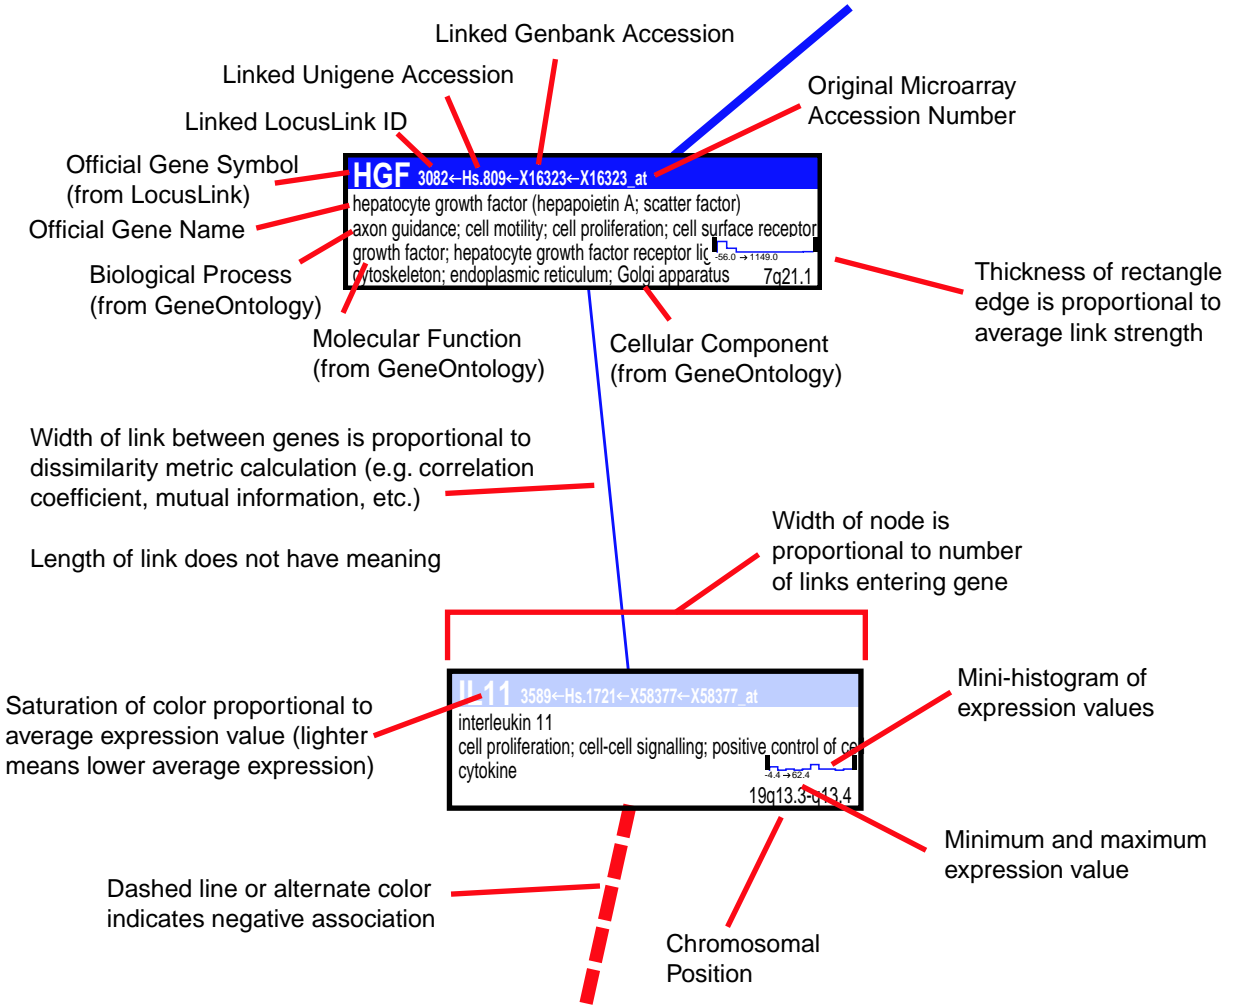

**53149 at**

53149\_at

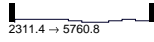

**PDE4DIP** 9659 ← Hs.265848 ← AI821791 ← 49961 at

phosphodiesterase 4D interacting protein (myomegalin)

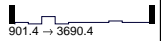

1q12

**46699 at**

46699\_at

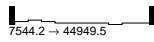

**AK3** 205 ← Hs.274691 ← AW015546 ← 48822\_s\_at  
adenylate kinase 3  
nucleobase, nucleoside, nucleotide and nucleic acid metabolism

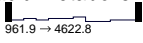

1

**48091 at**  
48091\_at



**MRPS25** 64432 ← Hs.23450 ← AA527138 ← 44538\_at  
mitochondrial ribosomal protein S25



3p25



**PANK4** 55229 ← Hs.26156 ← AA630975 ← 43960\_at

pantothenate kinase 4

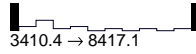

1p36.32

**DOK1** 1796 ← U70987 ← 816\_g\_at

docking protein 1, 62kD (downstream of tyrosine kinase 1)  
signal transduction; cell surface receptor linked signal transduction  
protein binding

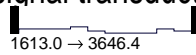

2p13

**45786 at**

45786\_at

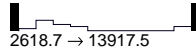

**S100A4** 6275 ← Hs.81256 ← W72186 ← 38087\_s\_at

S100 calcium binding protein A4 (calcium protein, calvasculin, m  
invasive growth  
calcium binding

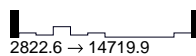

1q21

**LPIN1** 23175 ← D80010 ← 38098\_at

lipin 1

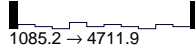

2p25.1

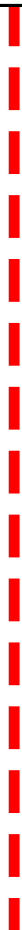

**DDA3** 84722 ← Hs.77550 ← AA926959 ← 37347\_at

p53-regulated DDA3

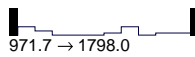

1p13.1

**PFKM** 5213 ← U24183 ← 36196\_at

phosphofructokinase, muscle  
glucose metabolism; glycolysis regulation  
phosphofructokinase

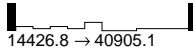

12q13.3

**ATP2A1** 487 ← U96781 ← 41769\_at

ATPase, Ca<sup>++</sup> transporting, cardiac muscle, fast twitch 1  
small molecule transport; striated muscle contraction regulation  
adenosinetriphosphatase; calcium-transporting A  
smooth endoplasmic reticulum

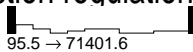

16p12.1

**NFATC3** 4775 ← L41067 ← 250\_at

nuclear factor of activated T-cells, cytoplasmic, calcineurin-depe  
inflammatory response; transcription from Pol II promoter; trans  
transcription co-activator; transcription activating

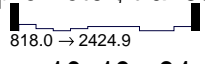

16q13-q24

**NFATC3** 4775 ← L41067 ← 40822\_at

nuclear factor of activated T-cells, cytoplasmic, calcineurin-depe  
inflammatory response; transcription from Pol II promoter; trans  
transcription co-activator; transcription activating

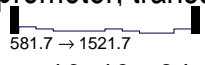

16q13-q24

**TUBB** 7280 ← J00314 ← 709\_at

tubulin, beta polypeptide

cytoskeletal structural protein  
cytoskeleton

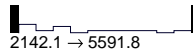

6p21.3

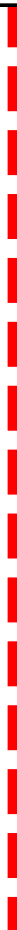

**BCL6** 604 ← U00115 ← 40091\_at

B-cell CLL/lymphoma 6 (zinc finger protein 51)  
oncogenesis; inflammatory response; transcription regulation; po  
transcription factor  
mediator complex

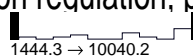

3q27

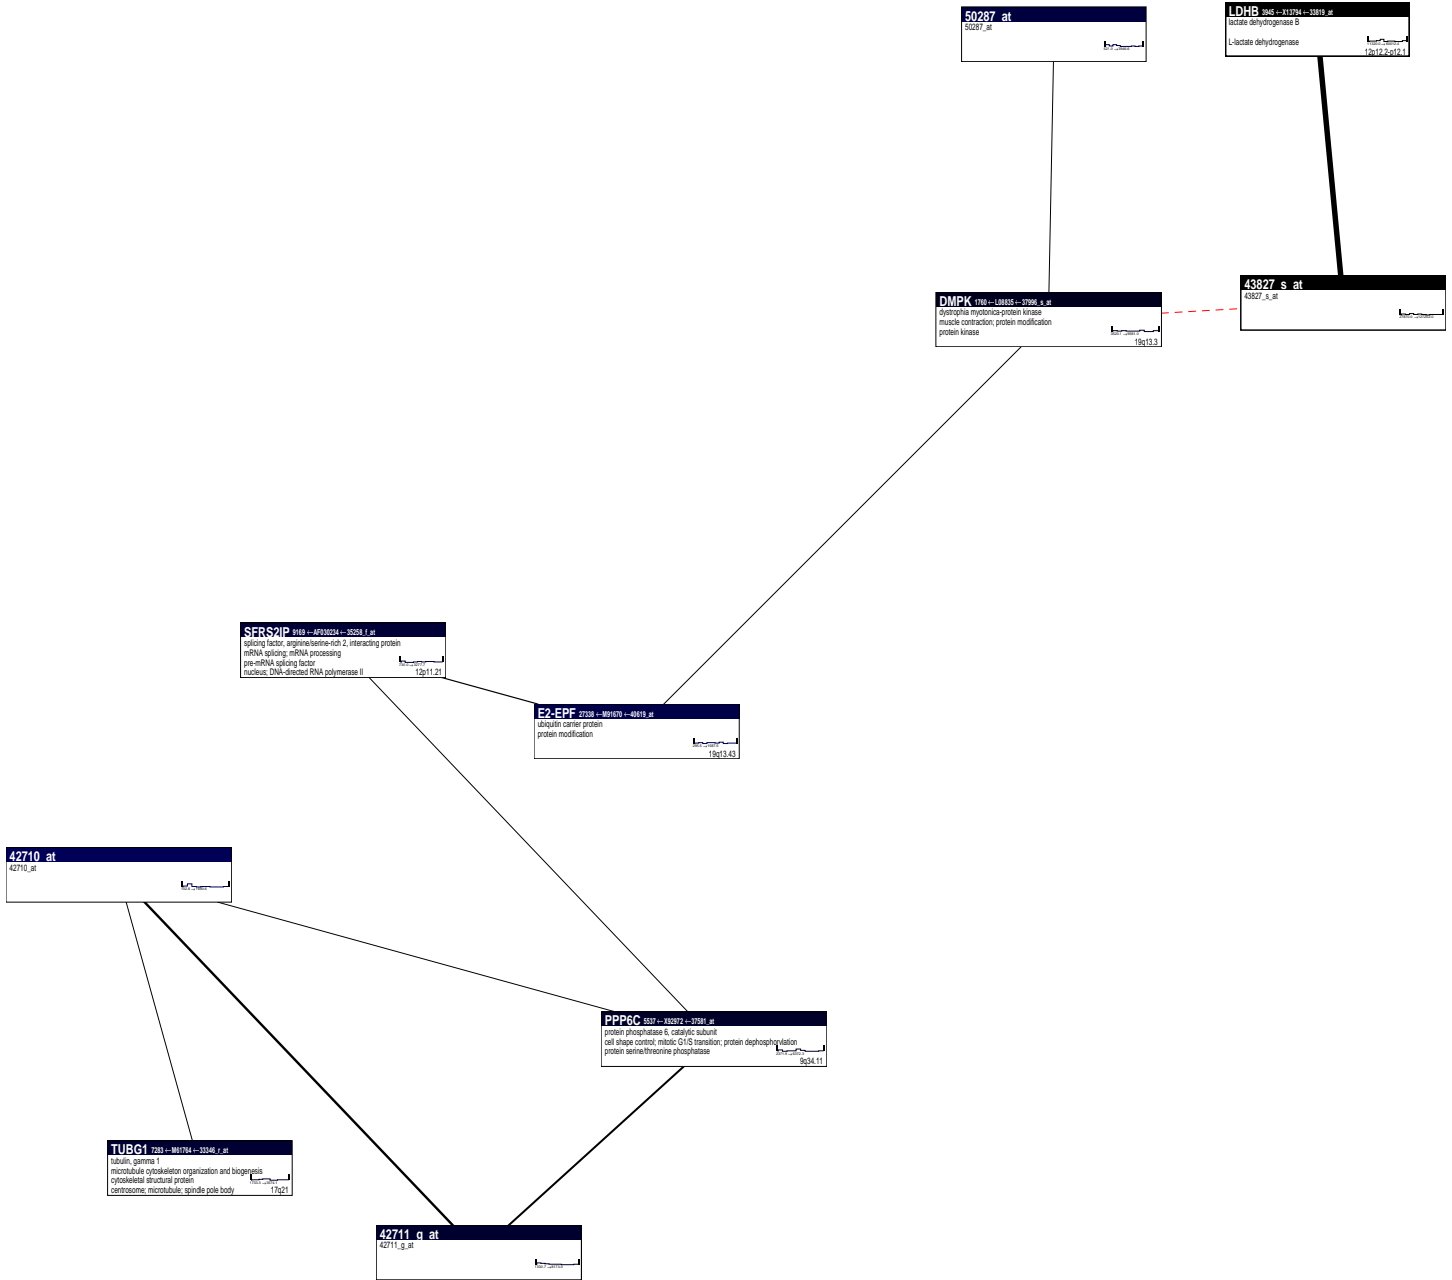

**SH3GLB1** 51100 ← AB007960 ← 39691\_at

SH3-domain GRB2-like endophilin B1

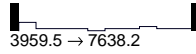

1p22

**ART3** 419 ← U47054 ← 35134\_at

ADP-ribosyltransferase 3  
protein ADP-ribosylation  
NAD(+) ADP-ribosyltransferase  
integral plasma membrane protein

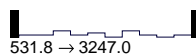

4p15.1-p14



**DUSP3** 1845 ← Hs.181046 ← AL049417 ← 41225\_at  
 dual specificity phosphatase 3 (vaccinia virus phosphatase VH1)  
 protein dephosphorylation  
 protein tyrosine phosphatase  
 1728.8 → 7663.5  
 17q21

**CHD3** 1107 ← U91543 ← 34707\_at  
 chromodomain helicase DNA binding protein 3  
 chromosome organization and biogenesis; transcription regulation from  
 DNA binding; zinc binding; ATP dependent DNA helicase  
 1508.0 → 3841.4  
 17p13.1

**FDPS** 2224 ← D14697 ← 37325\_at  
 farnesyl diphosphate synthase (farnesyl pyrophosphate synthetase)  
 cholesterol biosynthesis  
 1454.7 → 3310.8  
 1q21.2

**ANXA7** 310 ← J04543 ← 37670\_at  
 annexin A7  
 phospholipid binding; voltage-sensitive calcium channel  
 1275.5 → 4431.4  
 10q21.1-q21.2

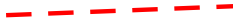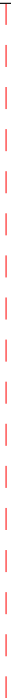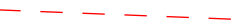

**SYNE-2** 23224 ← AL080133 ← 41815\_at  
synaptic nuclei expressed gene 2

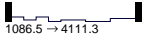

1086.5 → 4111.3  
14q23.1-q23.2

**OAZ2** 4947 ← AF057297 ← 36146\_at  
ornithine decarboxylase antizyme 2  
polyamine metabolism  
ornithine decarboxylase inhibitor

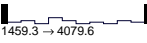

1459.3 → 4079.6  
15q22.1

**TBC1D4** 9882 ← AB011175 ← 34672\_at  
TBC1 domain family, member 4

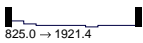

825.0 → 1921.4  
13q21.33

**DKFZP564B1162** 83478 ← Hs.93589 ← AA166703 ← 4

hypothetical protein DKFZp564B1162

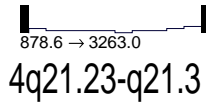

**NEDD4** 4734 ← D42055 ← 32078\_at

neural precursor cell expressed, developmentally down-regulate  
developmental processes; sodium ion homeostasis; small molec  
ubiquitin--protein ligase  
cytoplasm

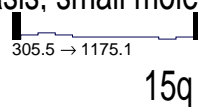

**MADH3** 4088 ← U68019 ← 38944\_at

MAD, mothers against decapentaplegic homolog 3 (Drosophila)  
transcription from Pol II promoter; TGFbeta receptor signalling p  
tumor suppressor; transcription factor

314.6 → 1142.1

15q21-q22

**PPARD** 5467 ← L07592 ← 37152\_at

peroxisome proliferative activated receptor, delta  
energy pathways; lipid metabolism; transcription regulation from  
transcription factor; steroid hormone receptor  
nucleus

257.5 → 2040.7

6p21.2-p21.1

**GEMIN7** 79760 ← Hs.102991 ← AA497129 ← 50262\_at  
gemin 7

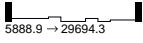

5888.9 → 29664.3  
19q13.32

**MAN2A2** 4122 ← D55649 ← 41766\_at  
mannosidase, alpha, class 2A, member 2



423.5 → 2502.0  
15q25

**UCP3** 7352 ← U82818 ← 34422\_r\_at  
uncoupling protein 3 (mitochondrial, proton carrier)  
respiration; energy pathways; lipid metabolism; proton transport  
transporter; uncoupling protein  
mitochondrion; membrane fraction; mitochondrial inner 11q13



418.5 → 2848.7  
11q13

## UCP3 7352 ← U84763 ← 34421\_g\_at

uncoupling protein 3 (mitochondrial, proton carrier)  
respiration; energy pathways; lipid metabolism; proton transport  
transporter; uncoupling protein  
mitochondrion; membrane fraction; mitochondrial inner 11q13

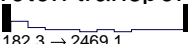

## UCP3 7352 ← U84763 ← 34420\_at

uncoupling protein 3 (mitochondrial, proton carrier)  
respiration; energy pathways; lipid metabolism; proton transport  
transporter; uncoupling protein  
mitochondrion; membrane fraction; mitochondrial inner 11q13

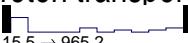

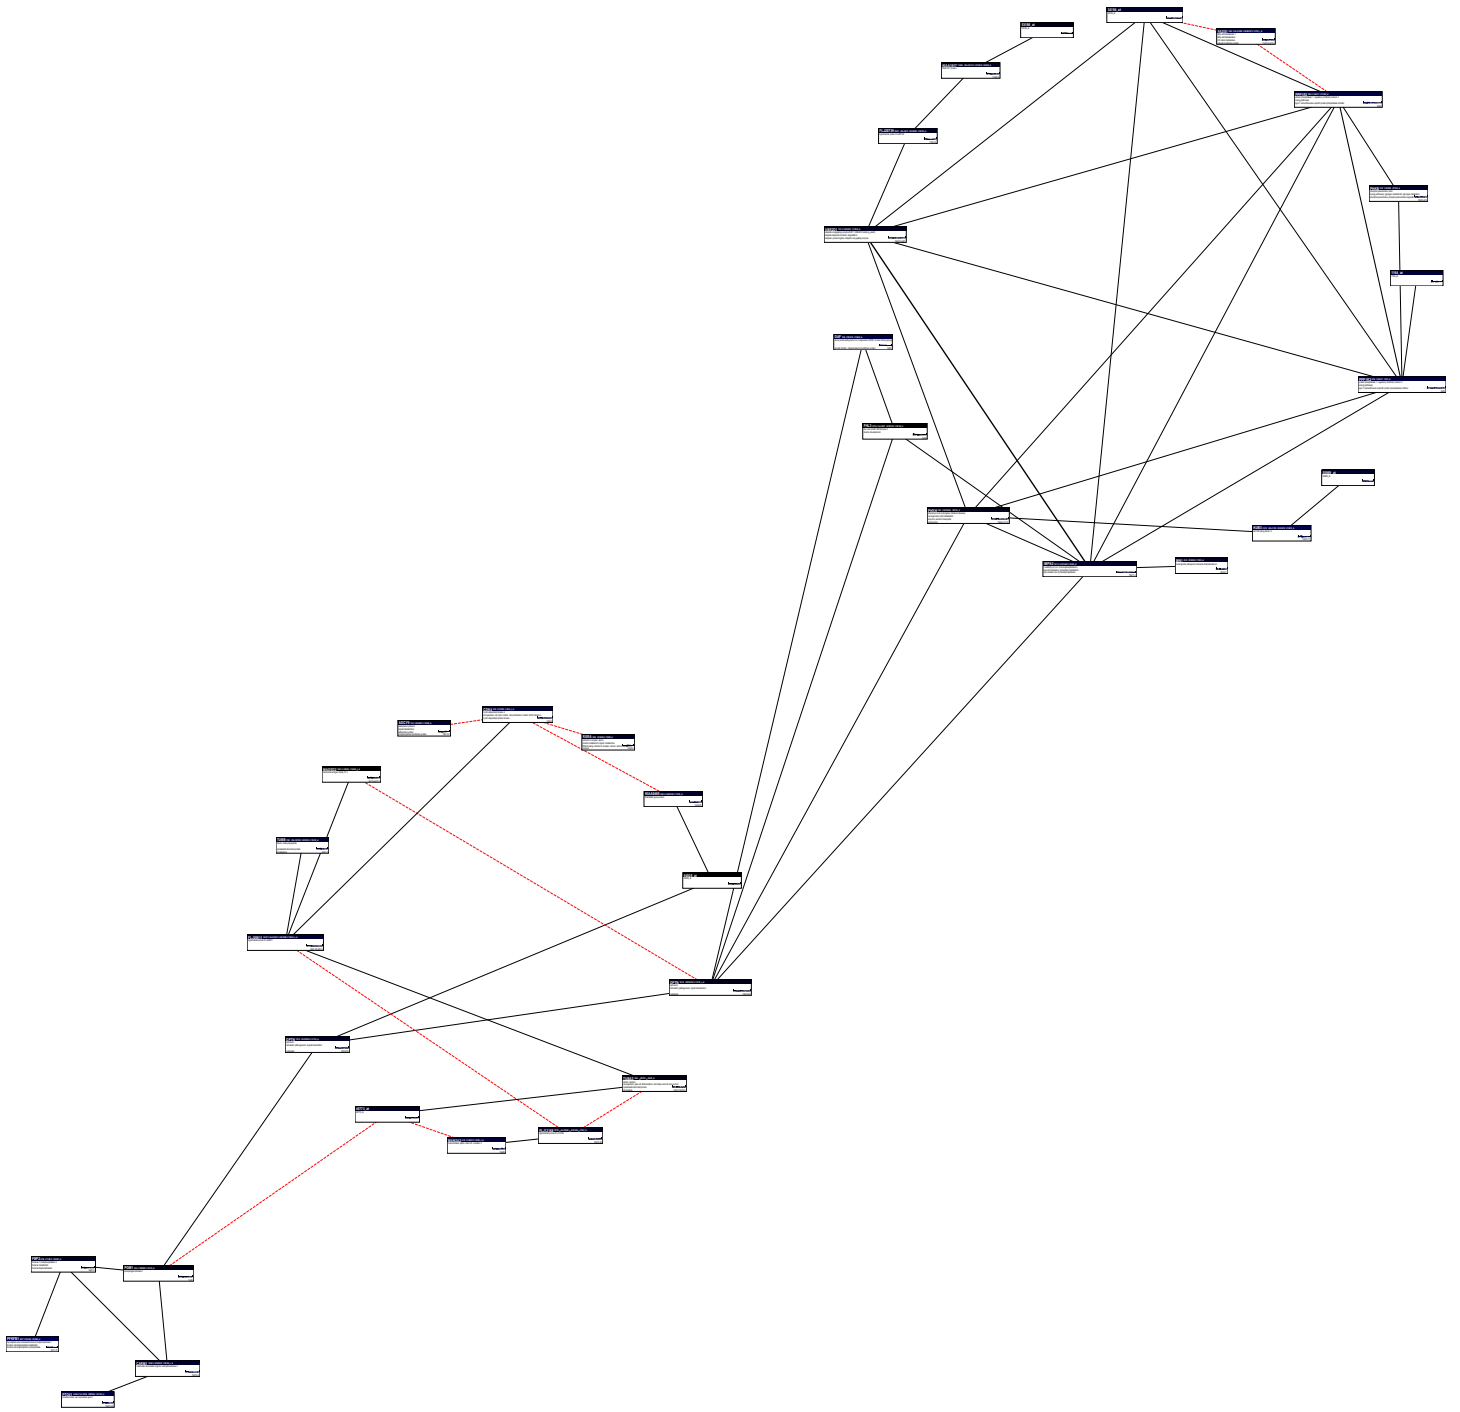

**KIAA0399** 23140 ← AB007859 ← 38626\_at  
 KIAA0399 protein  
 428.5 → 1489.5  
 17p13.3

**51756 at**  
 51756\_at  
 335.2 → 5180.7

**PHKA1** 5255 ← X73874 ← 39291\_at  
 phosphorylase kinase, alpha 1 (muscle)  
 energy pathways; glycogen metabolism; glycogen catabolism  
 phosphorylase kinase; phosphorylase kinase regulator  
 194.4 → 3858.3  
 Xq12-q13

**TBXA2R** 6915; 58509; 126326 ← [3 genes] ← 32914\_f\_at ← 32914\_f\_a  
 thromboxane A2 receptor  
 respiration; muscle contraction; G-protein linked receptor protein signal  
 thromboxane A2 receptor  
 plasma membrane; integral plasma membrane protein  
 751.5 → 2040.6  
 19p13.3
