# Supplementary material
Source: PubMed Central journal article supplement (PMC153613)
Supplement: pnas_0330960100_7.pdf [file pnas_0330960100_7.pdf]

Expression profiling of nemaline myopathy: Sanoudou et al.  
Web supplement "ReINet 2". Relevance network analysis of 206 "reliably changed" probe sets  
across 21 normal skeletal muscle specimens at CCC > 0.8.

**Relevance Networks**

by Atul Butte, MD <atul\_butte@harvard.edu>

Software copyright (C) 1998-2002 by Atul Butte and Children's Hospital, Boston

Please cite Butte AJ, et al., Proceedings of the National Academy of Science USA 97(22):12182-6, 2000.

**Analysis**

Associations computed: 13:23 09/30/2002

Networks constructed: 13:44 09/30/2002

Dissimilarity measure: r

Minimum number of points needed for dissimilarity calculation: 5

Ignore negative and zero expression measures: FALSE

Set negative expression measures to zero: FALSE

Only use points with pairs of P calls in dissimilarity calculations: FALSE

Normalization: none

**Parameters used**

Keep associations greater than: 0.8

Keep associations less than: -0.8

**General description**

Number of networks: 19

Number of features (genes): 202

Number of features (genes) used: 59

Total number of edges possible between 202 features (genes): 20301

Number of edges left after analysis: 43

Absolute value of strongest link from any of the 59 nodes used in this analysis: 0.9602087

Absolute value of weakest link from any of the 59 nodes used in this analysis: 0.8045203

**Histogram**

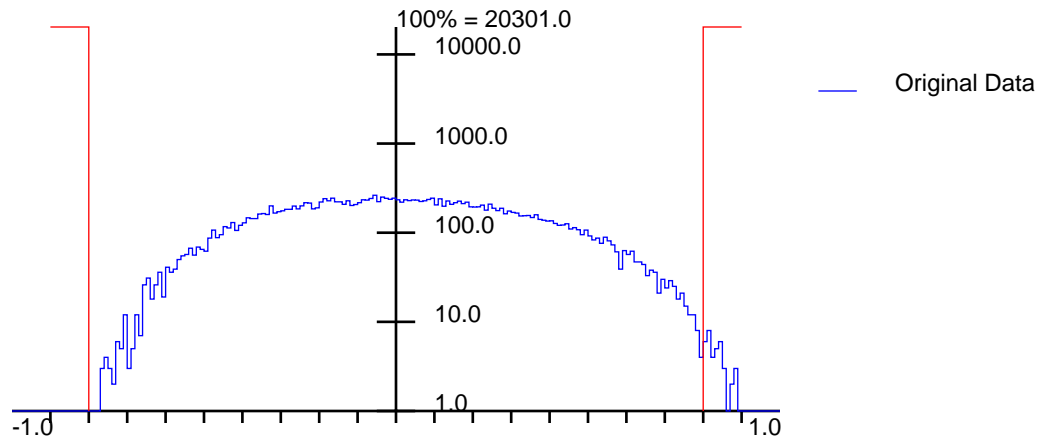

Data ranges from -0.81874144 to 0.9602087.

**Samples Used (21 samples)**

C:\Documents and Settings\Guest\Desktop\S+83Norm.Unnorm.txt\_1

C:\Documents and Settings\Guest\Desktop\S+83Norm.Unnorm.txt\_2

C:\Documents and Settings\Guest\Desktop\S+83Norm.Unnorm.txt\_3

C:\Documents and Settings\Guest\Desktop\S+83Norm.Unnorm.txt\_4

C:\Documents and Settings\Guest\Desktop\S+83Norm.Unnorm.txt\_5

C:\Documents and Settings\Guest\Desktop\S+83Norm.Unnorm.txt\_6

C:\Documents and Settings\Guest\Desktop\S+83Norm.Unnorm.txt\_7

C:\Documents and Settings\Guest\Desktop\S+83Norm.Unnorm.txt\_8

C:\Documents and Settings\Guest\Desktop\S+83Norm.Unnorm.txt\_9

C:\Documents and Settings\Guest\Desktop\S+83Norm.Unnorm.txt\_10

C:\Documents and Settings\Guest\Desktop\S+83Norm.Unnorm.txt\_11

C:\Documents and Settings\Guest\Desktop\S+83Norm.Unnorm.txt\_12

C:\Documents and Settings\Guest\Desktop\S+83Norm.Unnorm.txt\_13

C:\Documents and Settings\Guest\Desktop\S+83Norm.Unnorm.txt\_14

C:\Documents and Settings\Guest\Desktop\S+83Norm.Unnorm.txt\_15

C:\Documents and Settings\Guest\Desktop\S+83Norm.Unnorm.txt\_16

C:\Documents and Settings\Guest\Desktop\S+83Norm.Unnorm.txt\_17

C:\Documents and Settings\Guest\Desktop\S+83Norm.Unnorm.txt\_18

C:\Documents and Settings\Guest\Desktop\S+83Norm.Unnorm.txt\_19

C:\Documents and Settings\Guest\Desktop\S+83Norm.Unnorm.txt\_20

C:\Documents and Settings\Guest\Desktop\S+83Norm.Unnorm.txt\_21

## Network Table of Contents

### Network 1 (size 3)

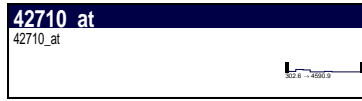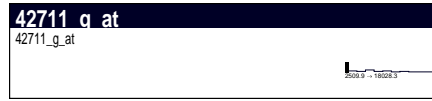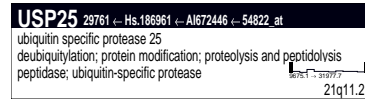

### Network 2 (size 5)

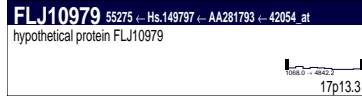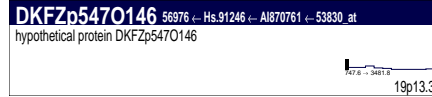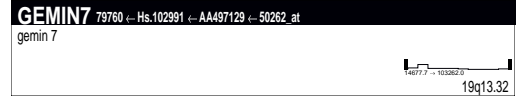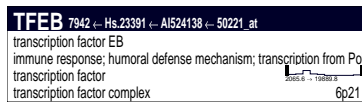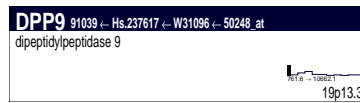

### Network 3 (size 2)

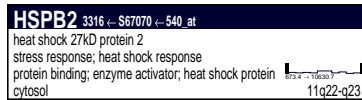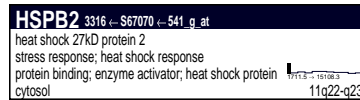

### Network 4 (size 2)

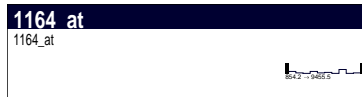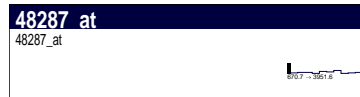

### Network 5 (size 2)

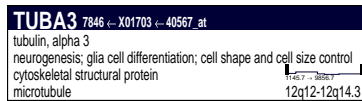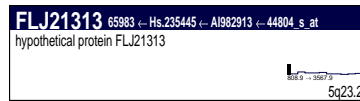

### Network 6 (size 2)

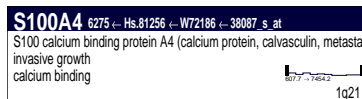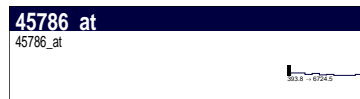

### Network 7 (size 2)

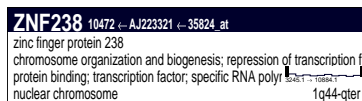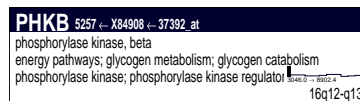

### Network 8 (size 2)

**MAGED2** 10916 ← Z38046 ← 34860\_g\_at  
melanoma antigen, family D, 2



Xp11.4-p11.1

**FLJ20811** 54470 ← Hs.83530 ← AA015605 ← 38440\_s\_at  
hypothetical protein FLJ20811



Xq21.33-q22.3

### Network 9 (size 2)

**LDHB** 3945 ← X13794 ← 33819\_at  
lactate dehydrogenase B

L-lactate dehydrogenase



12p12.2-p12.1

**43827\_s\_at**  
43827\_s\_at



### Network 10 (size 2)

**PEA15** 8682 ← Hs.194673 ← X86809 ← 32260\_at  
phosphoprotein enriched in astrocytes 15  
small molecule transport



1q21.1

**AK3** 205 ← Hs.274691 ← AW015546 ← 48822\_s\_at  
adenylate kinase 3  
nucleobase, nucleoside, nucleotide and nucleic acid metabolism



1

### Network 11 (size 8)

**DAF** 1604 ← M31516 ← 38895\_at  
decay accelerating factor for complement (CD55, Cromer blood group system)

soluble fraction; integral plasma membrane protein



1q32

**BCL6** 604 ← U00115 ← 40891\_at  
B-cell CLL/lymphoma 6 (zinc finger protein 51)  
oncogenesis; inflammatory response; transcription regulation; positive control of cell proliferation; repression of transcription factor mediator complex

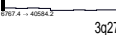

3q27

**GLUL** 2752 ← X59834 ← 40522\_at  
glutamate-ammonia ligase (glutamine synthase)  
glutamine biosynthesis; neurotransmitter maintenance



1q31

**48063\_at**  
48063\_at



**45773\_at**  
45773\_at



**46699\_at**  
46699\_at



**50763\_at**  
50763\_at



**KIAA1917** 114804 ← Hs.294151 ← A1745248 ← 44600\_at  
KIAA1917 protein



17q25.3

### Network 12 (size 3)

**SH3GLB1** 51100 ← AB007960 ← 39691\_at  
SH3-domain GRB2-like endophilin B1



1p22

**USP24** 23358 ← AB028980 ← 35847\_at  
ubiquitin specific protease 24



1p32.2

**OPTN** 10133 ← AF070533 ← 41744\_at  
optineurin  
cell death; pathogenesis; signal transduction

cytoplasm



10p12.33

### Network 13 (size 2)

**FTHFD** 10840 ← AF052732 ← 38316\_at  
formyltetrahydrofolate dehydrogenase  
10-formyltetrahydrofolate catabolism  
enzyme; electron transporter



3q21.3

**RAF1** 5894 ← X03484 ← 1917\_at  
v-raf-1 murine leukemia viral oncogene homolog 1  
apoptosis; oncogenesis; cell proliferation; signal transduction; protein tyrosine kinase

mitochondrial outer membrane



3p25

### Network 14 (size 3)

**LSP1** 4046 ← M33552 ← 36493\_at  
lymphocyte-specific protein 1  
cell motility; cellular defense response; cell shape and cell size control  
actin binding  
actin cytoskeleton



11p15.5

**54980\_at**  
54980\_at



**55894\_at**  
55894\_at



### Network 15 (size 2)

**P7OV1** 53635 ← Hs.19555 ← W25984 ← 32130\_at  
 prostate tumor over expressed gene 1  


**RERE** 473 ← AB007927 ← 32253\_at  
 arginine-glutamic acid dipeptide (RE) repeats  
 NLS-bearing substrate-nucleus import  
 molecular\_function unknown; poly-glutamine tract bind  
 nucleus  


### Network 16 (size 4)

**UBE2D1** 7321 ← AF020761 ← 37826\_at  
 ubiquitin-conjugating enzyme E2D 1 (UBC4/5 homolog, yeast)  
 ubiquitin-dependent protein degradation  
 ubiquitin-protein ligase; ubiquitin conjugating enzyme  


**ZNF161** 7716 ← D28118 ← 350\_at  
 zinc finger protein 161  
 cellular defense response; transcription regulation from Pol II promoter  
 specific RNA polymerase II transcription factor  


**ZNF161** 7716 ← D28118 ← 32828\_at  
 zinc finger protein 161  
 cellular defense response; transcription regulation from Pol II promoter  
 specific RNA polymerase II transcription factor  


**55989** at  
 55989\_at  


### Network 17 (size 5)

**UCP3** 7352 ← U84763 ← 34420\_at  
 uncoupling protein 3 (mitochondrial, proton carrier)  
 respiration; energy pathways; lipid metabolism; proton transport  
 transporter; uncoupling protein  
 mitochondrion; membrane fraction; mitochondrial inner membrane  


**UCP3** 7352 ← U84763 ← 34421\_g\_at  
 uncoupling protein 3 (mitochondrial, proton carrier)  
 respiration; energy pathways; lipid metabolism; proton transport  
 transporter; uncoupling protein  
 mitochondrion; membrane fraction; mitochondrial inner membr.  


**UCP3** 7352 ← U82818 ← 34422\_r\_at  
 uncoupling protein 3 (mitochondrial, proton carrier)  
 respiration; energy pathways; lipid metabolism; proton transport  
 transporter; uncoupling protein  
 mitochondrion; membrane fraction; mitochondrial inner membrane  


**54028** at  
 54028\_at  


**46671** at  
 46671\_at  


### Network 18 (size 5)

**PFKFB1** 5207 ← X52638 ← 33980\_at  
 6-phosphofructo-2-kinase/fructose-2,6-bisphosphatase 1  
 fructose 2,6-bisphosphate metabolism  
 fructose-2,6-bisphosphate 2-phosphatase  


**FBP2** 8789 ← Y10812 ← 40293\_at  
 fructose-1,6-bisphosphatase 2  
 fructose metabolism  
 fructose-bisphosphatase  


**50751** at  
 50751\_at  


**44112** at  
 44112\_at  


**PGM1** 5236 ← M83088 ← 32210\_at  
 phosphoglucomutase 1  


### Network 19 (size 3)

**LKAP** 9665 ← AB007890 ← 31936\_s\_at  
 limkain b1  


**UBE4A** 9354 ← D50916 ← 36579\_at  
 ubiquitination factor E4A (UFD2 homolog, yeast)  
 ubiquitin-dependent protein degradation  
 ubiquitin conjugating enzyme  
 ubiquitin ligase complex  


**SIRT1** 23411 ← Hs.31176 ← AI381553 ← 46399\_at  
 sirtuin silent mating type information regulation 2 homolog 1 (S. cerevis)  
 chromatin silencing; protein ADP-ribosylation  
 NAD(+) ADP-ribosyltransferase  


End of Network Table of Contents

# Relevance Networks Legend

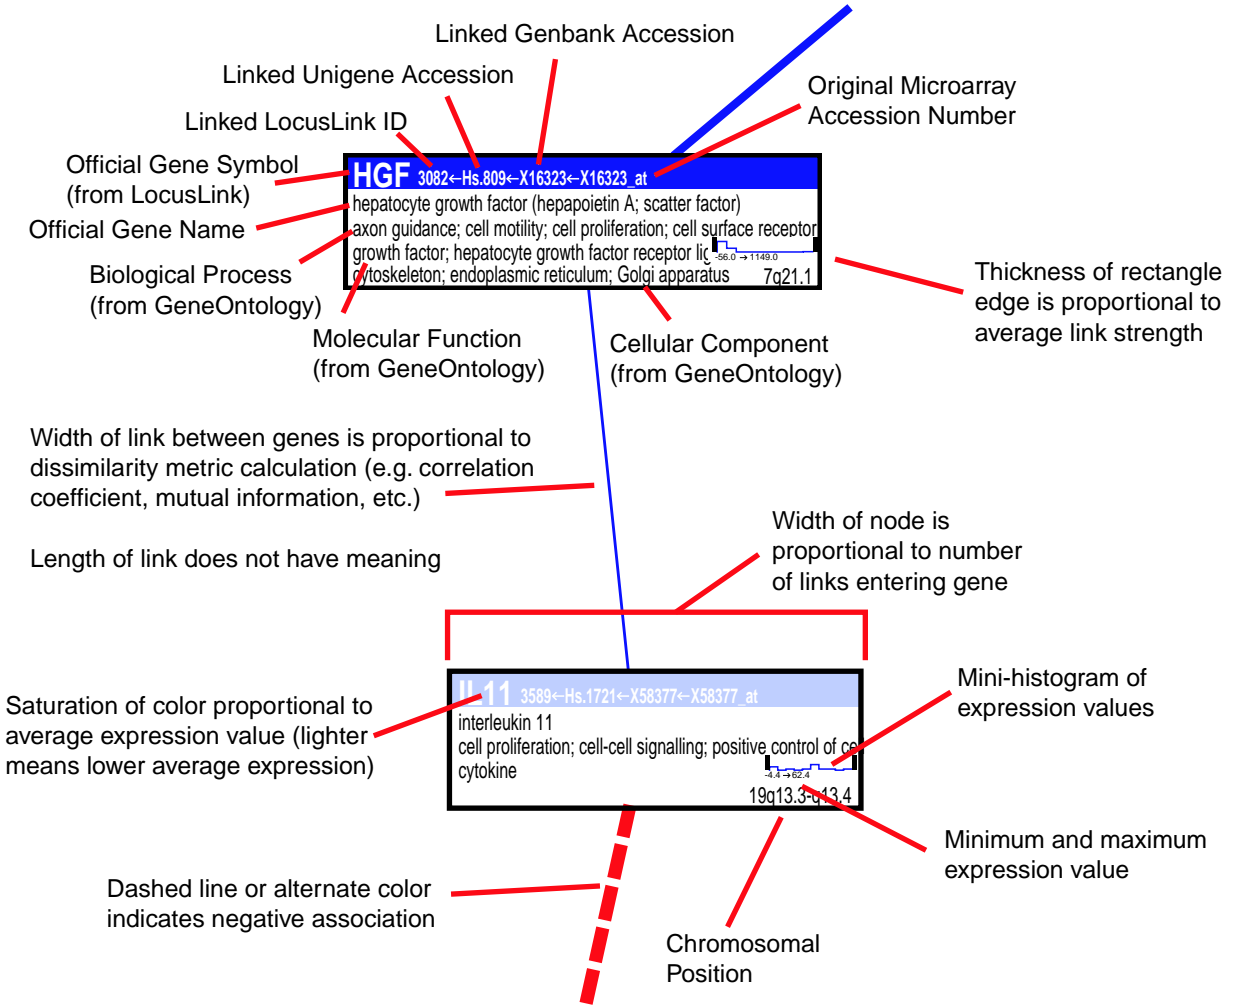

**USP25** 29761 ← Hs.186961 ← AI672446 ← 54822\_at  
ubiquitin specific protease 25  
deubiquitylation; protein modification; proteolysis and peptidolysis  
peptidase; ubiquitin-specific protease  
9675.1 → 31977.7  
21q11.2

**42711 g at**  
42711\_g\_at  
2509.9 → 18028.3

**42710 at**  
42710\_at  
302.6 → 4590.9

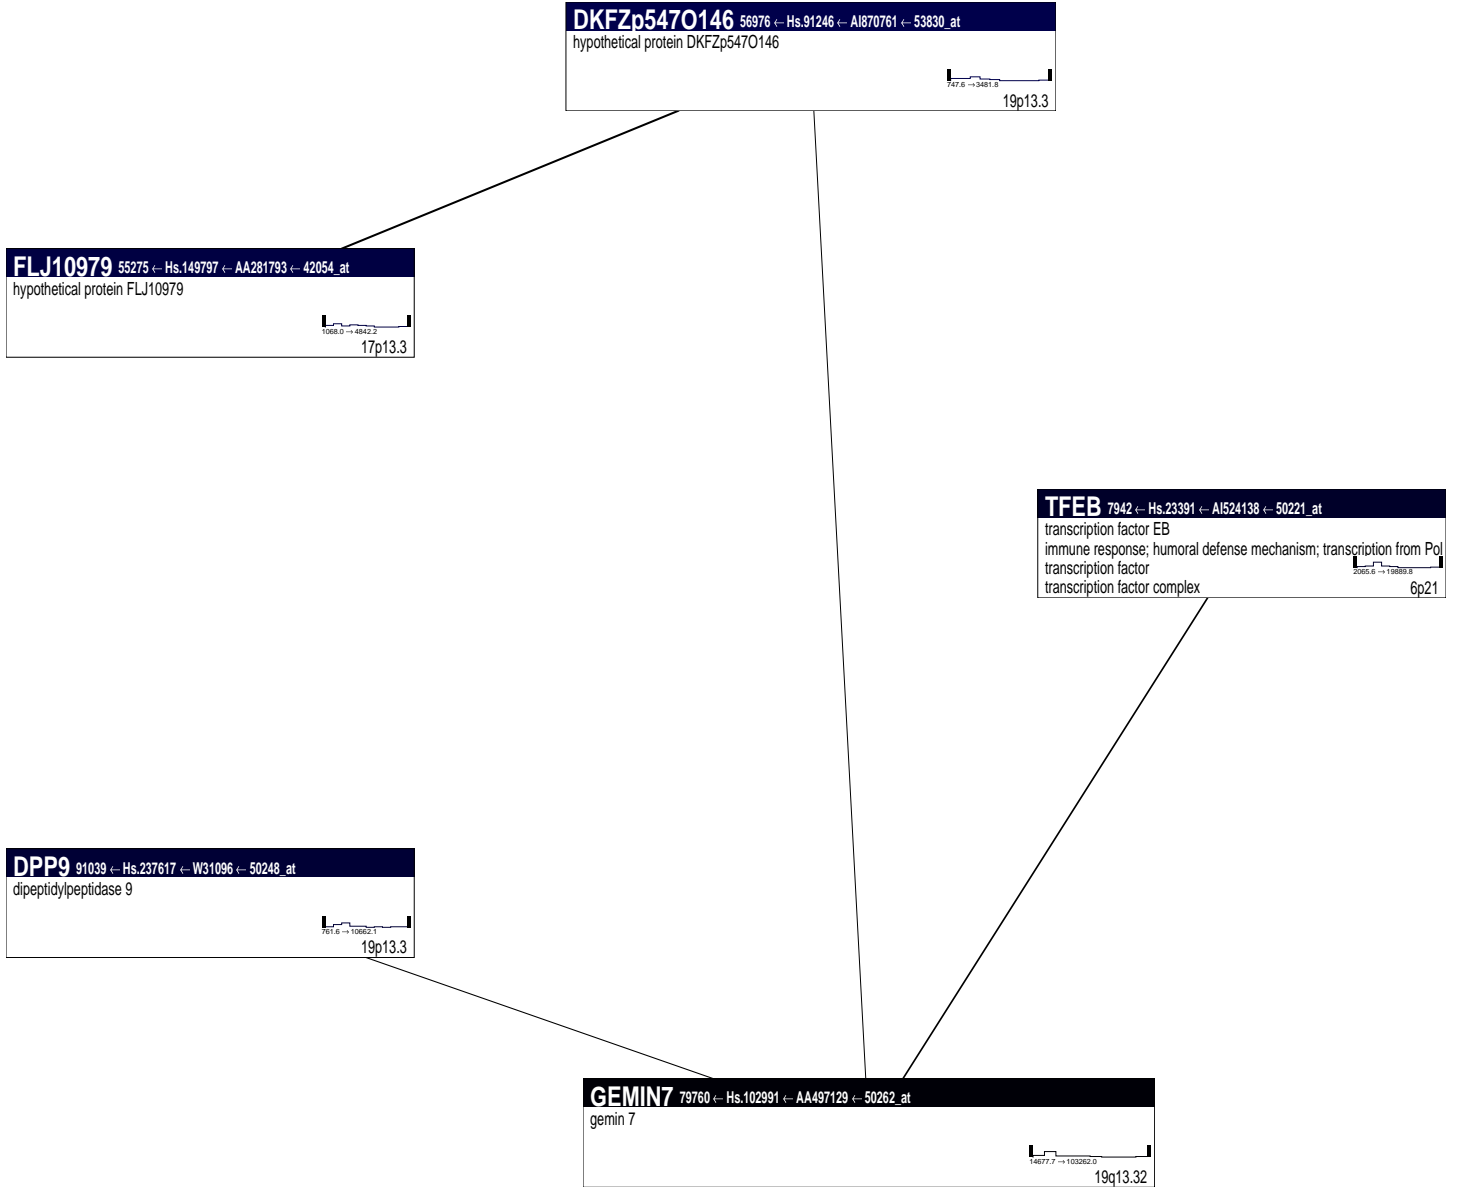

**HSPB2** 3316 ← S67070 ← 541\_g\_at

heat shock 27kD protein 2

stress response; heat shock response

protein binding; enzyme activator; heat shock protein

cytosol

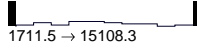

11q22-q23

**HSPB2** 3316 ← S67070 ← 540\_at

heat shock 27kD protein 2

stress response; heat shock response

protein binding; enzyme activator; heat shock protein

cytosol

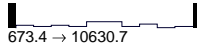

11q22-q23



**48287 at**

48287\_at

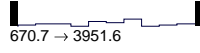

**1164 at**

1164\_at

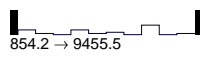

**FLJ21313** 65983 ← Hs.235445 ← AI982913 ← 44804\_s\_at

hypothetical protein FLJ21313

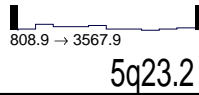

**TUBA3** 7846 ← X01703 ← 40567\_at

tubulin, alpha 3

neurogenesis; glia cell differentiation; cell shape and cell size control

cytoskeletal structural protein

microtubule

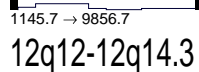

**45786 at**

45786\_at

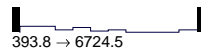

**S100A4** 6275 ← Hs.81256 ← W72186 ← 38087\_s\_at

S100 calcium binding protein A4 (calcium protein, calvasculin, metastas  
invasive growth  
calcium binding

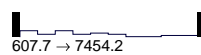

1q21

**PHKB** 5257 ← X84908 ← 37392\_at

phosphorylase kinase, beta

energy pathways; glycogen metabolism; glycogen catabolism

phosphorylase kinase; phosphorylase kinase regulator

3046.0 → 8902.4

16q12-q13

**ZNF238** 10472 ← AJ223321 ← 35824\_at

zinc finger protein 238

chromosome organization and biogenesis; repression of transcription fr

protein binding; transcription factor; specific RNA polyr

3245.1 → 10884.1

nuclear chromosome

1q44-qter

**FLJ20811** 54470 ← Hs.83530 ← AA015605 ← 38440\_s\_at

hypothetical protein FLJ20811

158.2 → 2165.4  
Xq21.33-q22.3

**MAGED2** 10916 ← Z98046 ← 34860\_g\_at

melanoma antigen, family D, 2

3675.3 → 18475.5  
Xp11.4-p11.1

**43827 s at**

43827\_s\_at

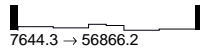

**LDHB** 3945 ← X13794 ← 33819\_at

lactate dehydrogenase B

L-lactate dehydrogenase

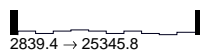

12p12.2-p12.1

**AK3** 205 ← Hs.274691 ← AW015546 ← 48822\_s\_at

adenylate kinase 3

nucleobase, nucleoside, nucleotide and nucleic acid metabolism

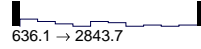

1

**PEA15** 8682 ← Hs.194673 ← X86809 ← 32260\_at

phosphoprotein enriched in astrocytes 15

small molecule transport

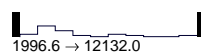

1q21.1

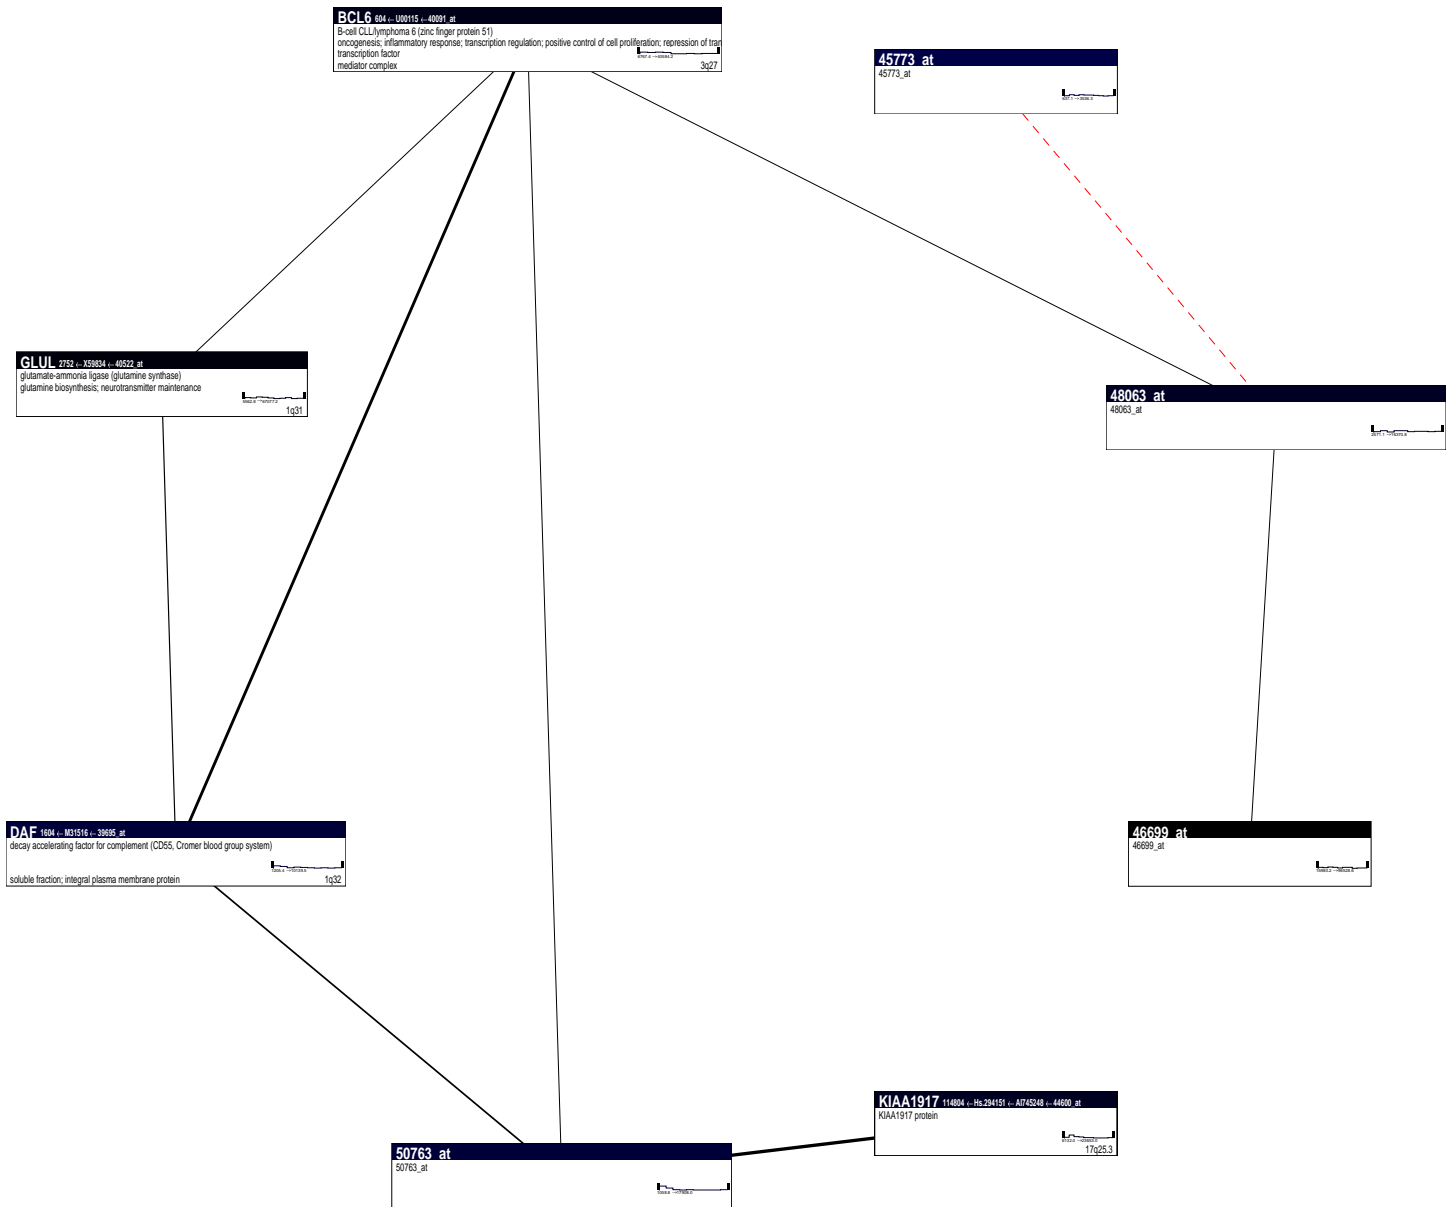



**SH3GLB1** 51100 ← AB007960 ← 39691\_at  
SH3-domain GRB2-like endophilin B1  
4701.2 → 16553.8  
1p22

**USP24** 23358 ← AB028980 ← 35847\_at  
ubiquitin specific protease 24  
2474.5 → 11267.6  
1p32.2

**OPTN** 10133 ← AF070533 ← 41744\_at  
optineurin  
cell death; pathogenesis; signal transduction  
3321.1 → 19431.2  
10p12.33

**RAF1** 5894 ← X03484 ← 1917\_at

v-raf-1 murine leukemia viral oncogene homolog 1  
apoptosis; oncogenesis; cell proliferation; signal transduction; protein p  
protein kinase  
mitochondrial outer membrane

1302.3 → 9729.3

3p25

**FTHFD** 10840 ← AF052732 ← 38316\_at

formyltetrahydrofolate dehydrogenase  
10-formyltetrahydrofolate catabolism  
enzyme; electron transporter

702.0 → 4801.8

3q21.3

**55894 at**

55894\_at

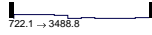

**54980 at**

54980\_at

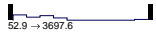

**LSP1** 4046 ← M33552 ← 36493\_at

lymphocyte-specific protein 1

cell motility; cellular defense response; cell shape and cell size control

actin binding

actin cytoskeleton

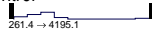

11p15.5

**RERE** 473 ← AB007927 ← 32253\_at

arginine-glutamic acid dipeptide (RE) repeats

NLS-bearing substrate-nucleus import

molecular\_function unknown; poly-glutamine tract bind

nucleus

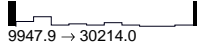

1p36.1-p36.2

**PTOV1** 53635 ← Hs.19555 ← W25984 ← 32130\_at

prostate tumor over expressed gene 1

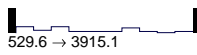

19q13.33

**55989 at**  
55989\_at  
2093.7 → 7075.2

**UBE2D1** 7321 ← AF020761 ← 37826\_at  
ubiquitin-conjugating enzyme E2D 1 (UBC4/5 homolog, yeast)  
ubiquitin-dependent protein degradation  
ubiquitin--protein ligase; ubiquitin conjugating enzyme  
4894.2 → 20814.0  
10q11.2-q21

**ZNF161** 7716 ← D28118 ← 32628\_at  
zinc finger protein 161  
cellular defense response; transcription regulation from Pol II promoter  
specific RNA polymerase II transcription factor  
1477.4 → 7979.6  
17q23.3

**ZNF161** 7716 ← D28118 ← 350\_at  
zinc finger protein 161  
cellular defense response; transcription regulation from Pol II promoter  
specific RNA polymerase II transcription factor  
715.3 → 3811.0  
17q23.3

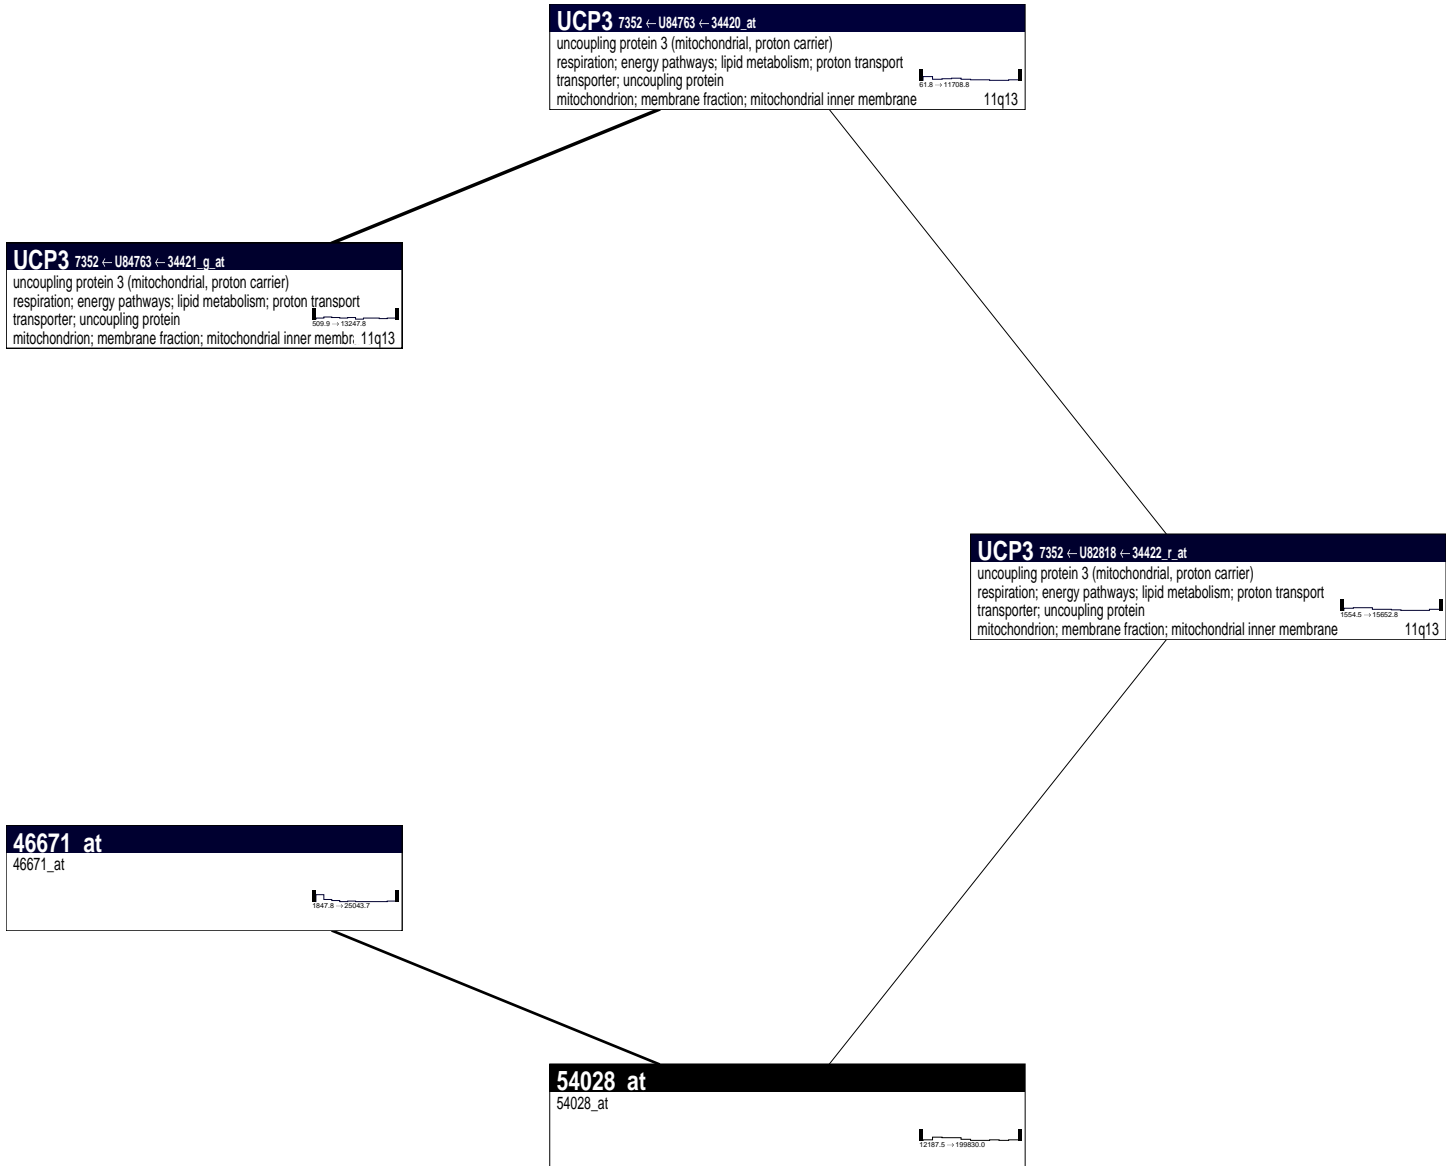

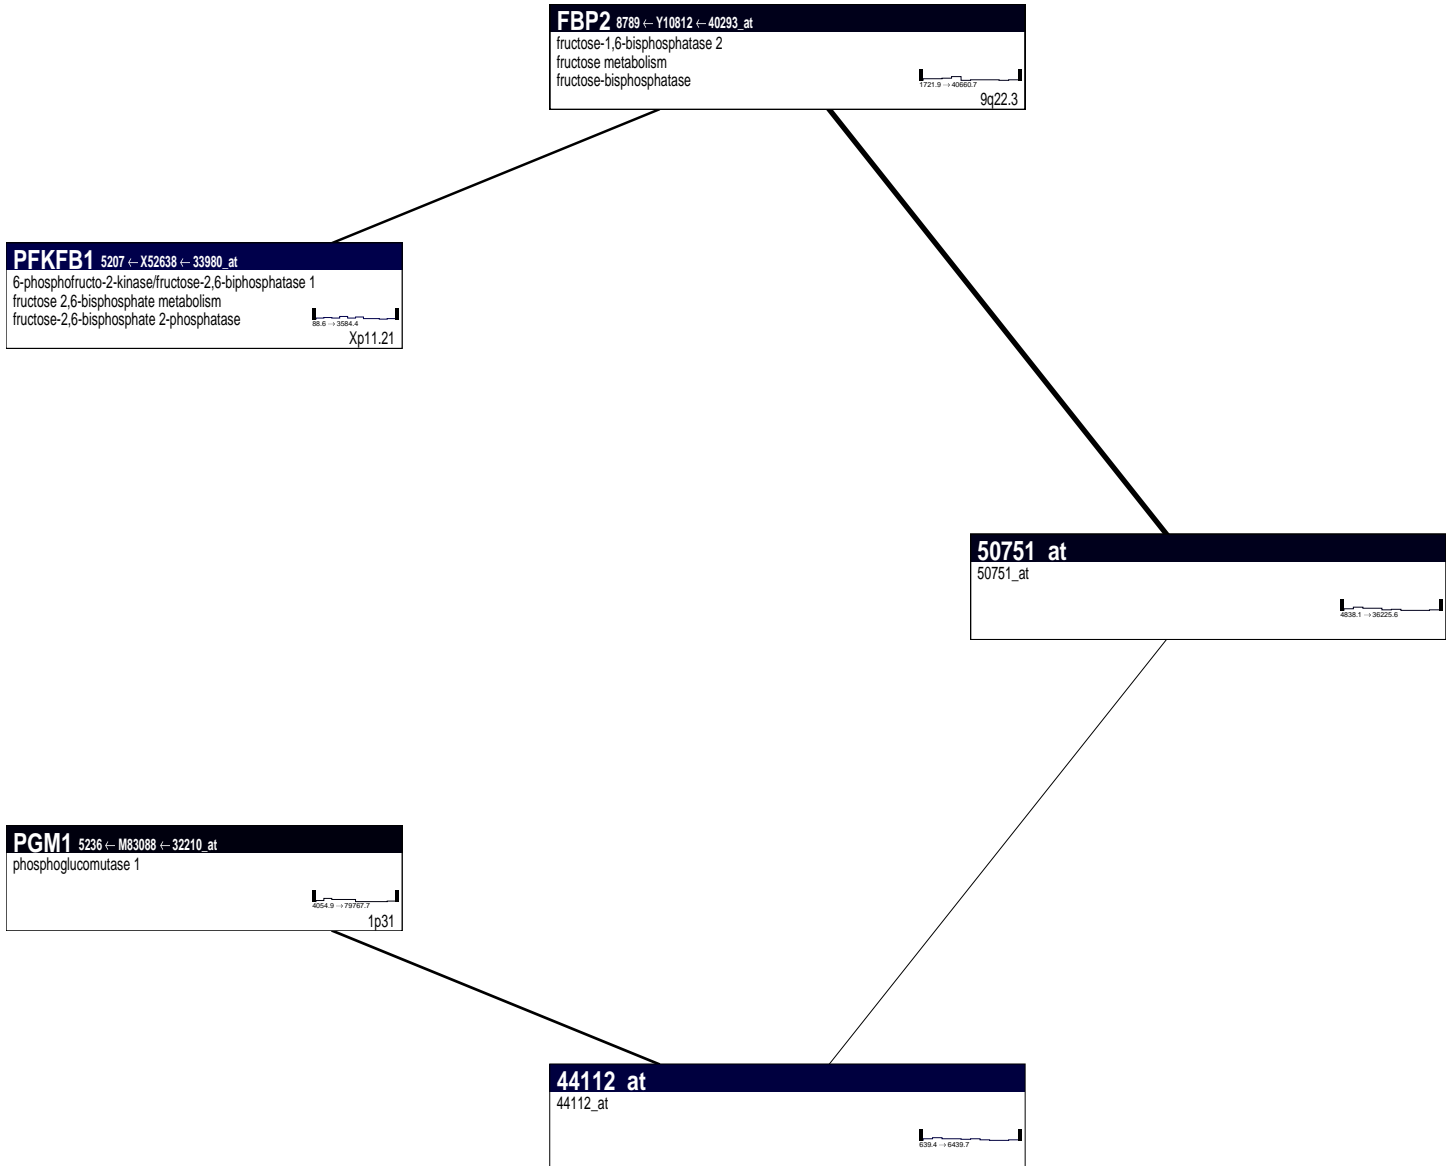

**SIRT1** 23411 ← Hs.31176 ← AI381553 ← 46399\_at  
sirtuin silent mating type information regulation 2 homolog 1 (S. cerevisiae)  
chromatin silencing; protein ADP-ribosylation  
NAD(+) ADP-ribosyltransferase  
248.6 → 1538.8  
10q22.2

**UBE4A** 9354 ← D50916 ← 36579\_at  
ubiquitination factor E4A (UFD2 homolog, yeast)  
ubiquitin-dependent protein degradation  
ubiquitin conjugating enzyme  
ubiquitin ligase complex  
1202.8 → 7298.6  
11q23.3

**LKAP** 9665 ← AB007890 ← 31936\_s\_at  
limkain b1  
2222.3 → 7938.5  
16p13.2
