# Supplementary material
Source: PubMed Central journal article supplement (PMC153613)

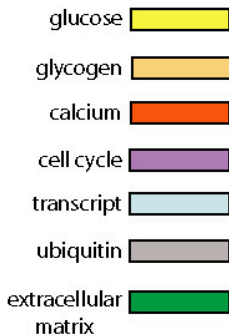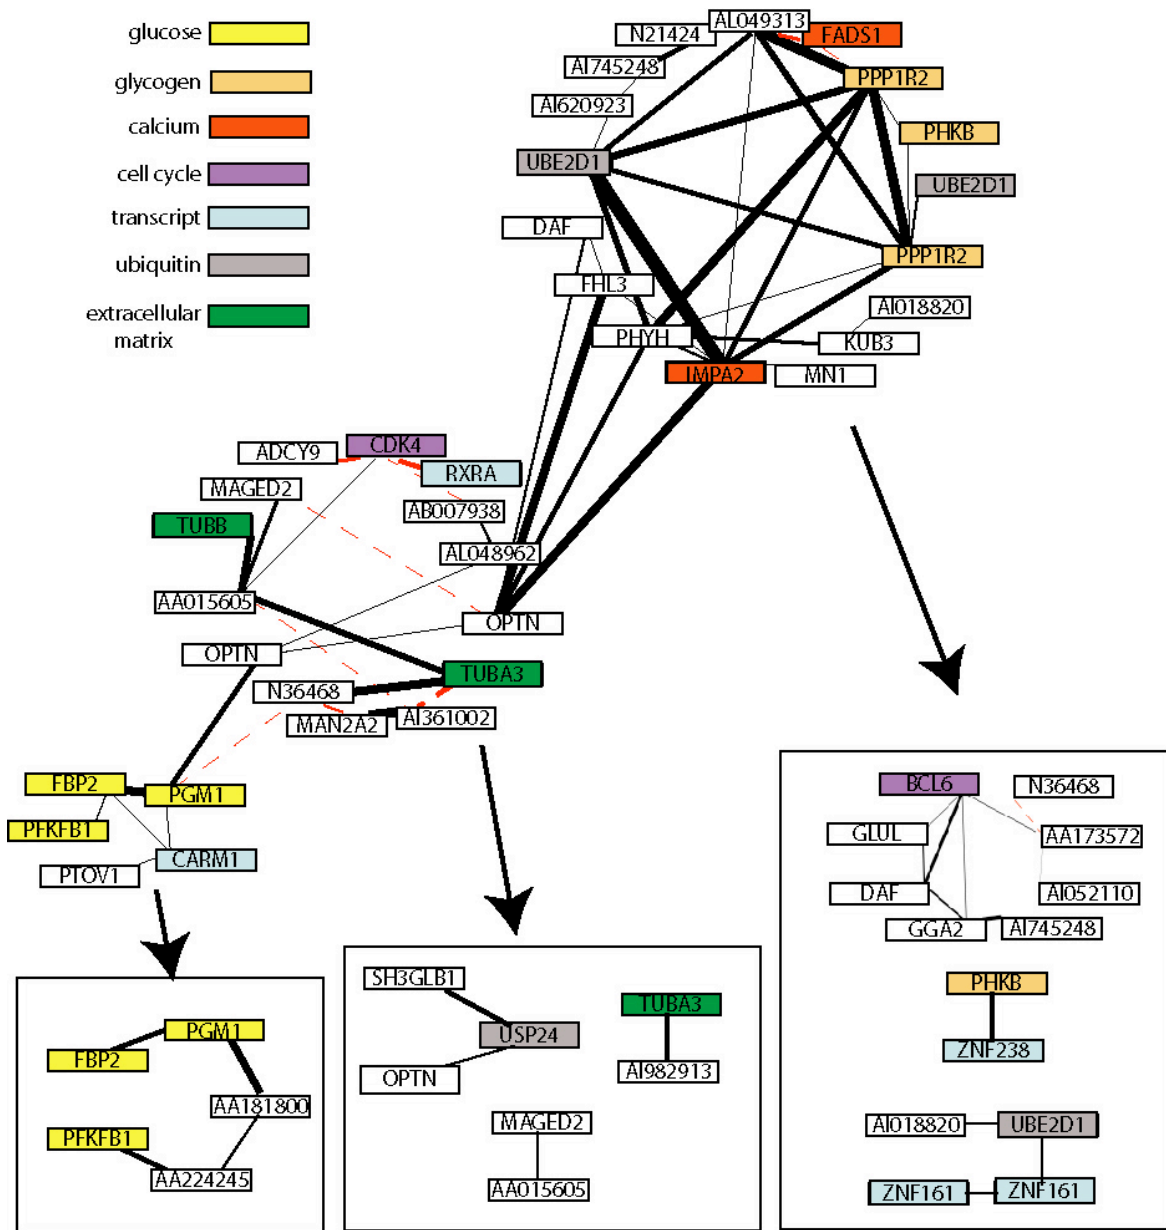

Supplement: pnas_0330960100_9.pdf [file pnas_0330960100_9.pdf]
